# Supplementary material for: Blocking LAIR1 signaling in immune cells inhibits tumor development
Source: PubMed Central journal article supplement (PMC9534319; doi:10.3389/fimmu.2022.996026), 2022-09-21

# Supplementary Fig 1

## Kidney Clear Cell Carcinoma (n = 985) from GDC TCGA

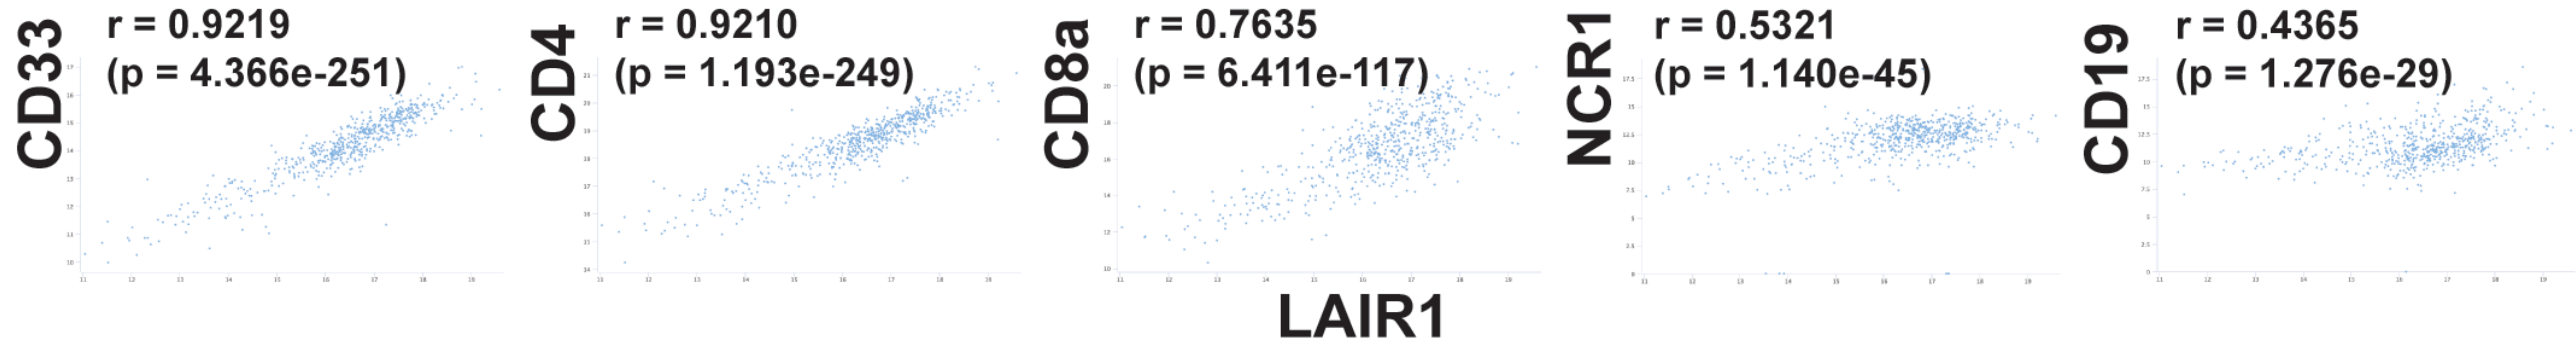

# Supplementary Fig 2

## A

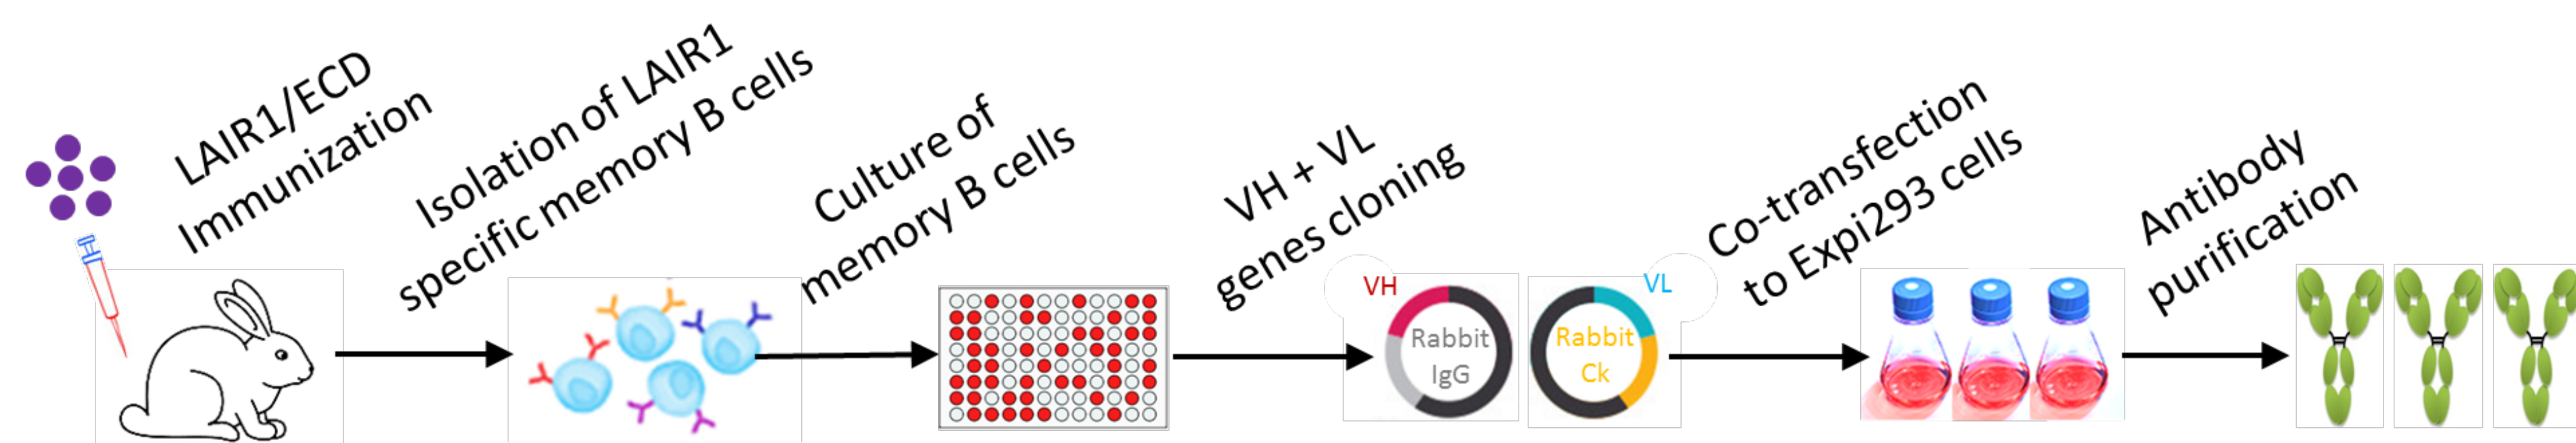

## B

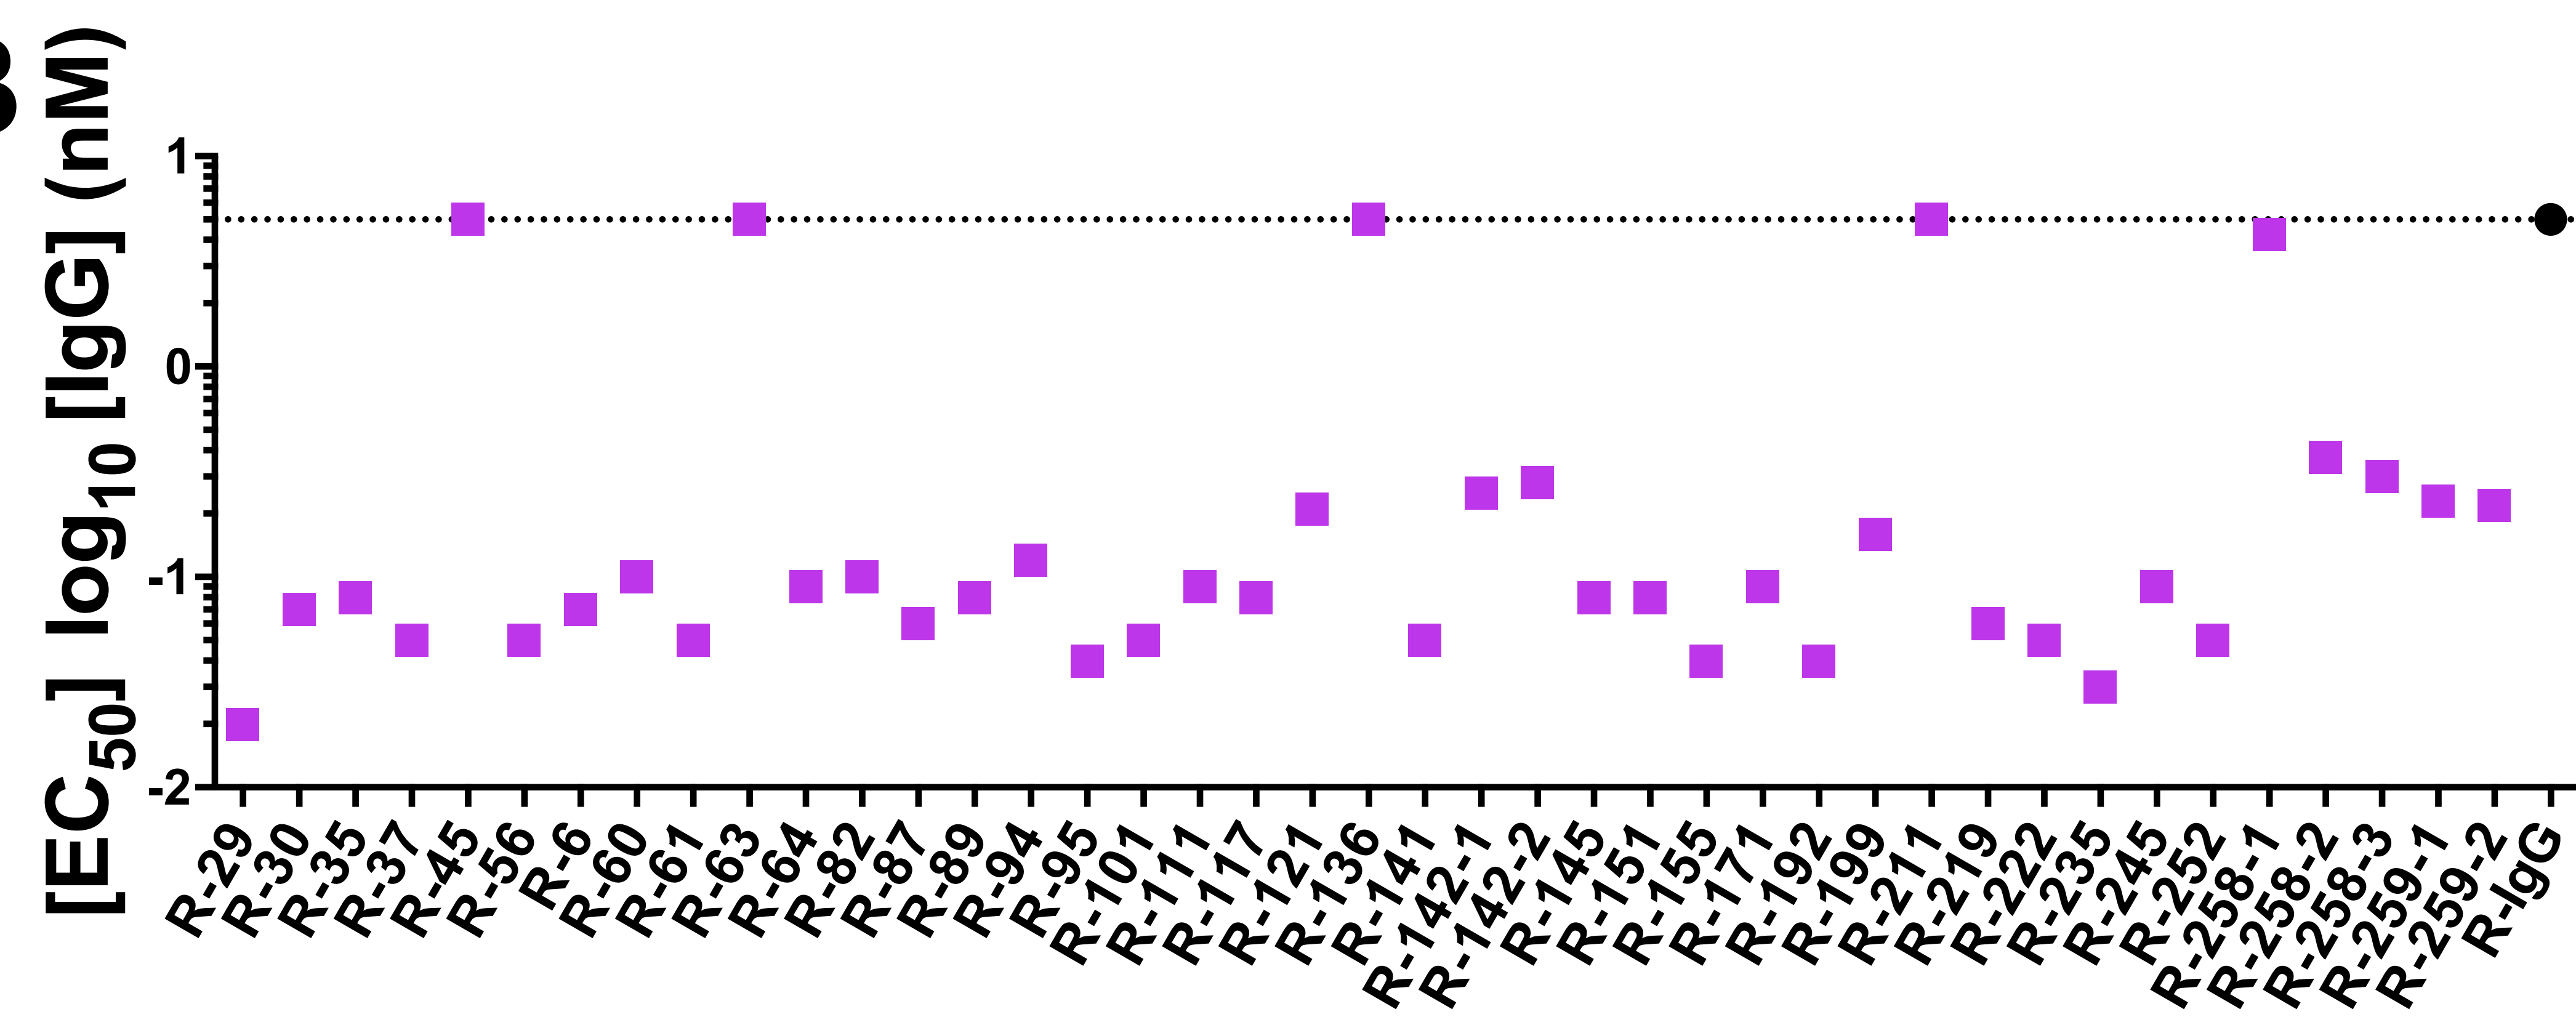

## C

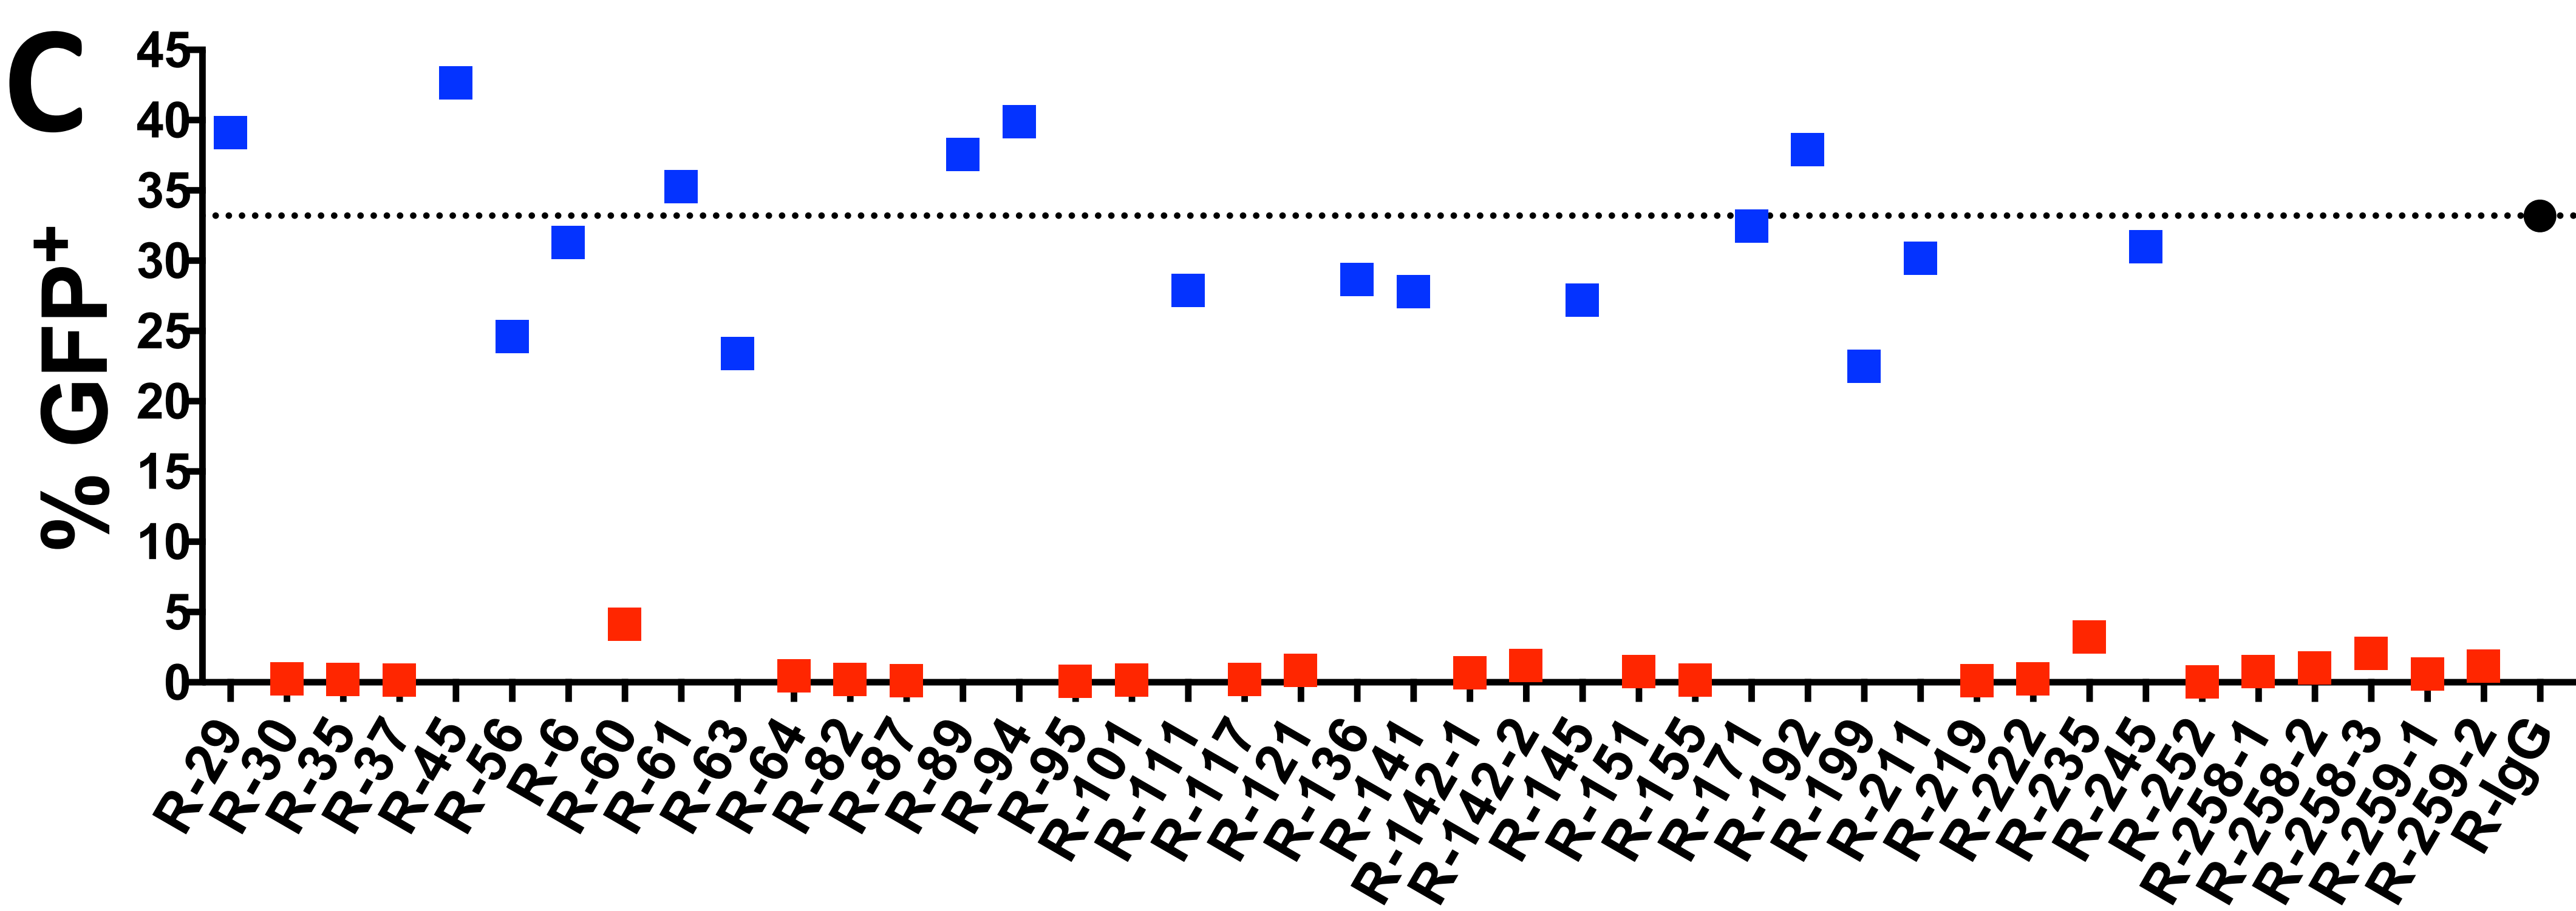

## D

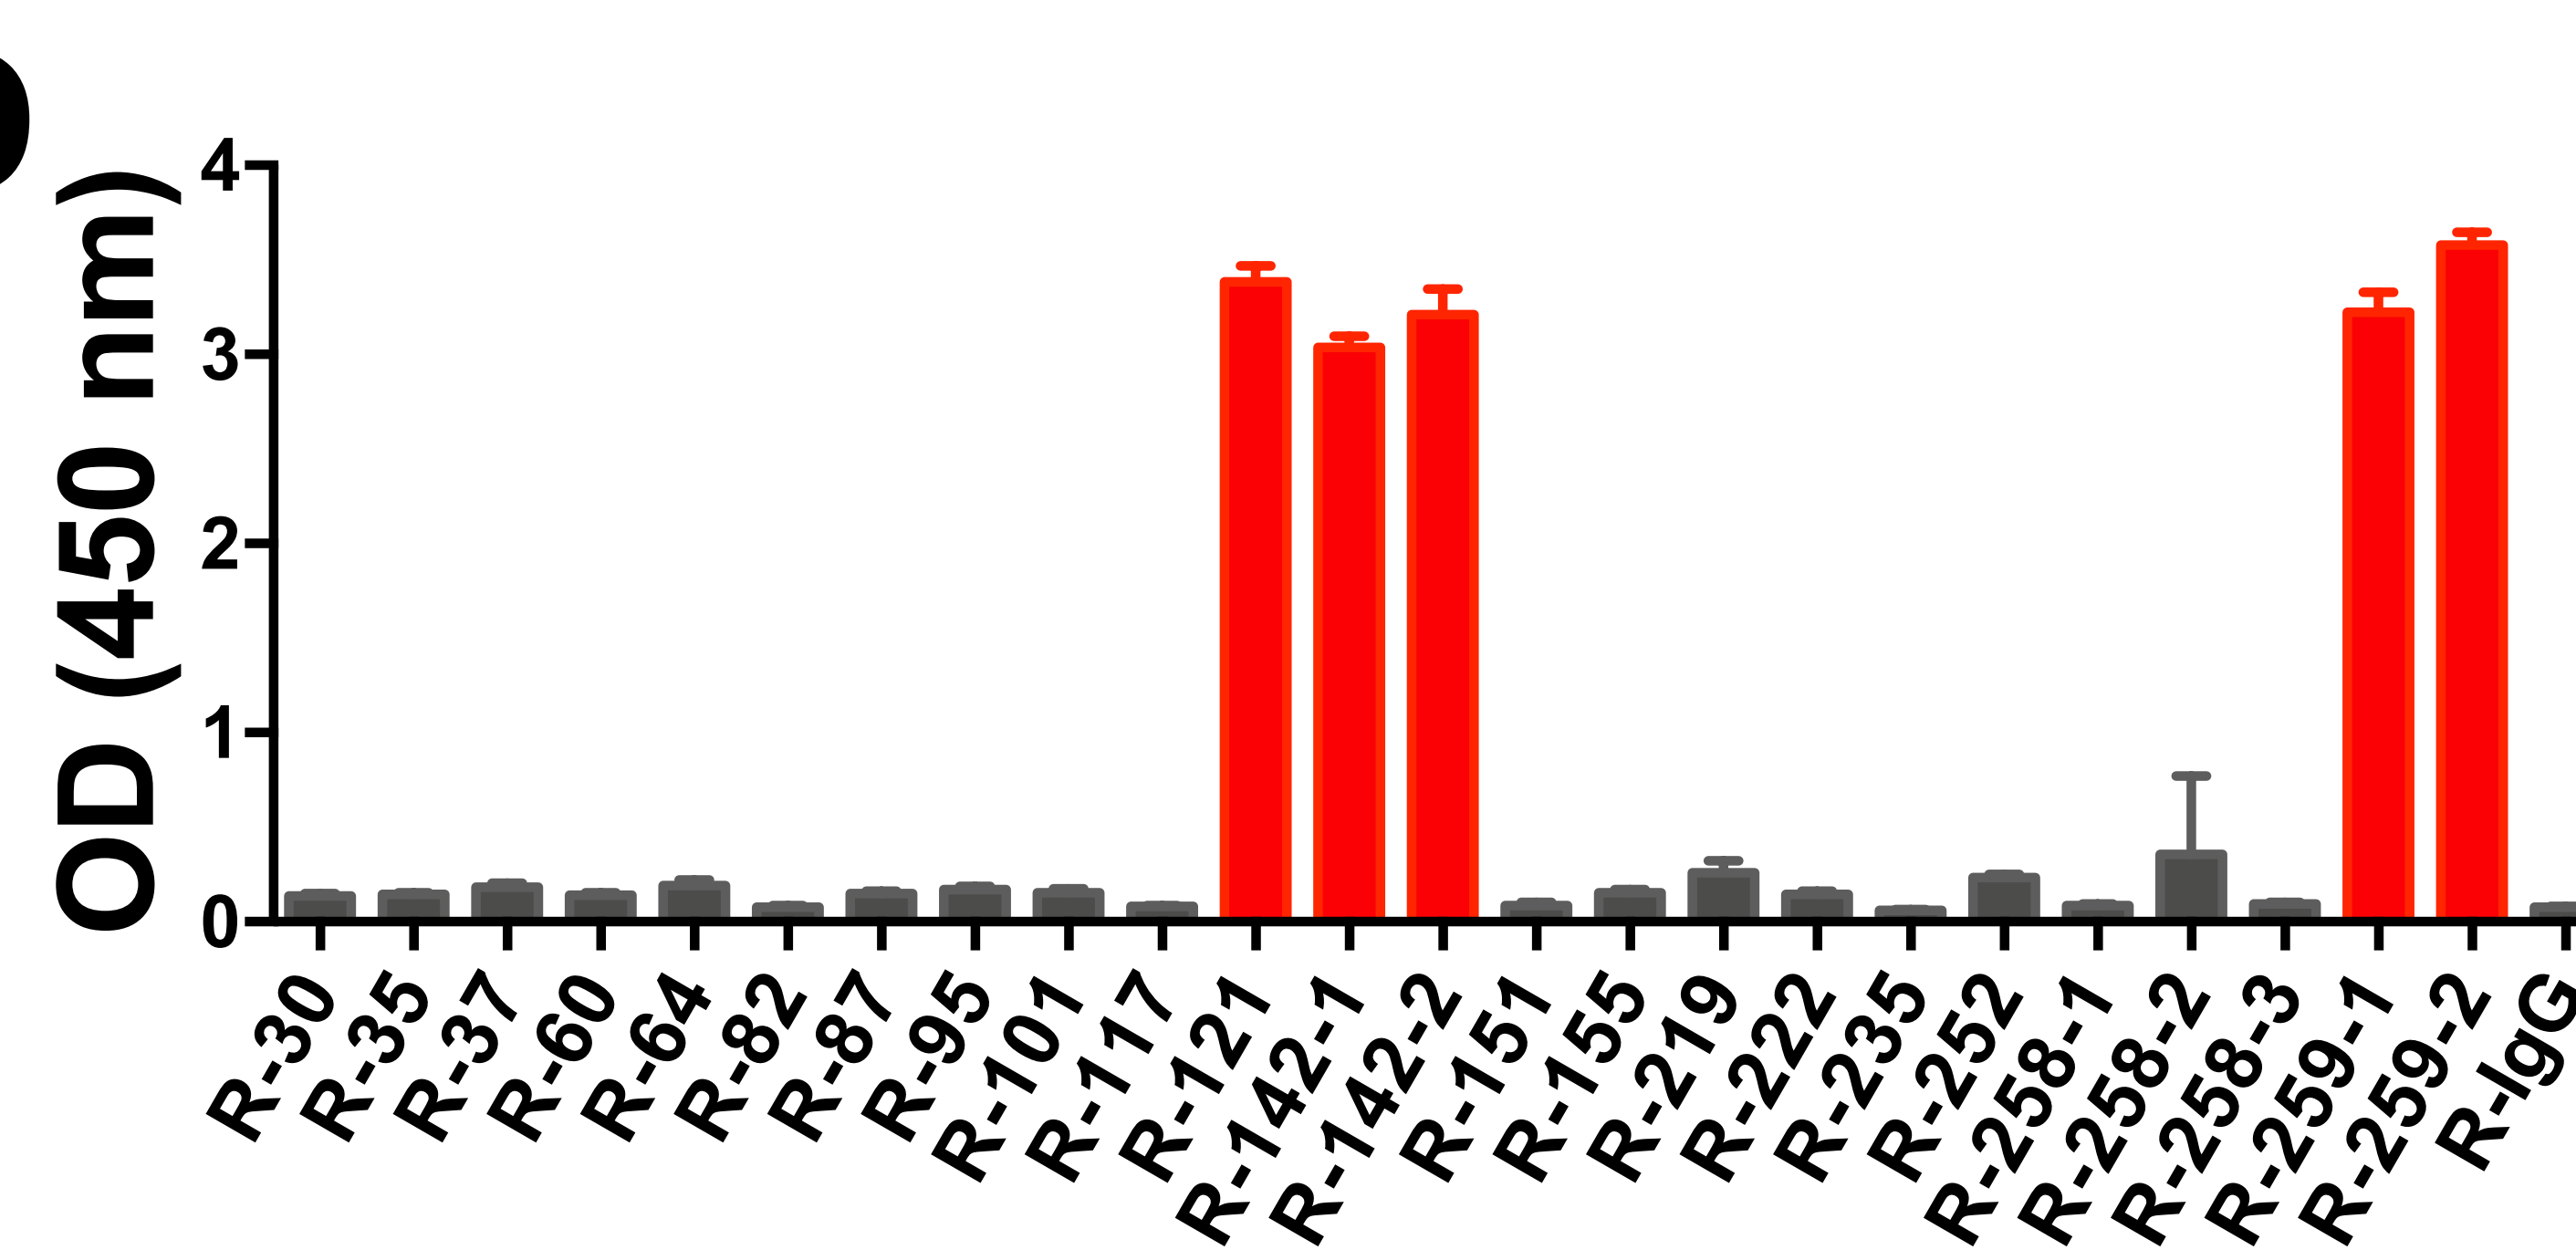

## E

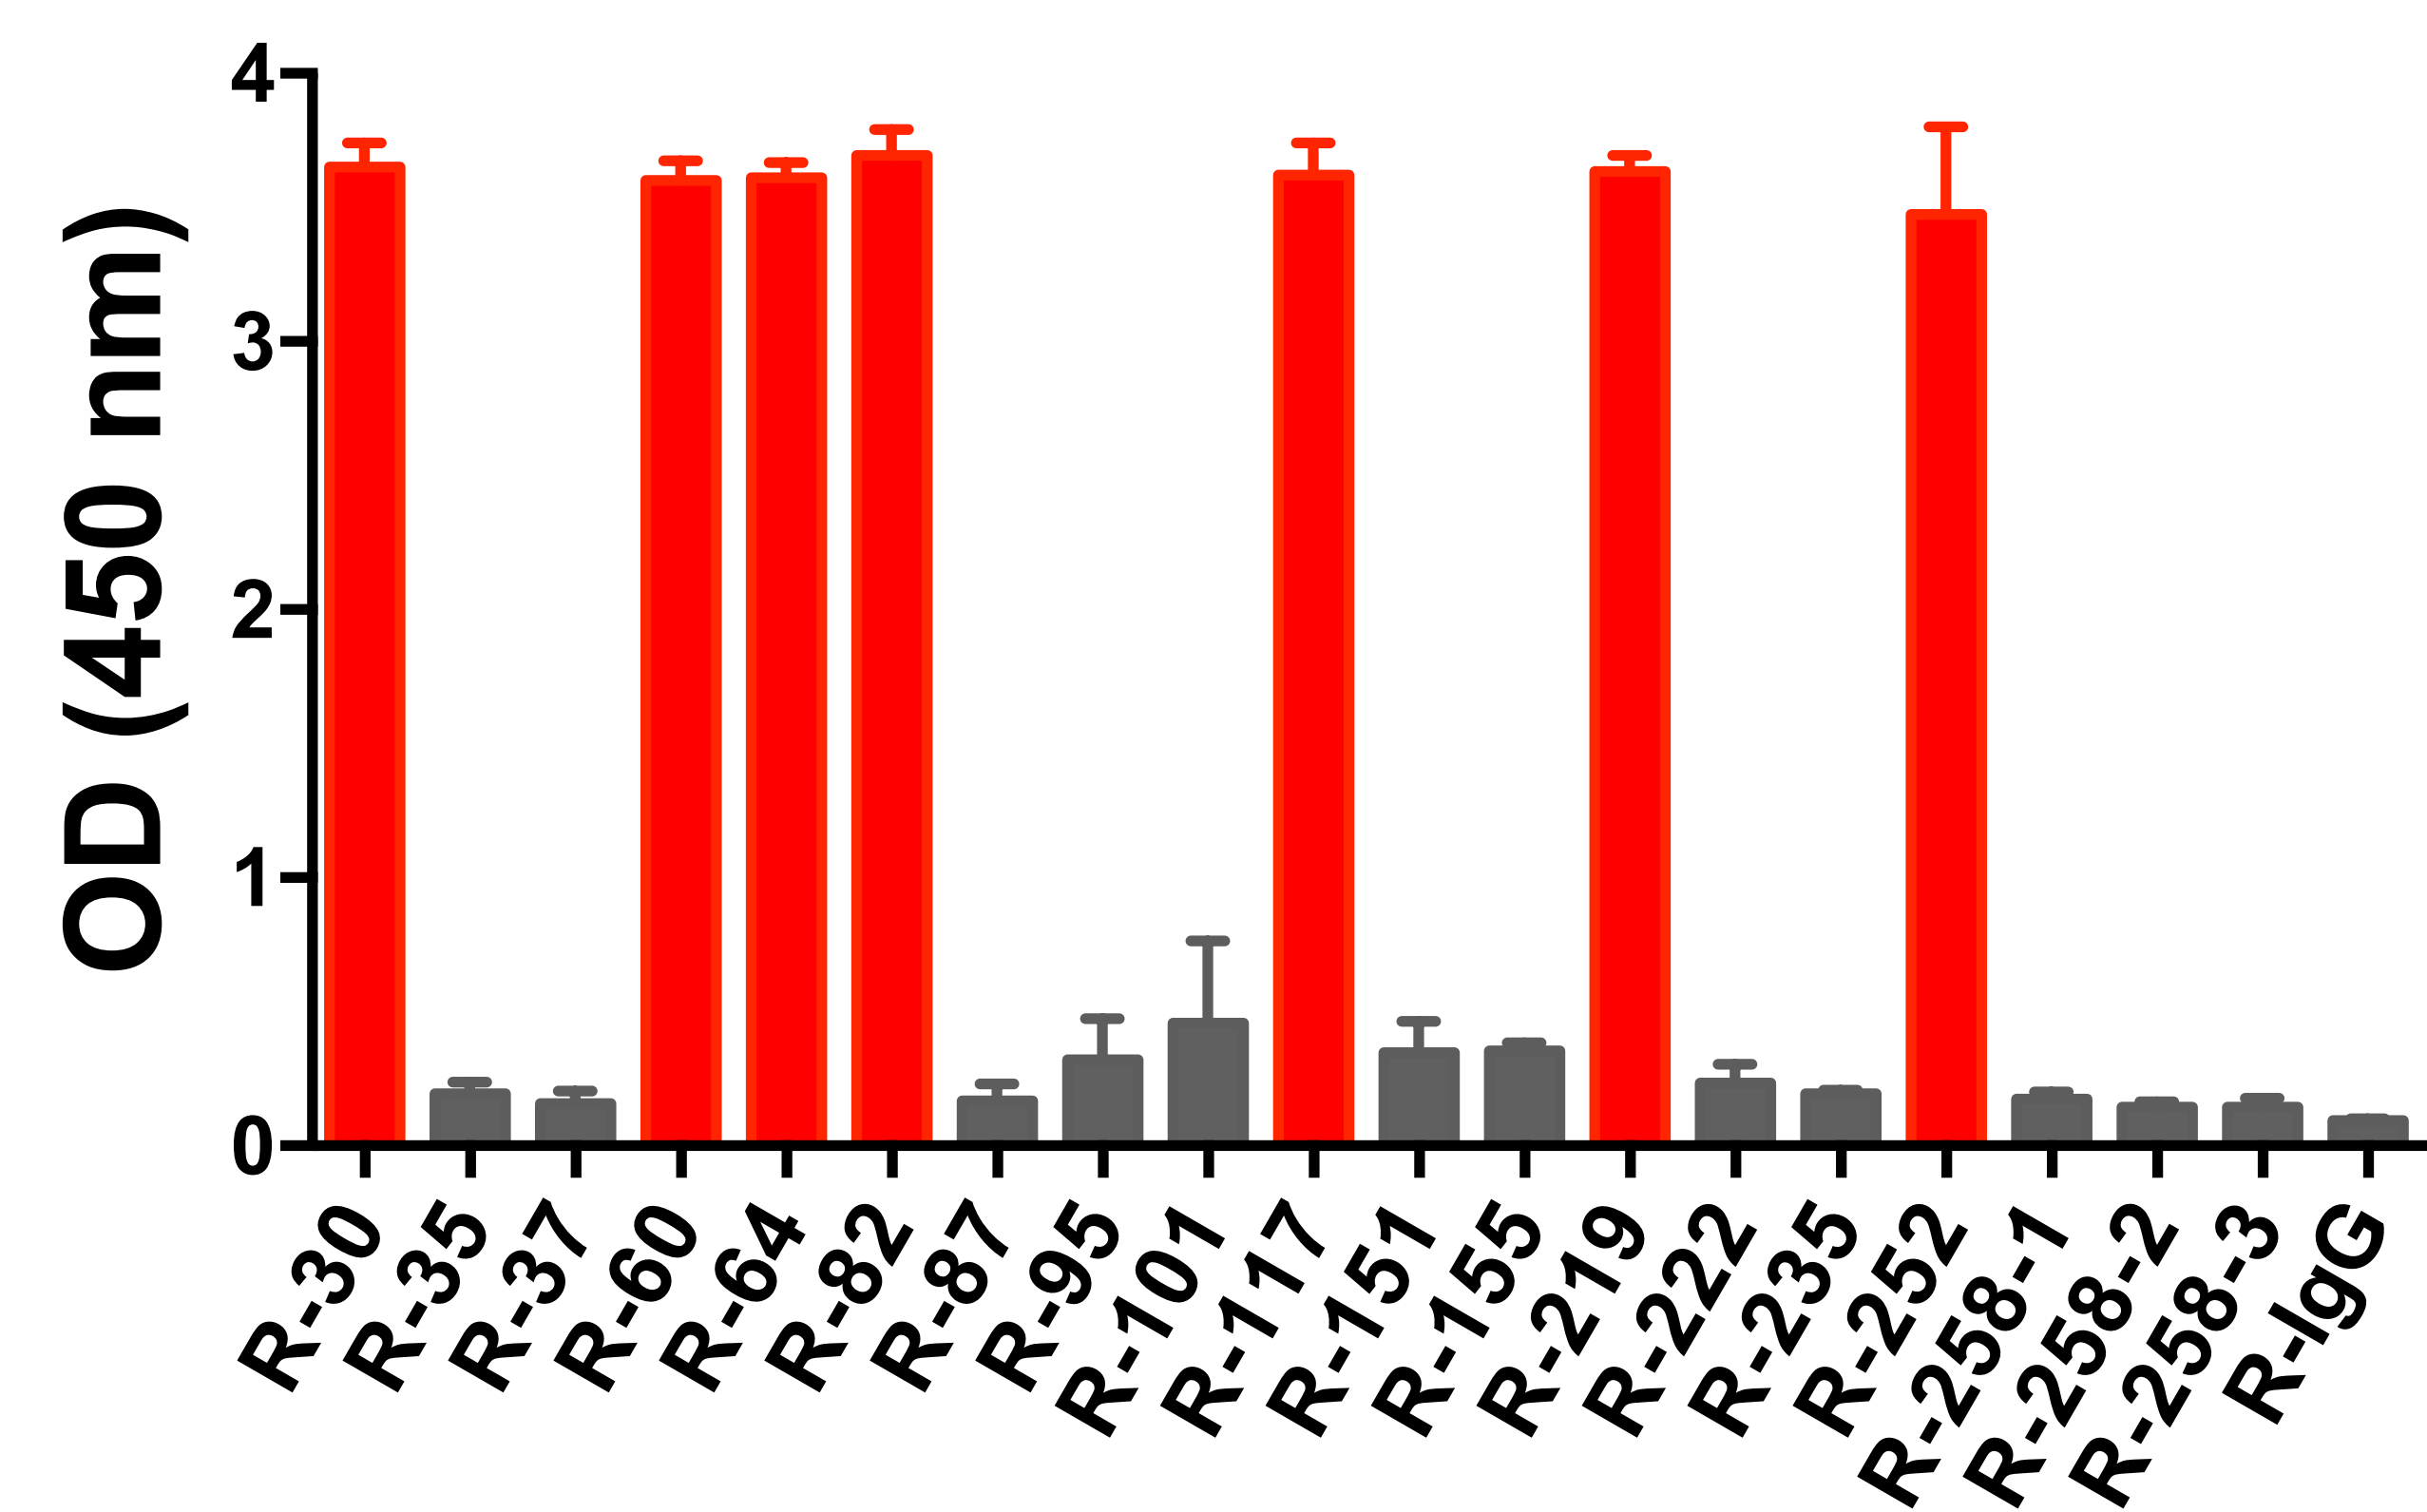

## F

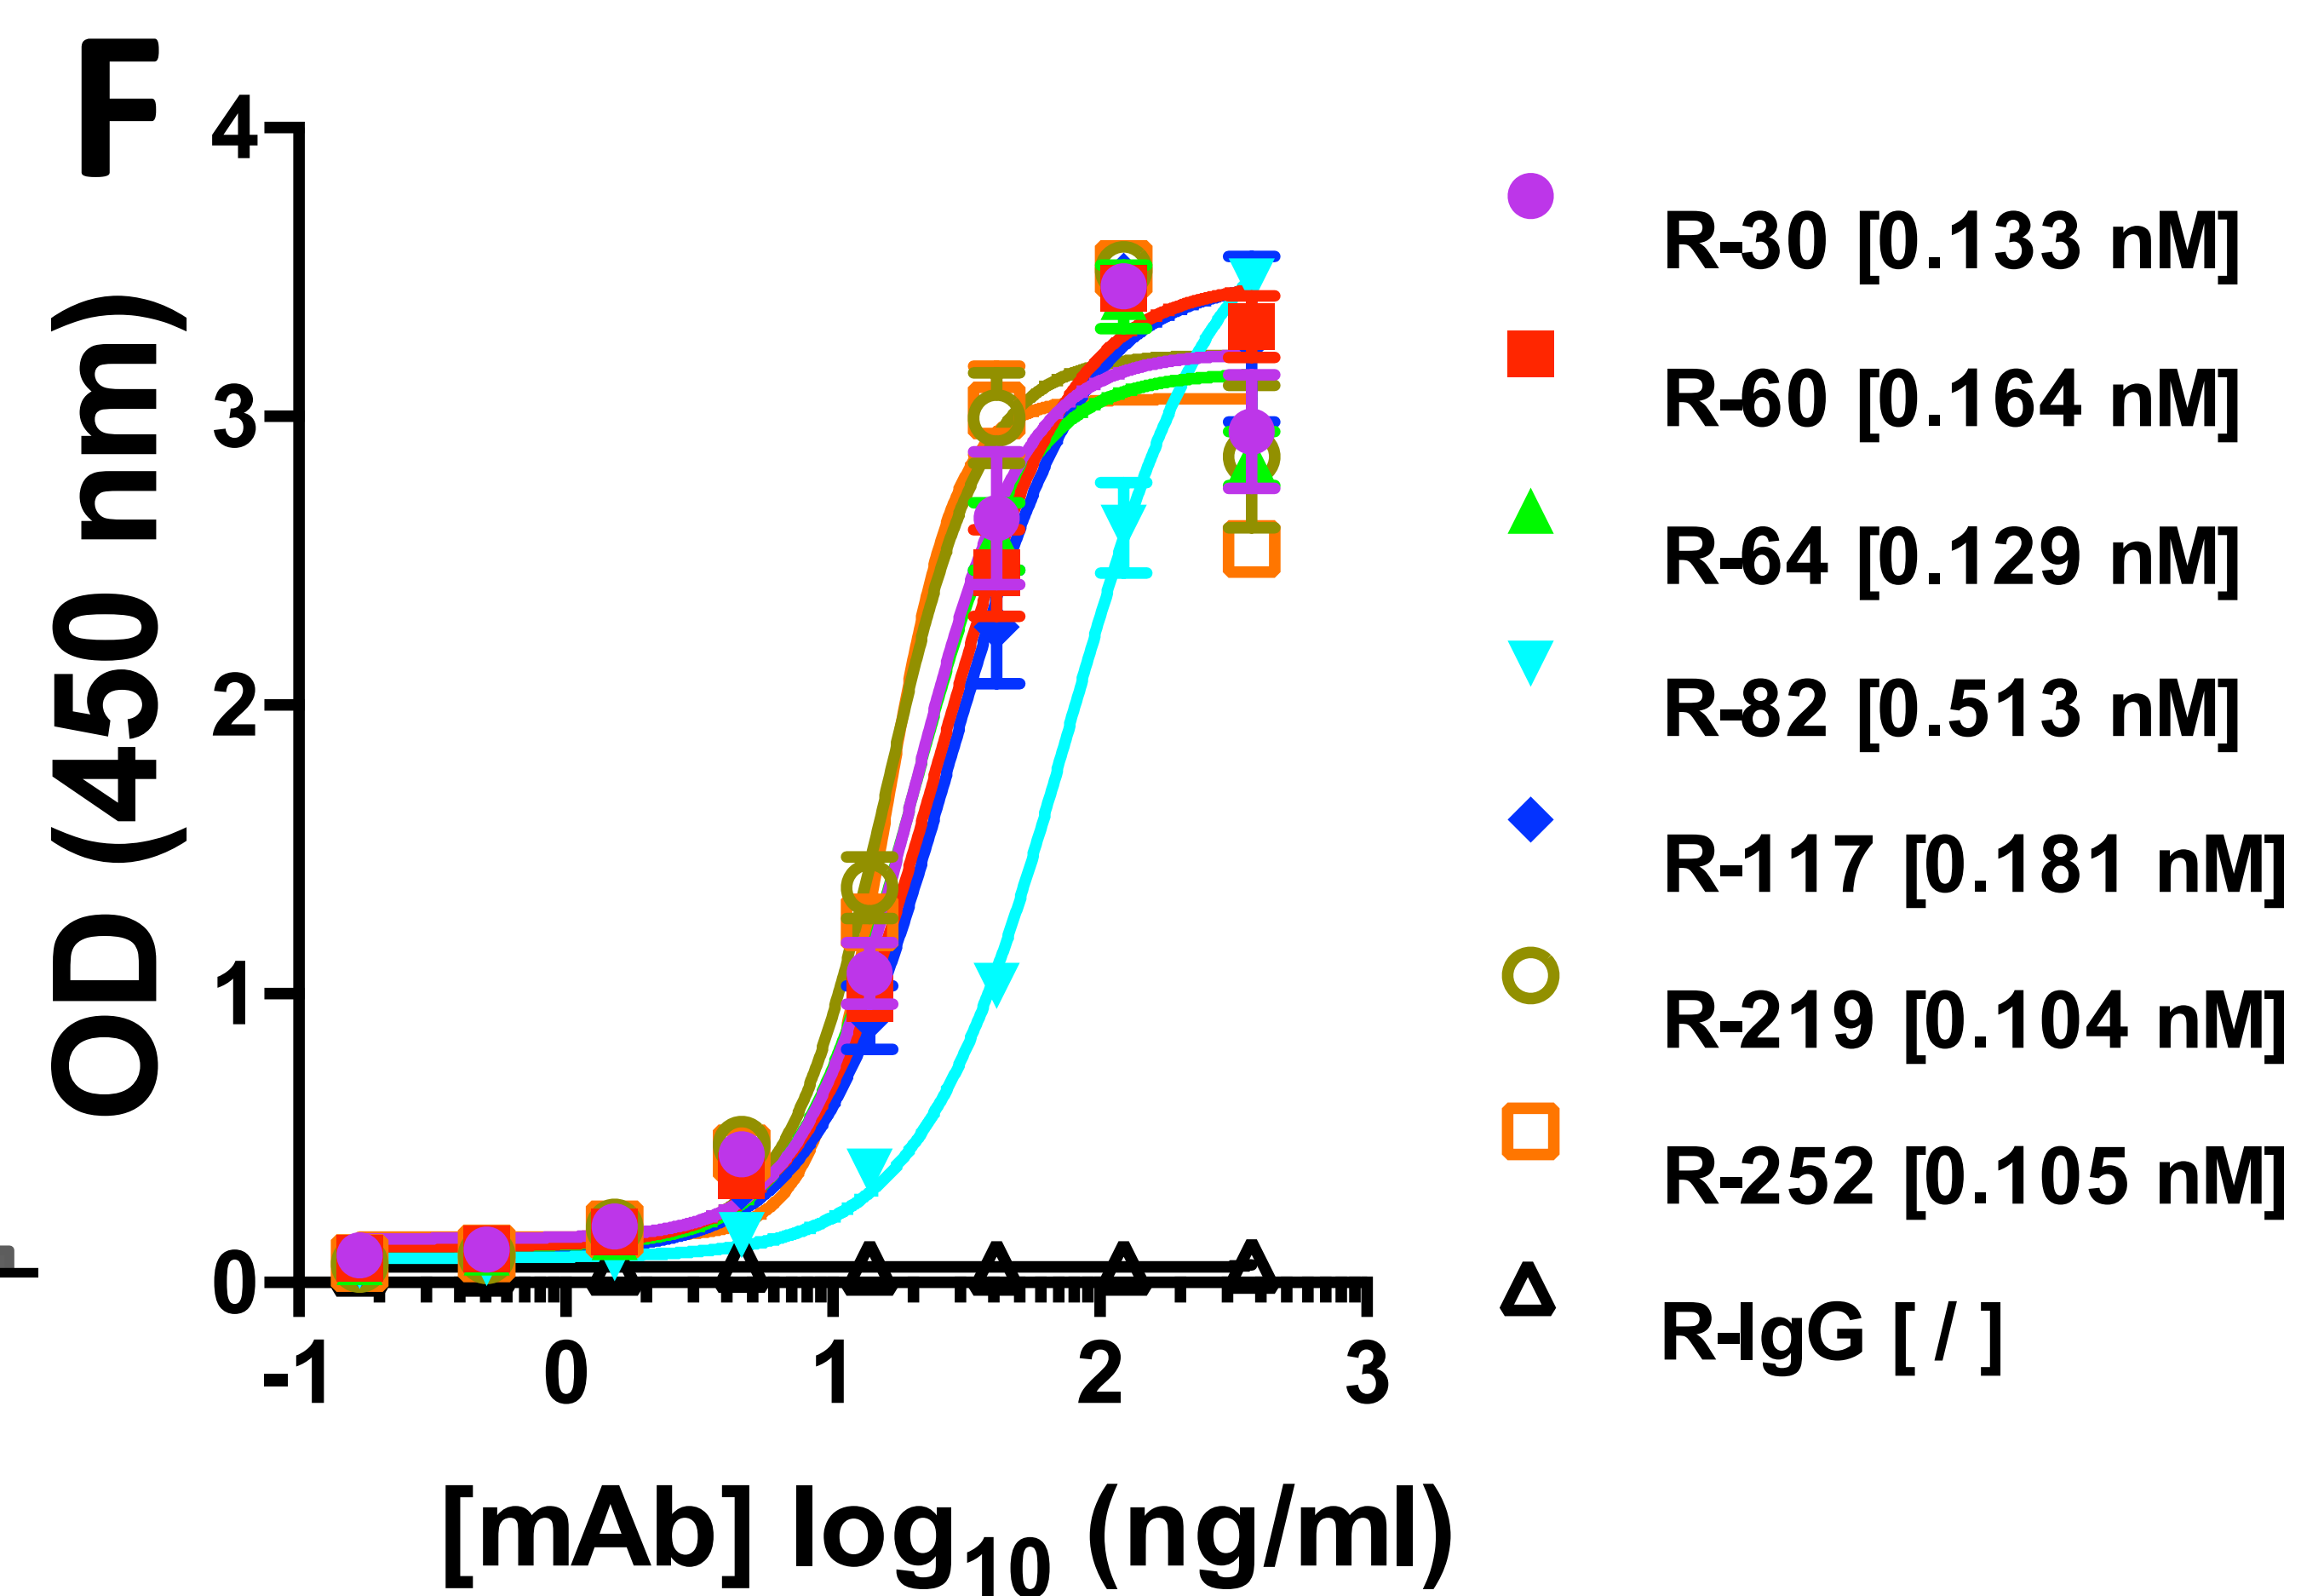

## G

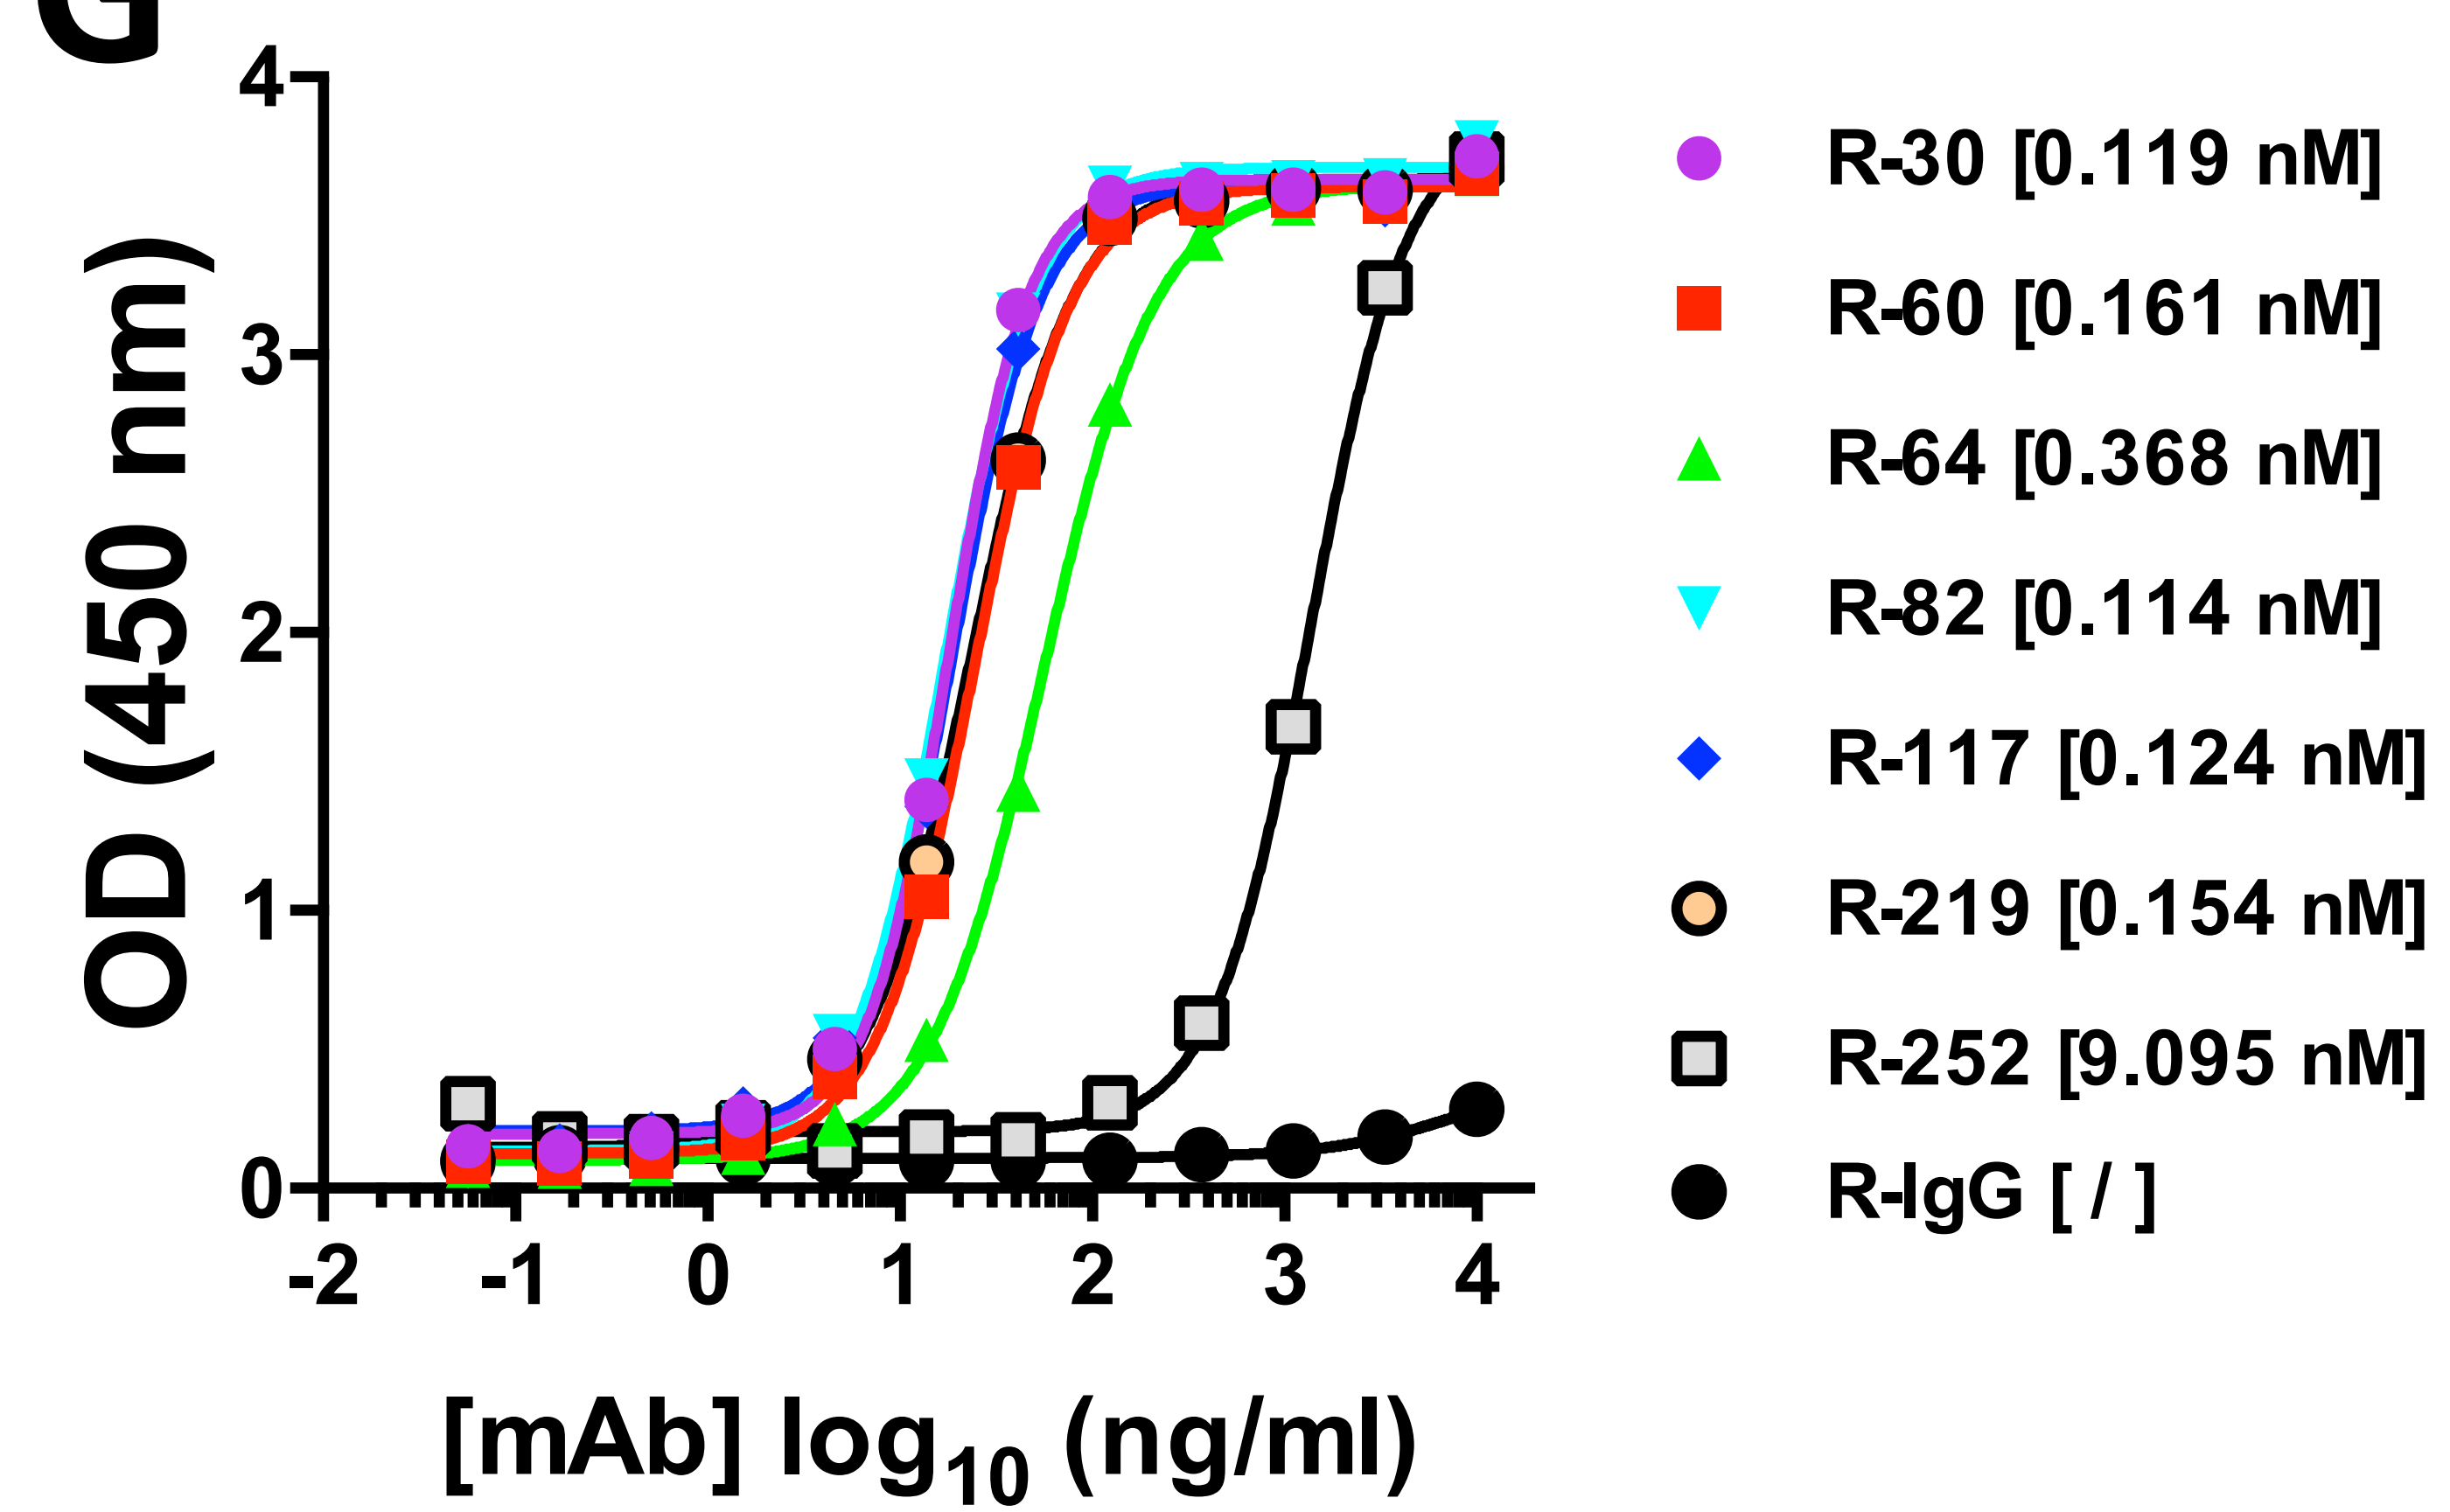

# Supplementary Fig 3

**A**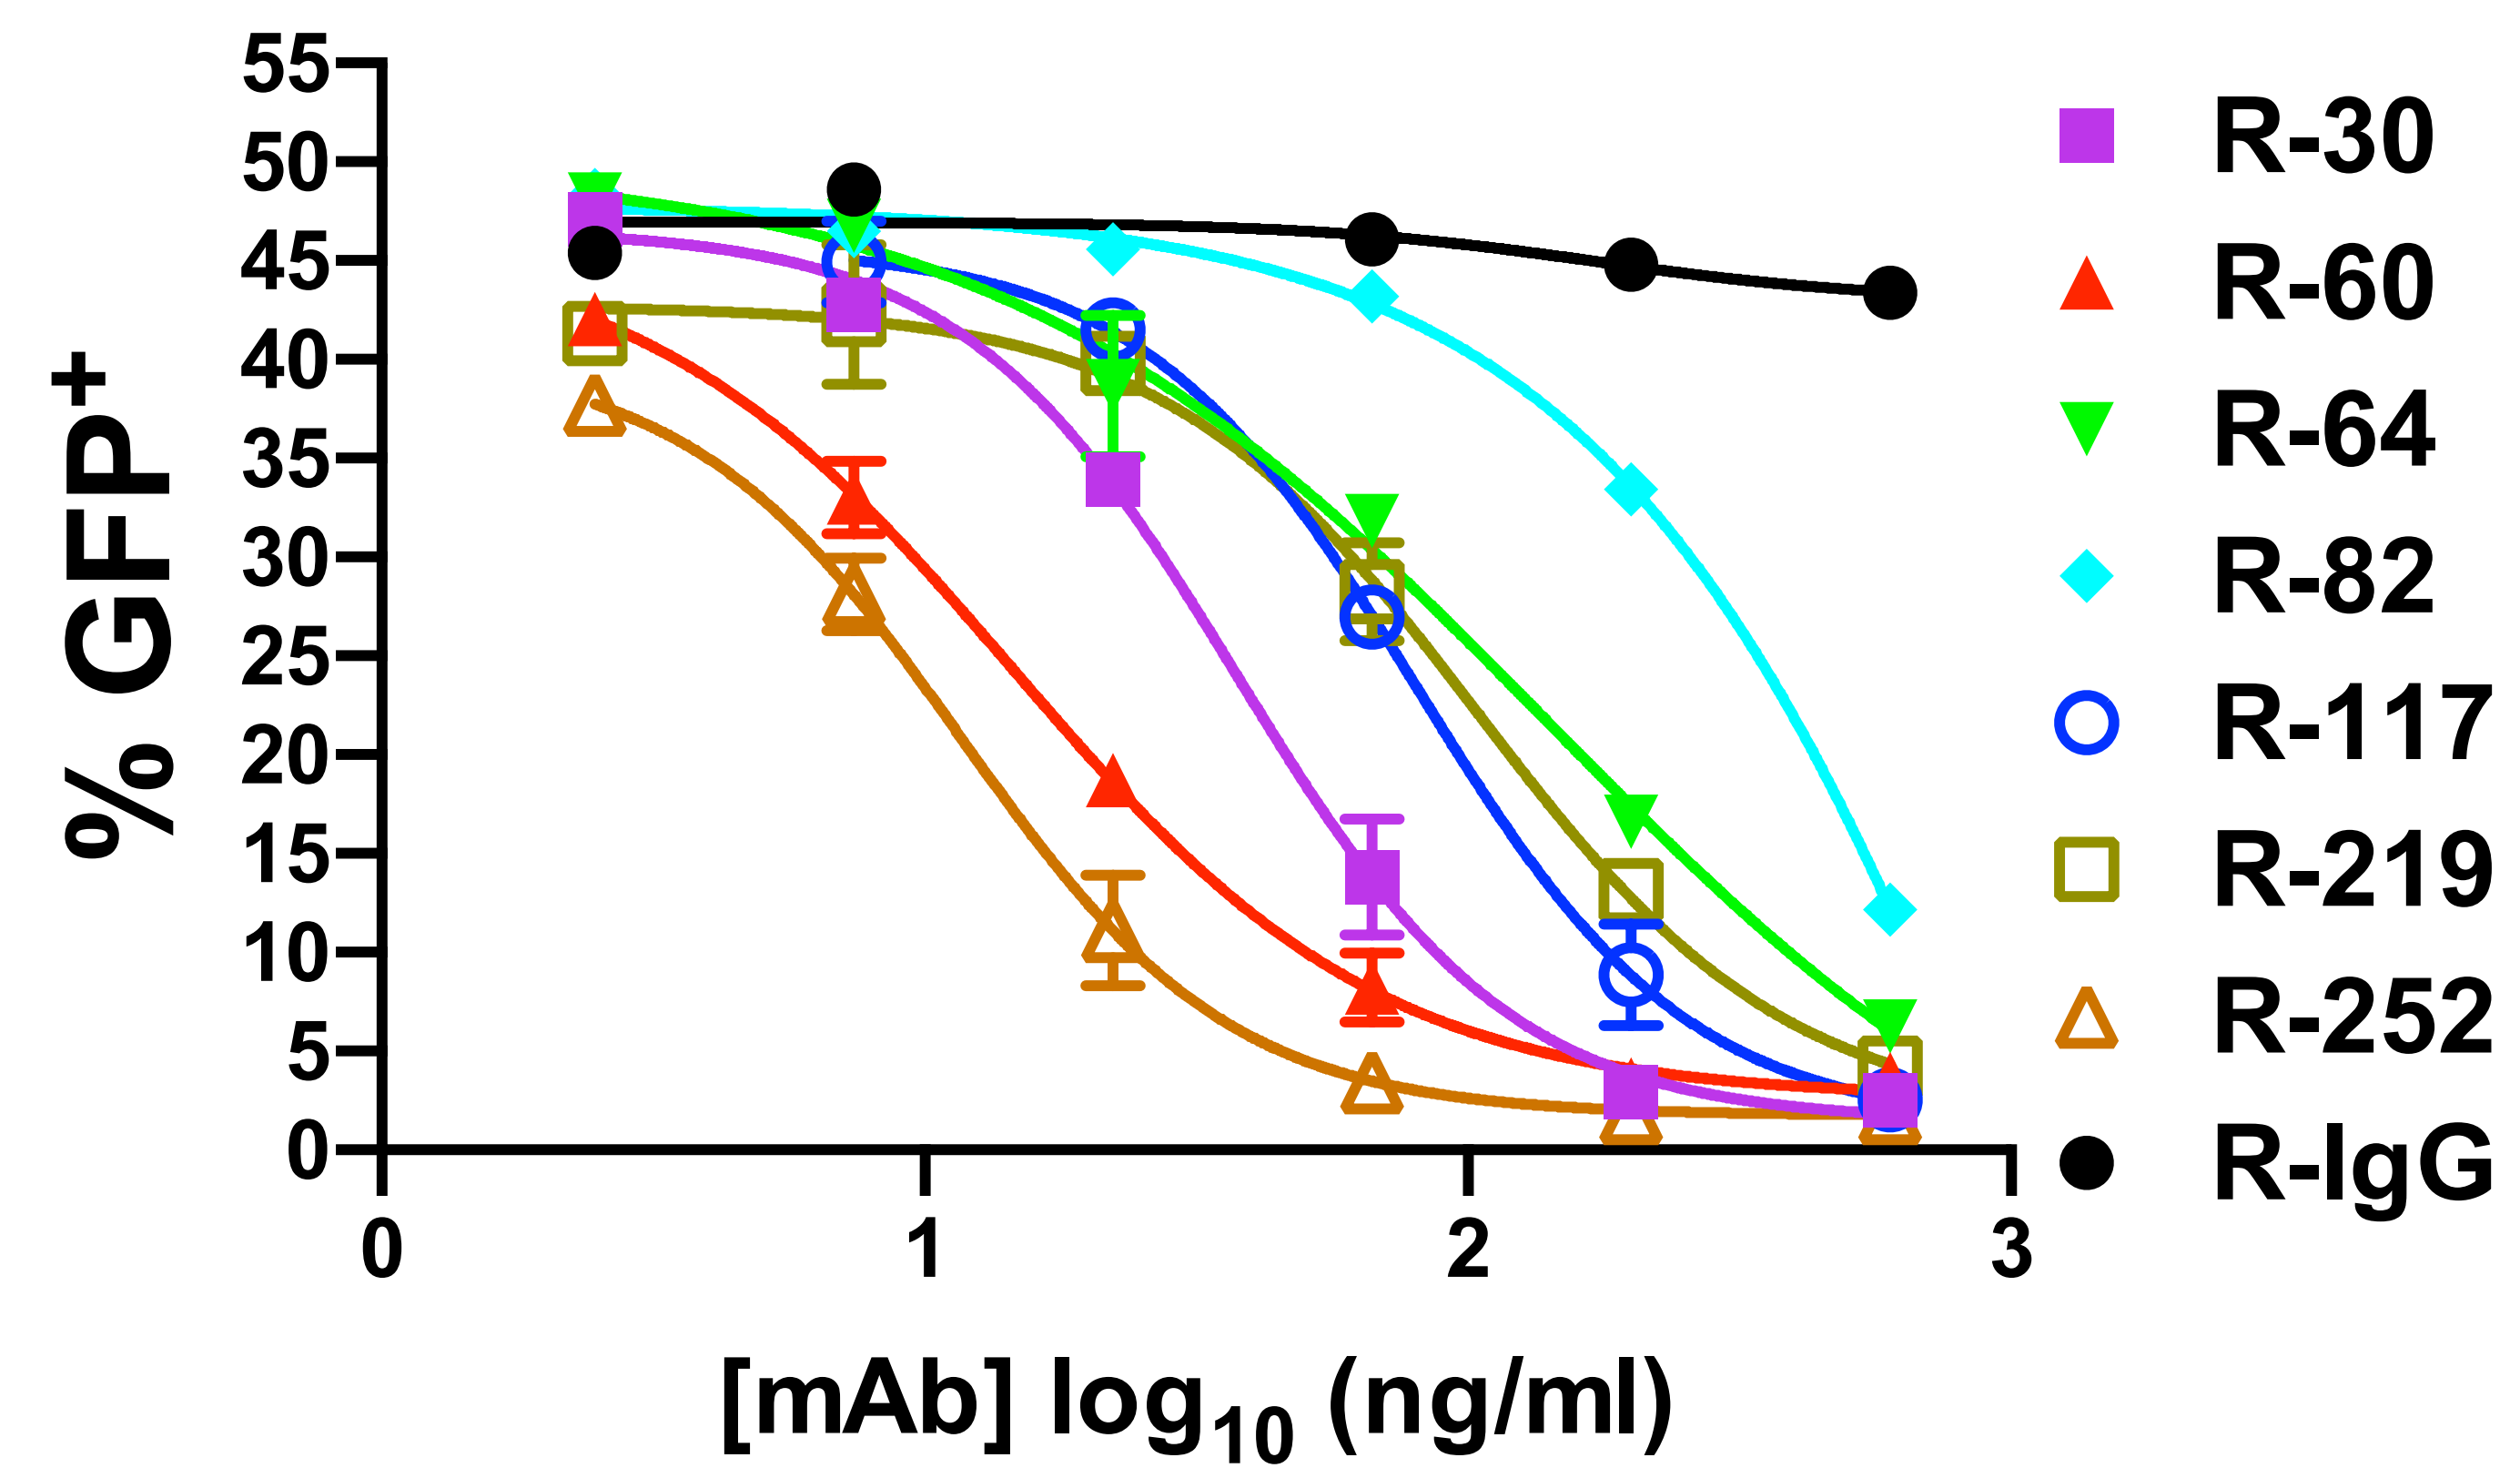**B**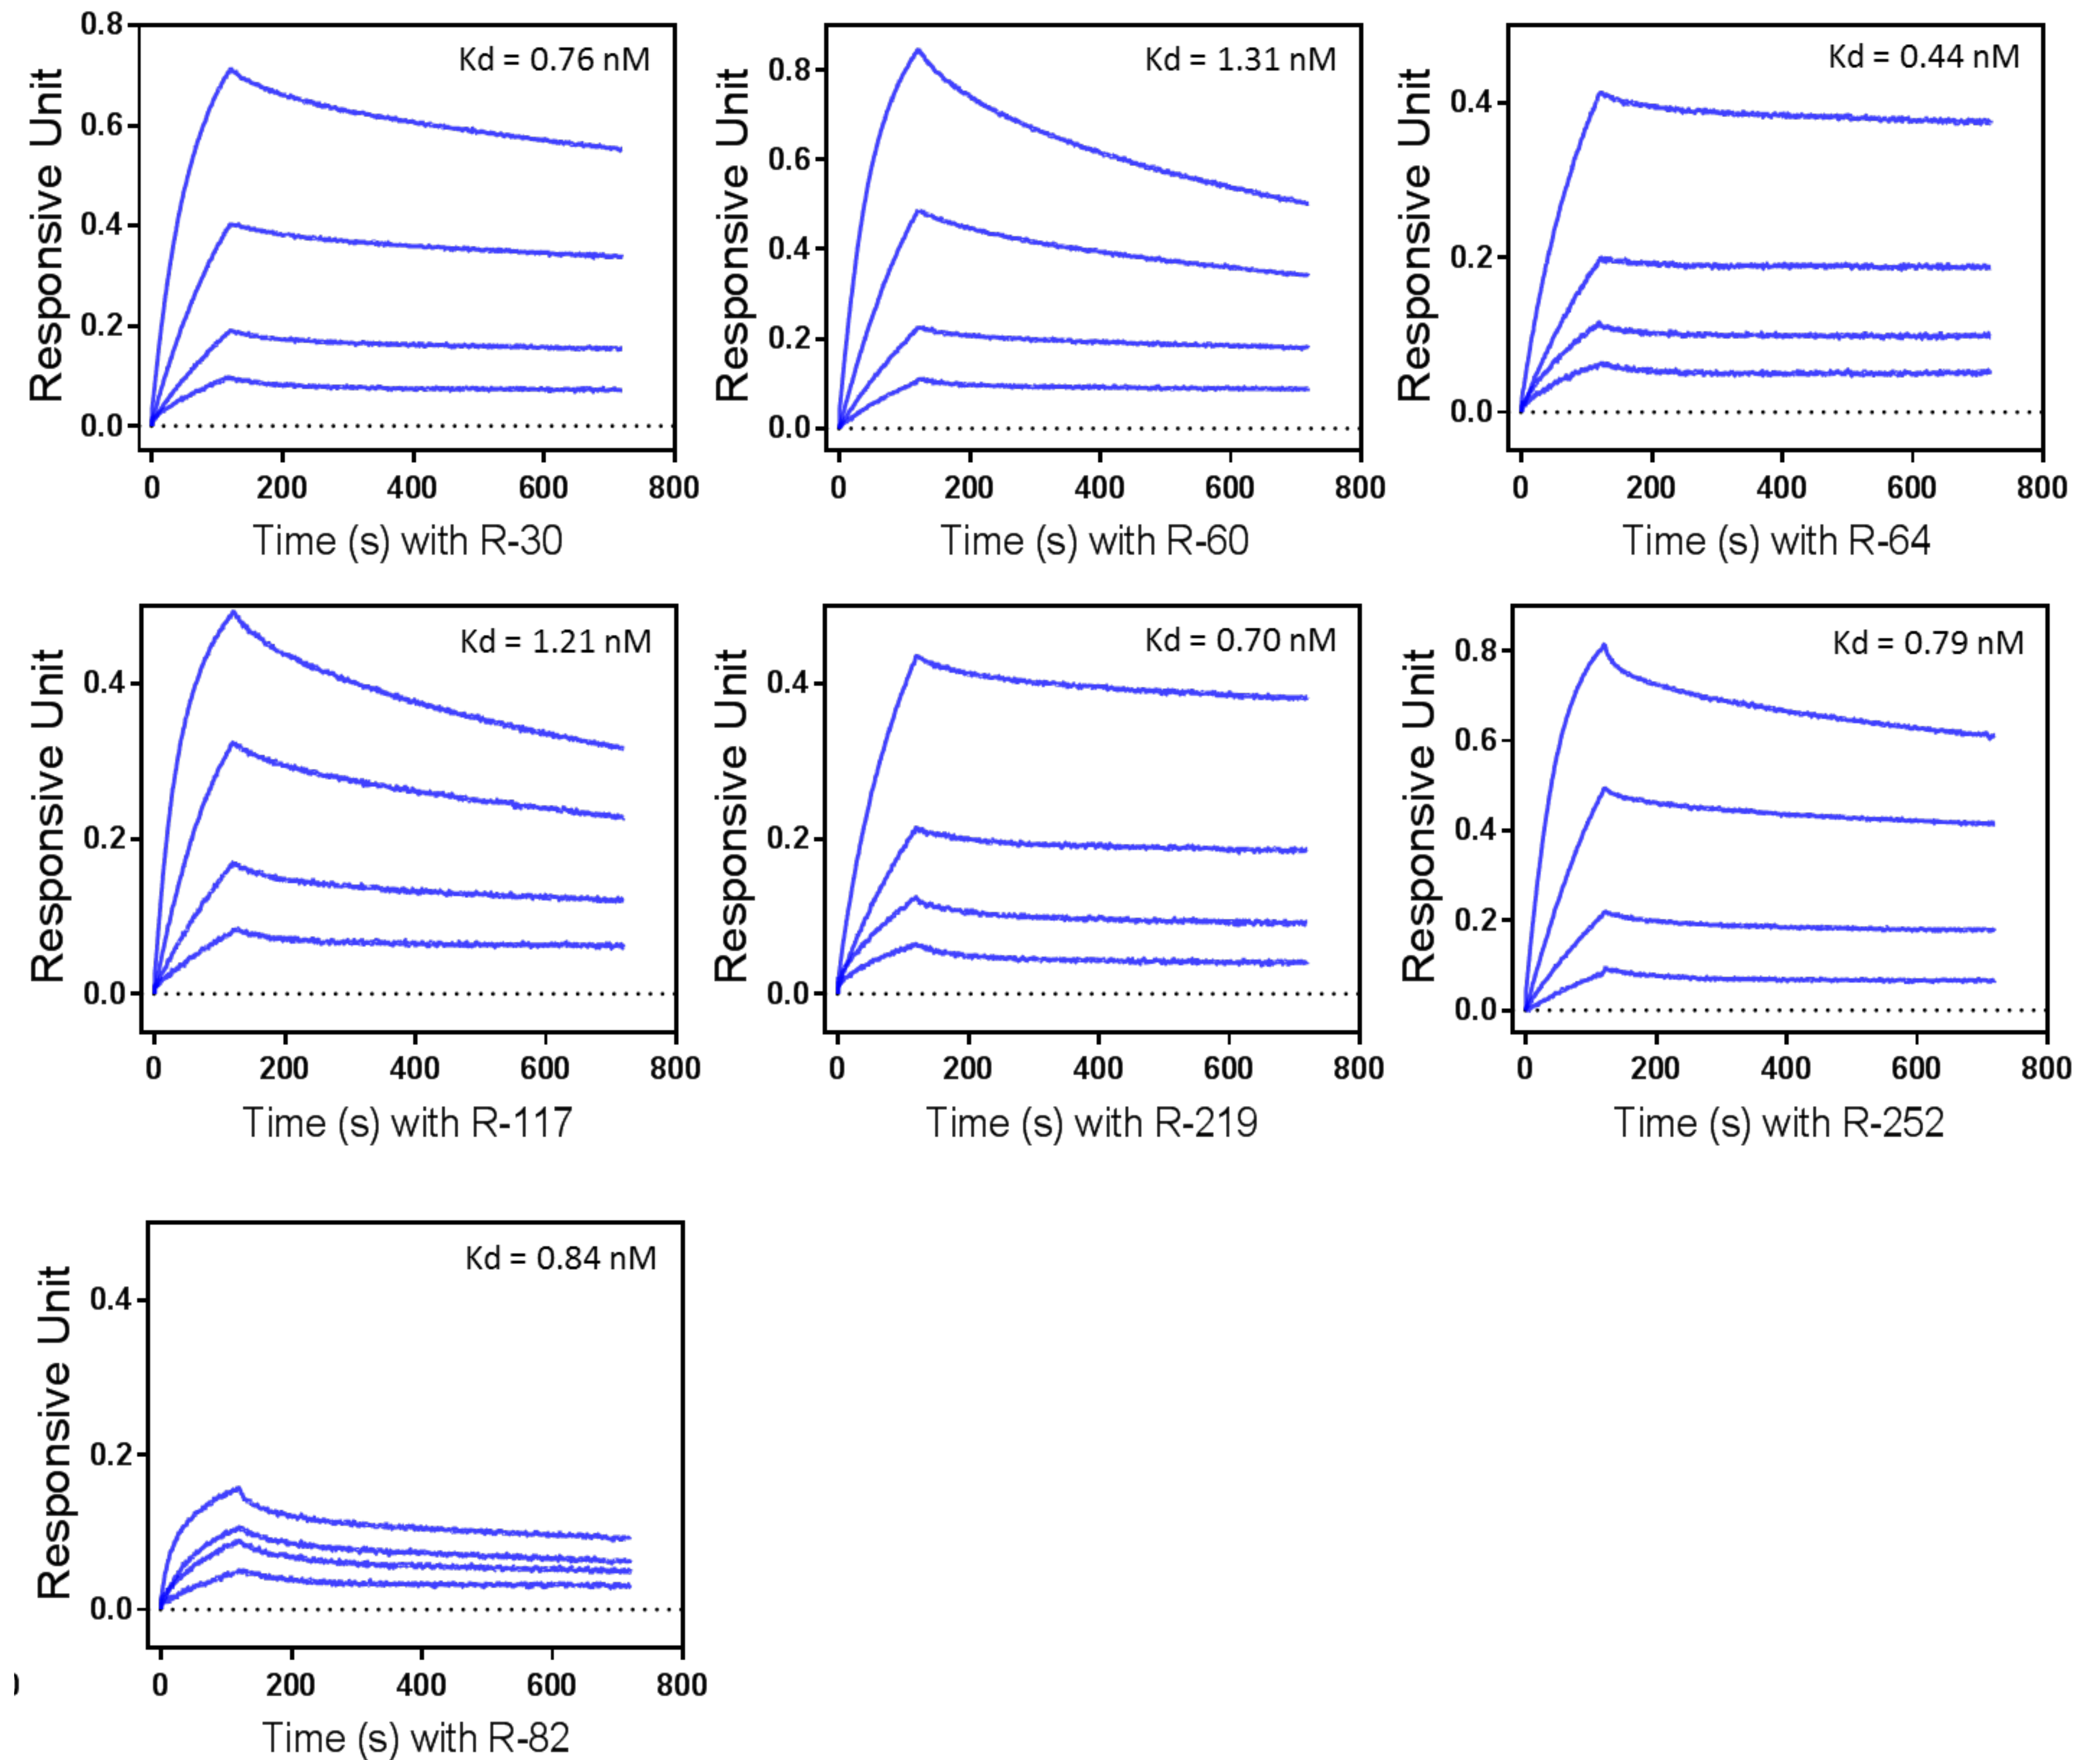

# Supplementary Fig 4

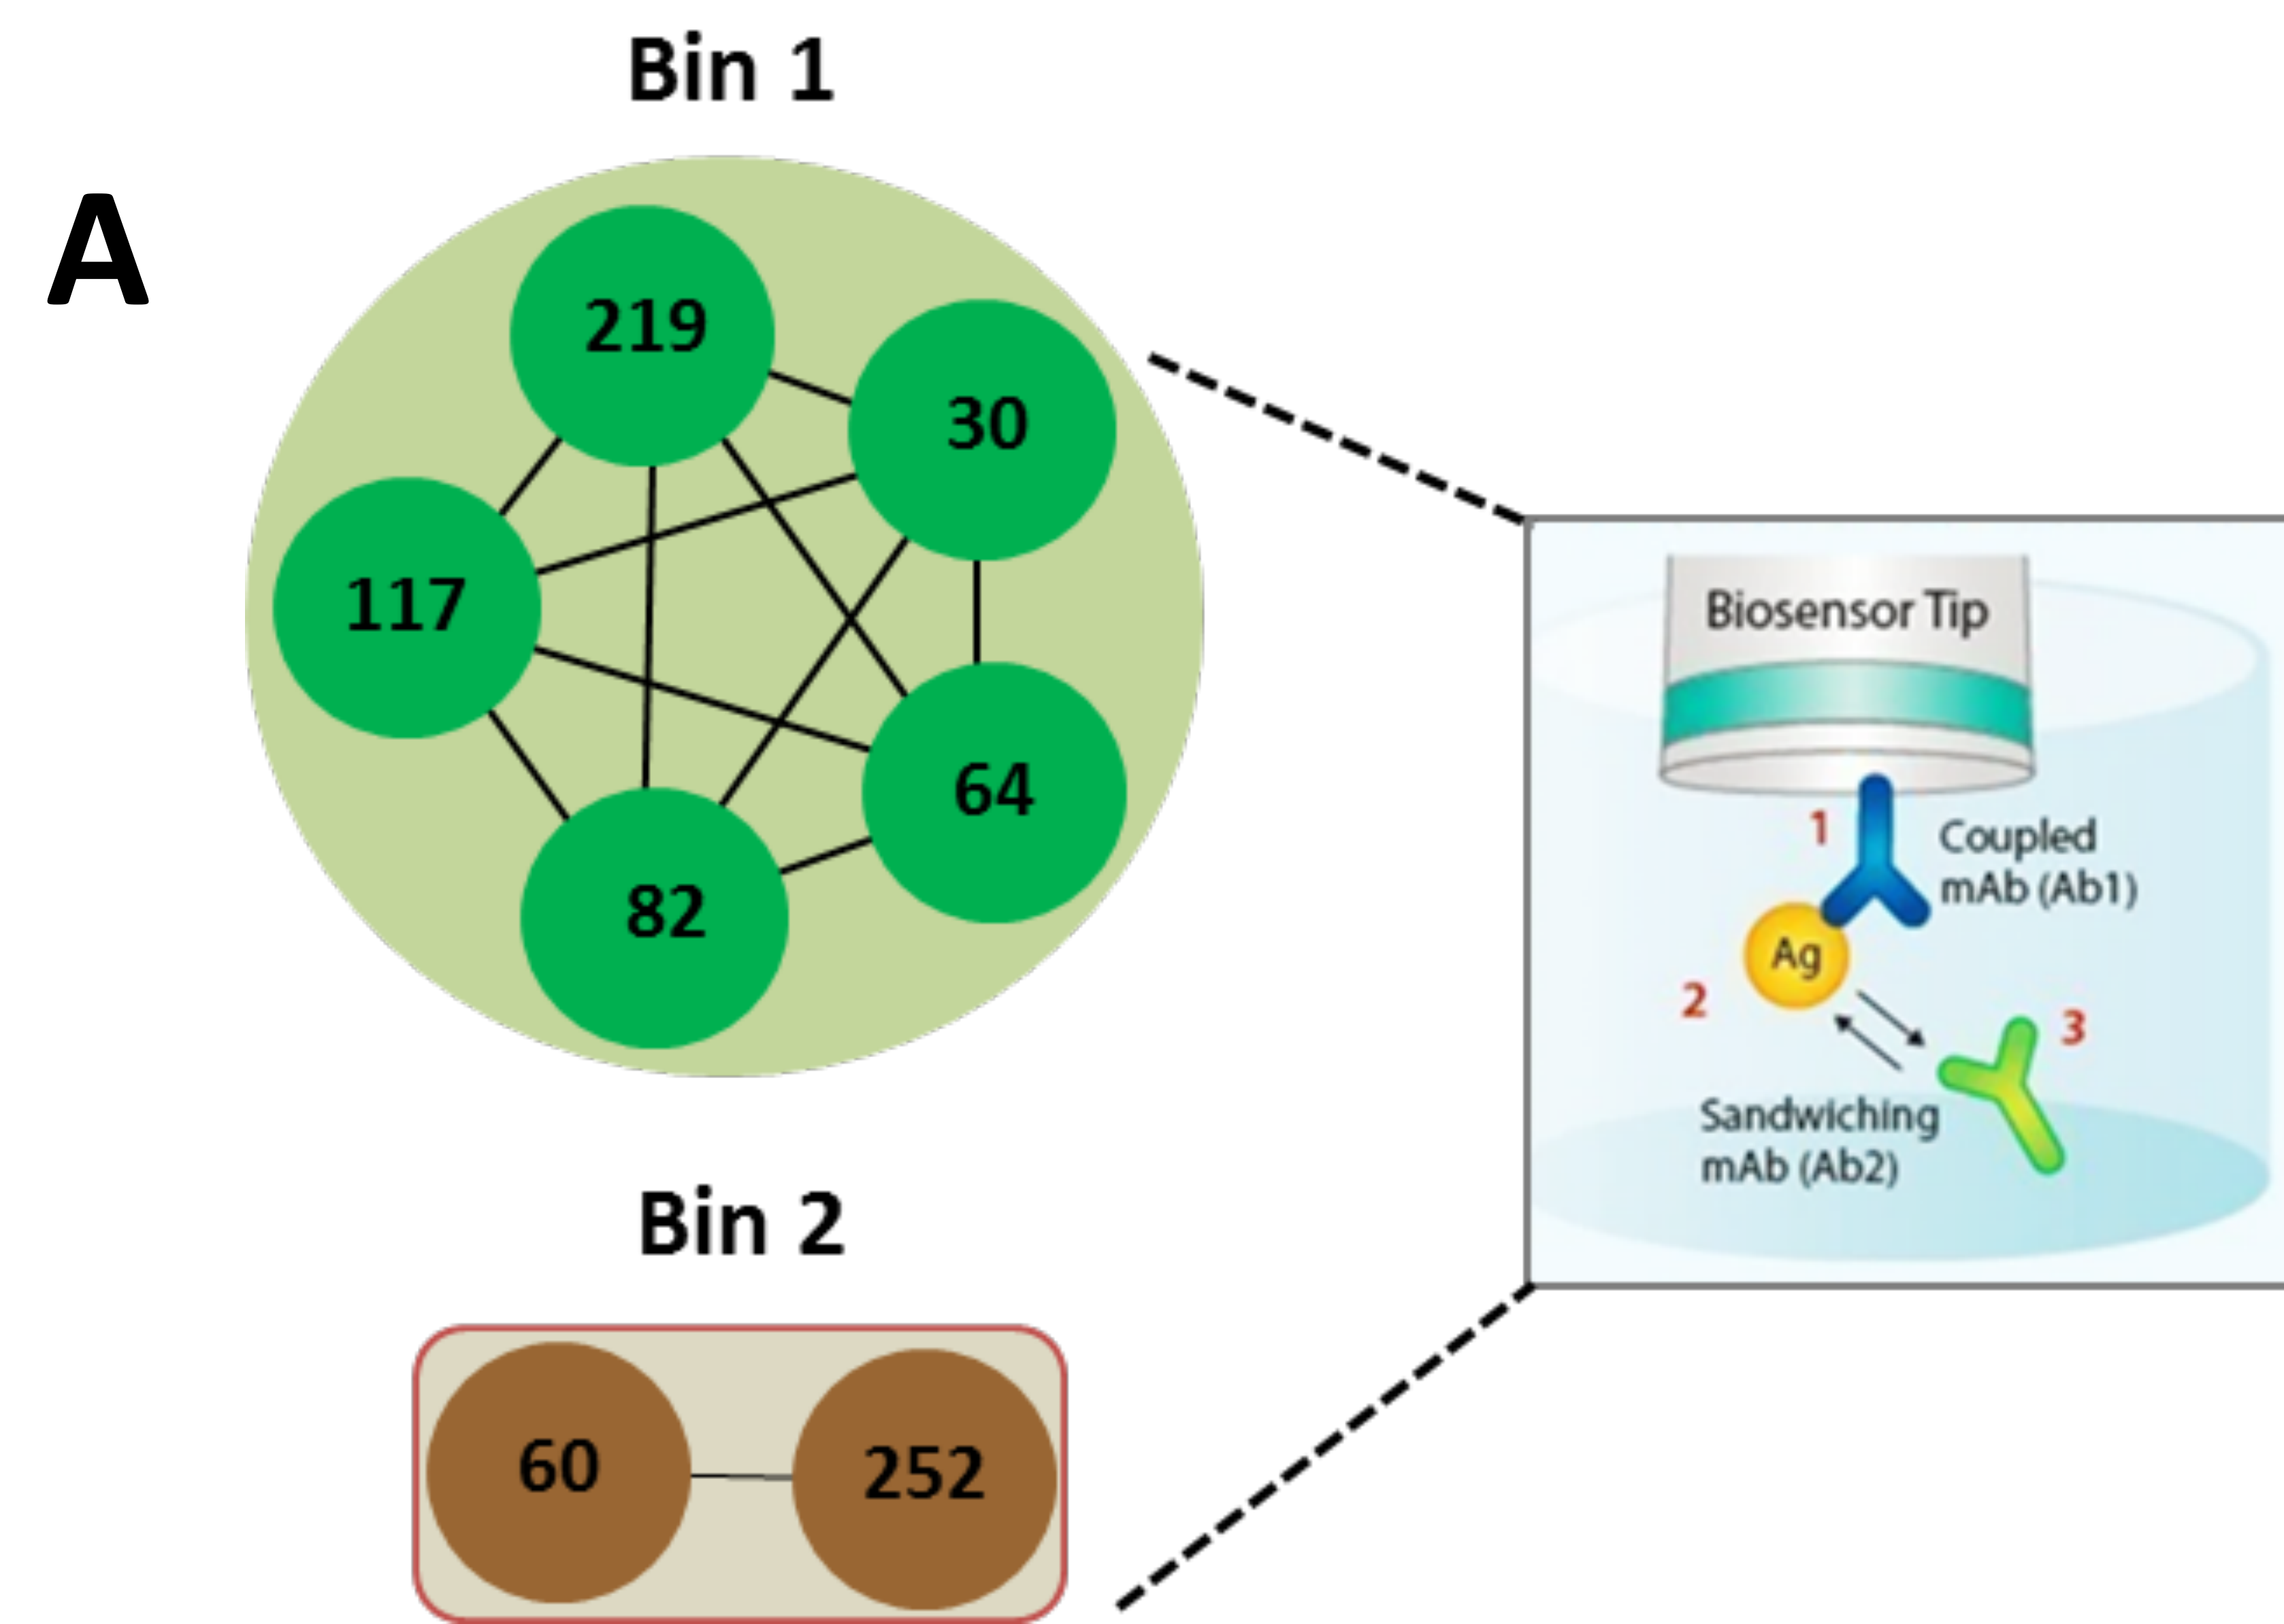

**B**

|       | Bin A |      |      |       |       | Bin B |       |
|-------|-------|------|------|-------|-------|-------|-------|
|       | R-30  | R-64 | R-82 | R-117 | R-219 | R-60  | R-252 |
| R-30  | +     | +    | +    | +     | +     |       |       |
| R-64  | +     | +    | +    | +     | +     |       |       |
| R-82  | +     | +    | +    | +     | +     |       |       |
| R-117 | +     | +    | +    | +     | +     |       |       |
| R-219 | +     | +    | +    | +     | +     |       |       |
| R-60  |       |      |      |       |       | +     | +     |
| R-252 |       |      |      |       |       | +     | +     |

# Supplementary Fig 5

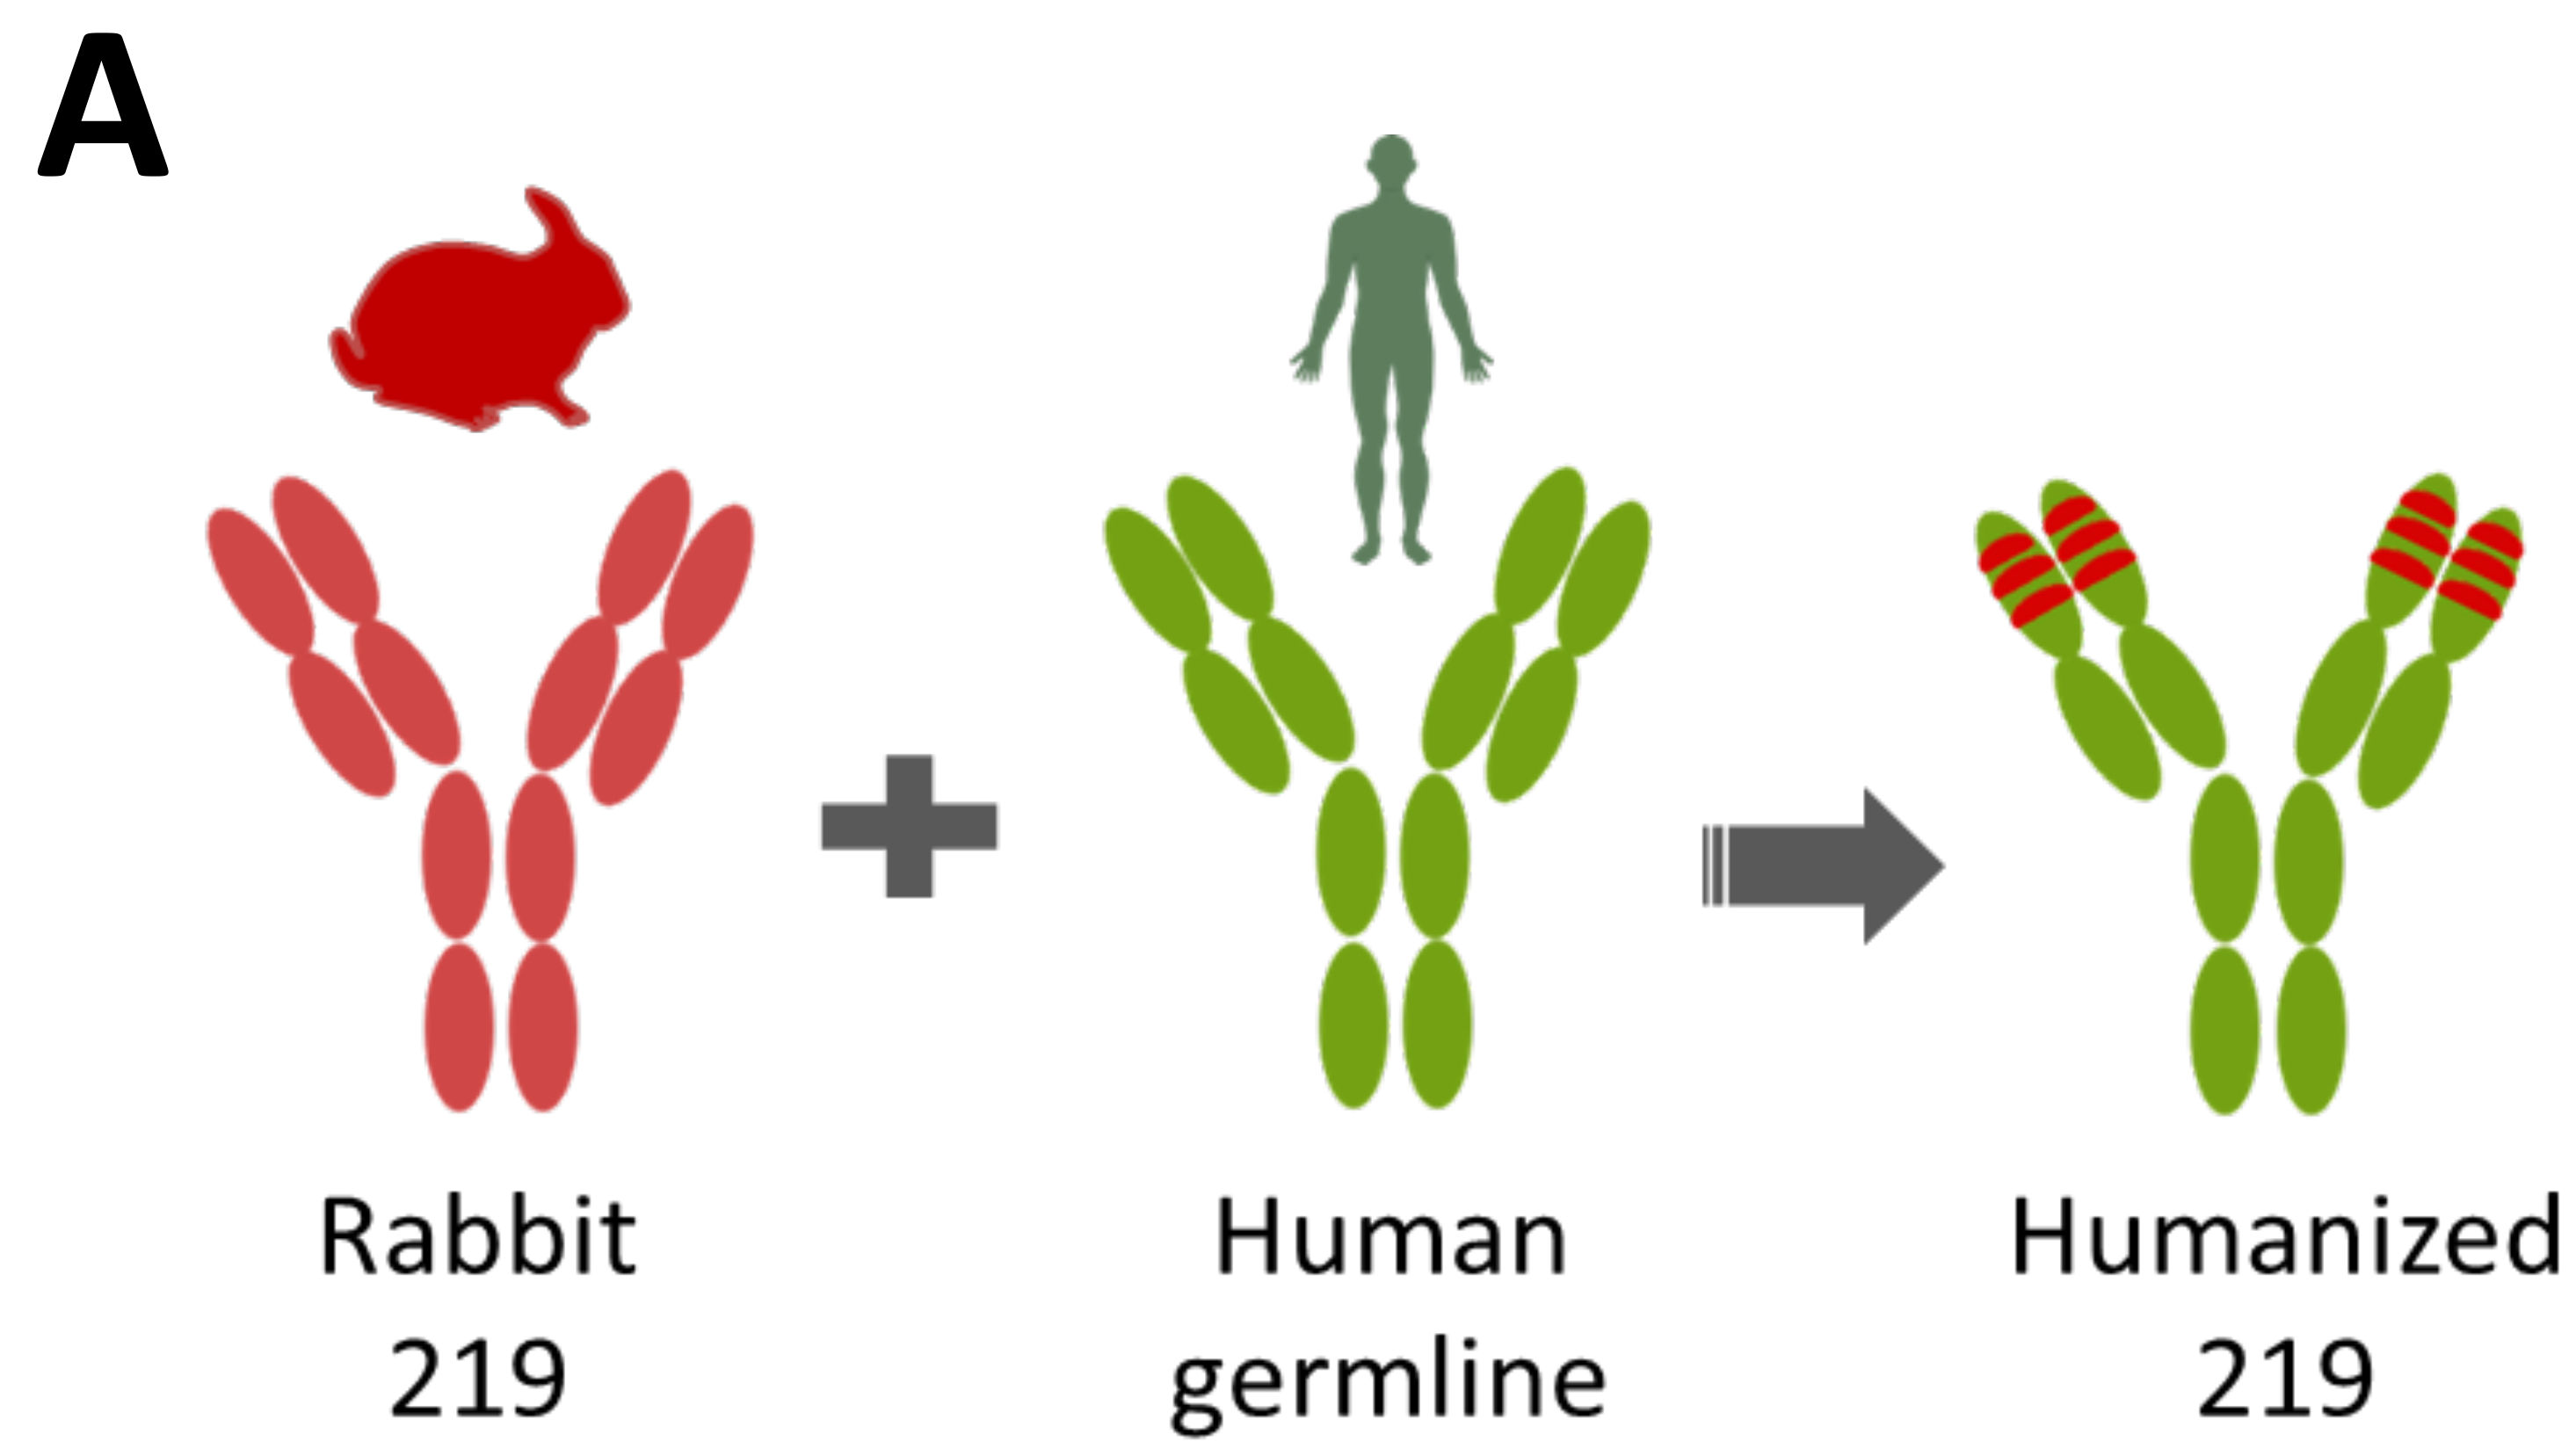

**B**

|             | CDR1-IMGT<br>(27-38)         | CDR2-IMGT<br>(56-65)                  | CDR3-IMGT<br>(105-117)            |
|-------------|------------------------------|---------------------------------------|-----------------------------------|
| IGHV3-53*01 | .....GFTVSSNYMS.....         | .....WVSVIYSGGSTYYADSVKG.....         | .....AR AEYFQH.....               |
| R-219-VH    | ..... <u>GFTVTRYMN</u> ..... | ..... <u>WIGYIYASSKTYANWAKG</u> ..... | ..... <u>ARGGVGNSGLNLDL</u> ..... |
| h219-VH1    | ..... <u>GFTVTRYMN</u> ..... | ..... <u>WIGYIYASSKTYANWAKG</u> ..... | ..... <u>ARGGVGNSGLNLDL</u> ..... |

  

|            | CDR1-IMGT<br>(27-38)             | CDR2-IMGT<br>(56-65)           | CDR3-IMGT<br>(105-117)          |
|------------|----------------------------------|--------------------------------|---------------------------------|
| IGKV1-5*03 | .....RASQSISWLAAY.....           | .....LLIYKASSLES.....          | .....QQYNSYS...LT.....          |
| R-219-VK   | ..... <u>QASQSIGSWLAAY</u> ..... | ..... <u>LLIYQASRLAS</u> ..... | ..... <u>QQAEYSGDVENT</u> ..... |
| h219-VK1   | ..... <u>QASQSIGSWLAAY</u> ..... | ..... <u>LLIYQASRLAS</u> ..... | ..... <u>QQAEYSGDVENT</u> ..... |

**C**

|           | CDR1-IMGT<br>(27-38)         | CDR2-IMGT<br>(56-65)                  | CDR3-IMGT<br>(105-117)            |
|-----------|------------------------------|---------------------------------------|-----------------------------------|
| h219-VH1  | ..... <u>GFTVTRYMN</u> ..... | ..... <u>WIGYIYASSKTYANWAKG</u> ..... | ..... <u>ARGGVGNSGLNLDL</u> ..... |
| h219-VH2  | ..... <u>GFTVTRYMN</u> ..... | ..... <u>WIGYIYASSKTYANWAKG</u> ..... | ..... <u>ARGGVGNVGLNLDL</u> ..... |
| h219-VH4  | ..... <u>GFTVTRYMN</u> ..... | ..... <u>WIGYIYASSKTYANWAKG</u> ..... | ..... <u>ARGGVGNQGLNLDL</u> ..... |
| h219-VH5  | ..... <u>GFTVTRYMN</u> ..... | ..... <u>WIGYIYASSKTYANWAKG</u> ..... | ..... <u>ARGGVGVSGLNLDL</u> ..... |
| h219-VH6  | ..... <u>GFTVTRYMN</u> ..... | ..... <u>WIGYIYASSKTYANWAKG</u> ..... | ..... <u>ARGGVGDSGLNLDL</u> ..... |
| h219-VH7  | ..... <u>GFTVTRYMN</u> ..... | ..... <u>WIGYIYASSKTYANWAKG</u> ..... | ..... <u>ARGGVGESGLNLDL</u> ..... |
| h219-VH8  | ..... <u>GFTVTRYMN</u> ..... | ..... <u>WIGYIYASSKTYANWAKG</u> ..... | ..... <u>ARGGVGQSGLNLDL</u> ..... |
| h219-VH9  | ..... <u>GFTVTRYMN</u> ..... | ..... <u>WIGYIYASSKTYANWAKG</u> ..... | ..... <u>ARGGVGSSGLNLDL</u> ..... |
| h219-VH10 | ..... <u>GFTVTRYMN</u> ..... | ..... <u>WIGYIYASSKTYANWAKG</u> ..... | ..... <u>ARGGVGTSGLNLDL</u> ..... |

|          | CDR1-IMGT<br>(27-38)             | CDR2-IMGT<br>(56-65)           | CDR3-IMGT<br>(105-117)          |
|----------|----------------------------------|--------------------------------|---------------------------------|
| h219-VK1 | ..... <u>QASQSIGSWLAAY</u> ..... | ..... <u>LLIYQASRLAS</u> ..... | ..... <u>QQAEYSGDVENT</u> ..... |
| h219-VK2 | ..... <u>RASQSIGSWLAAY</u> ..... | ..... <u>LLIYQASRLAS</u> ..... | ..... <u>QQAEYSGDVENV</u> ..... |
| h219-VK3 | ..... <u>RASQSIGSWLAAY</u> ..... | ..... <u>LLIYQASRLAS</u> ..... | ..... <u>QQAEYSGDVEDT</u> ..... |

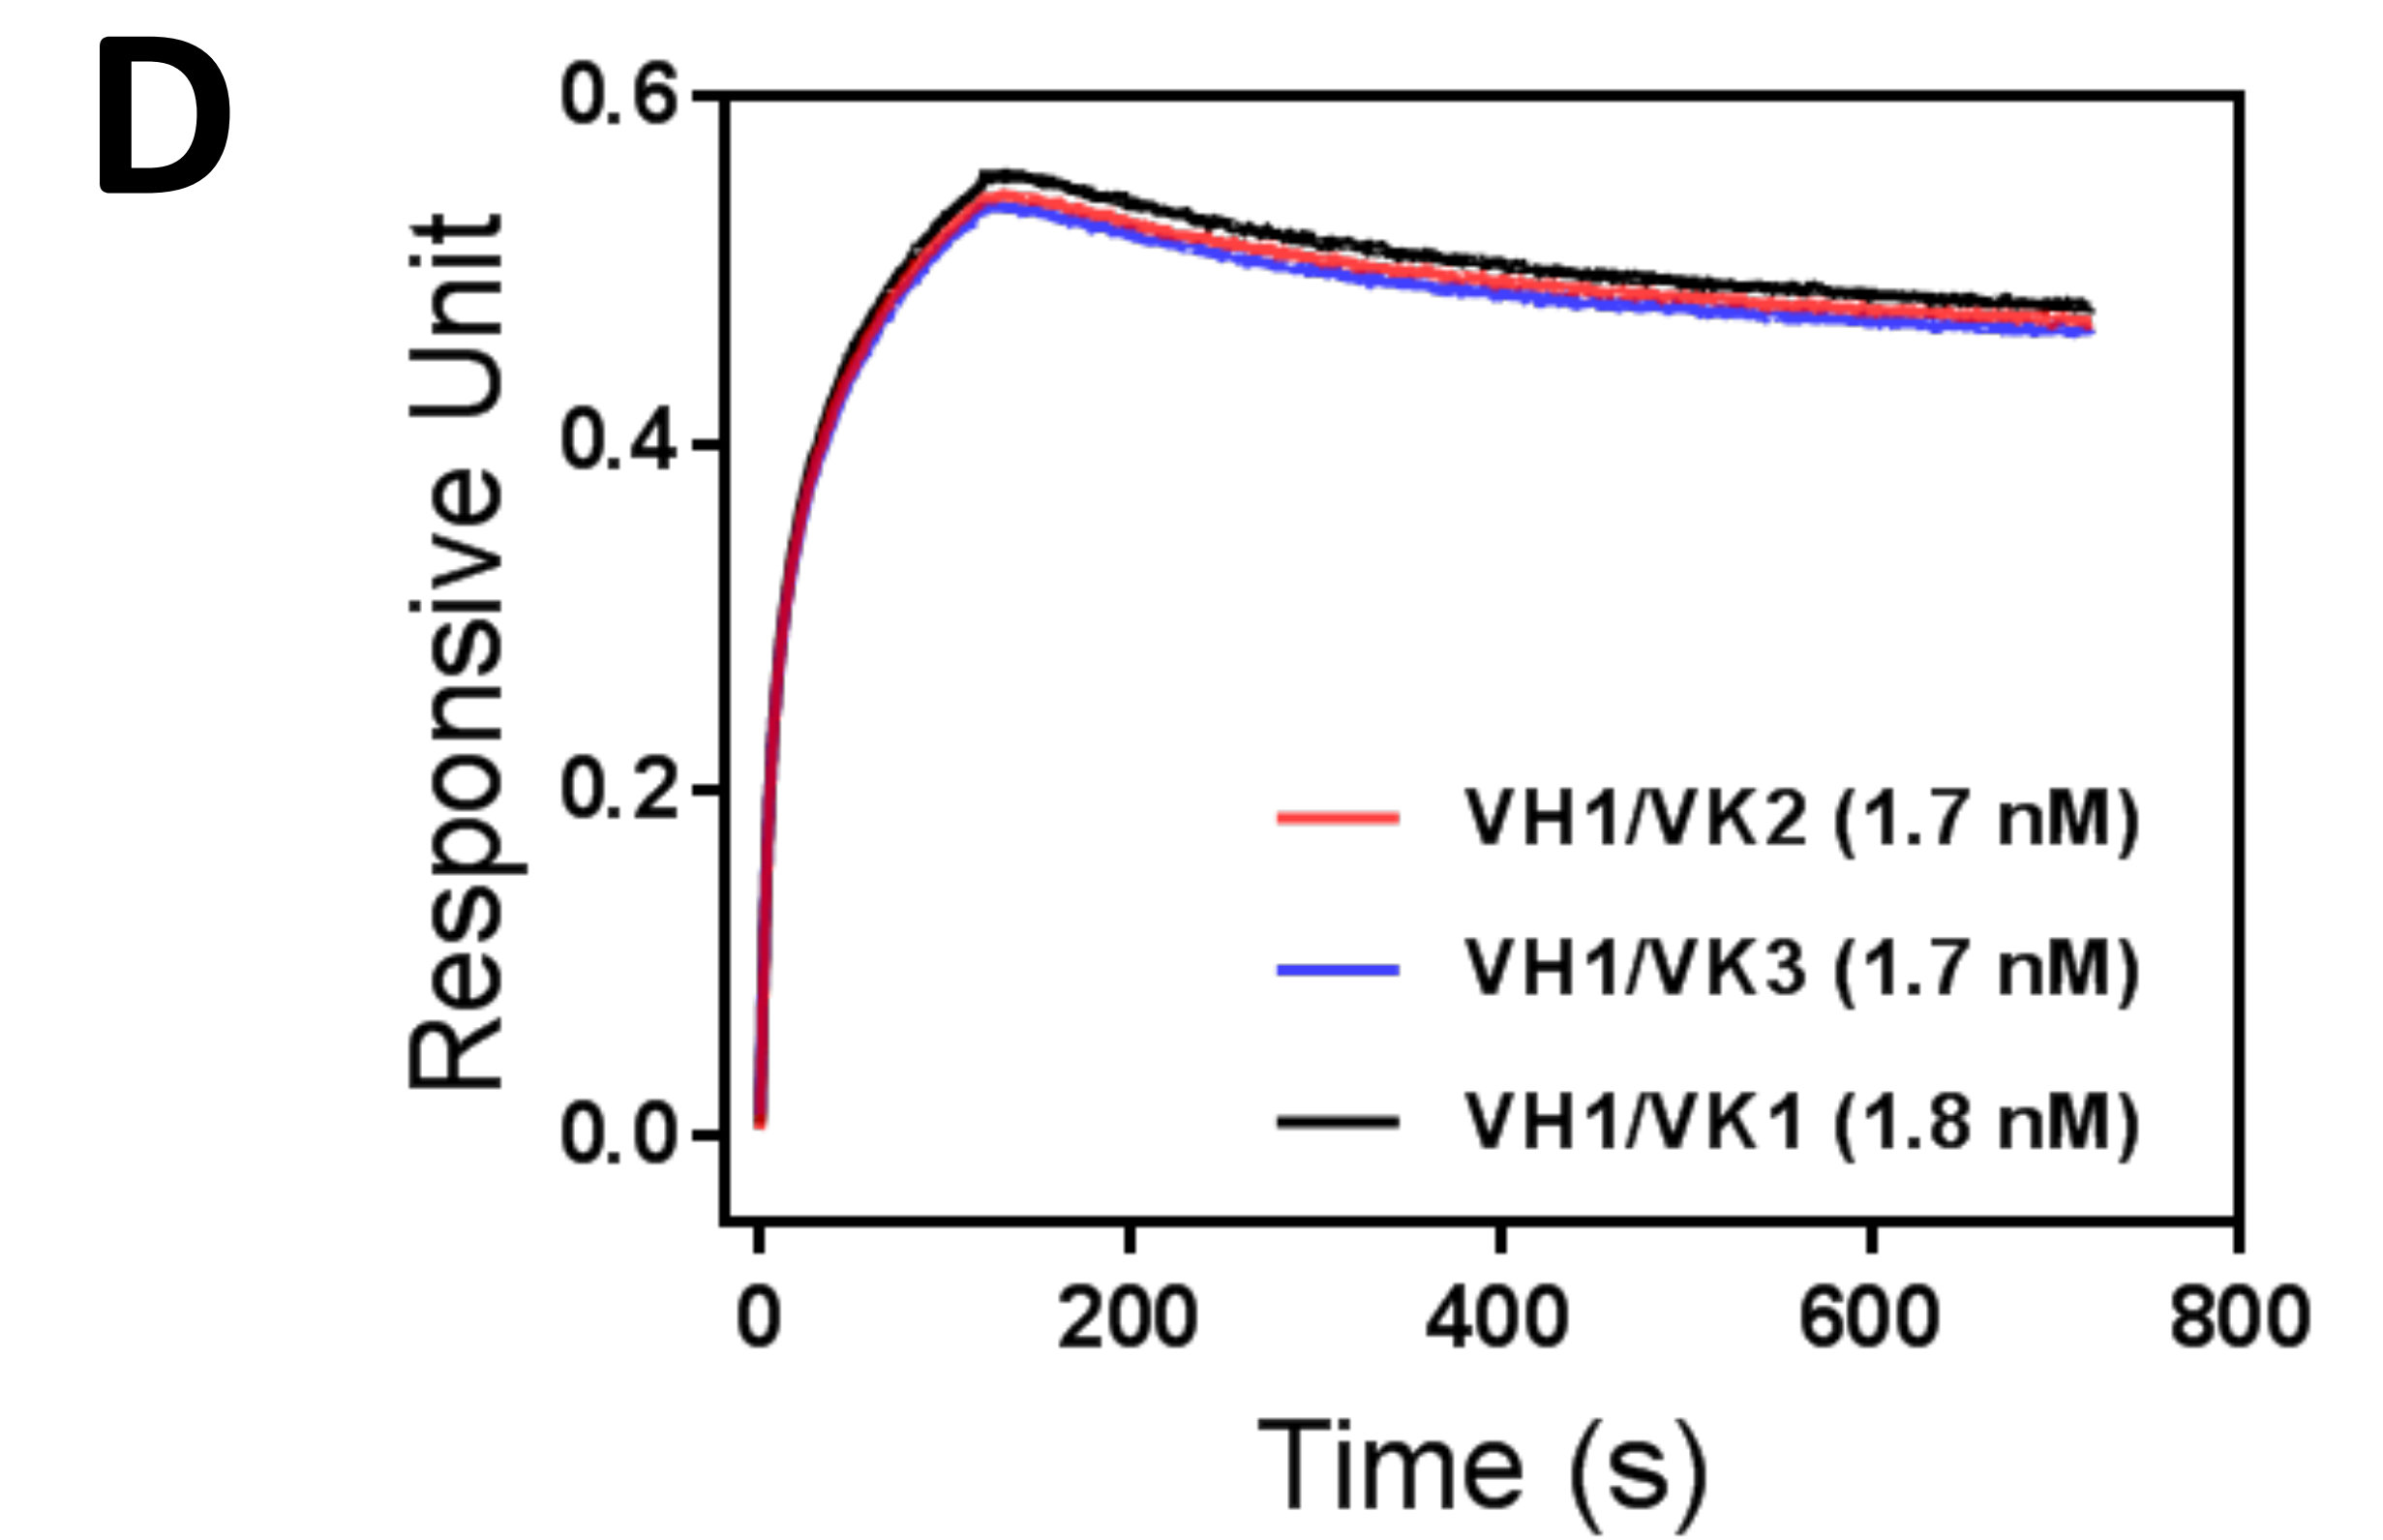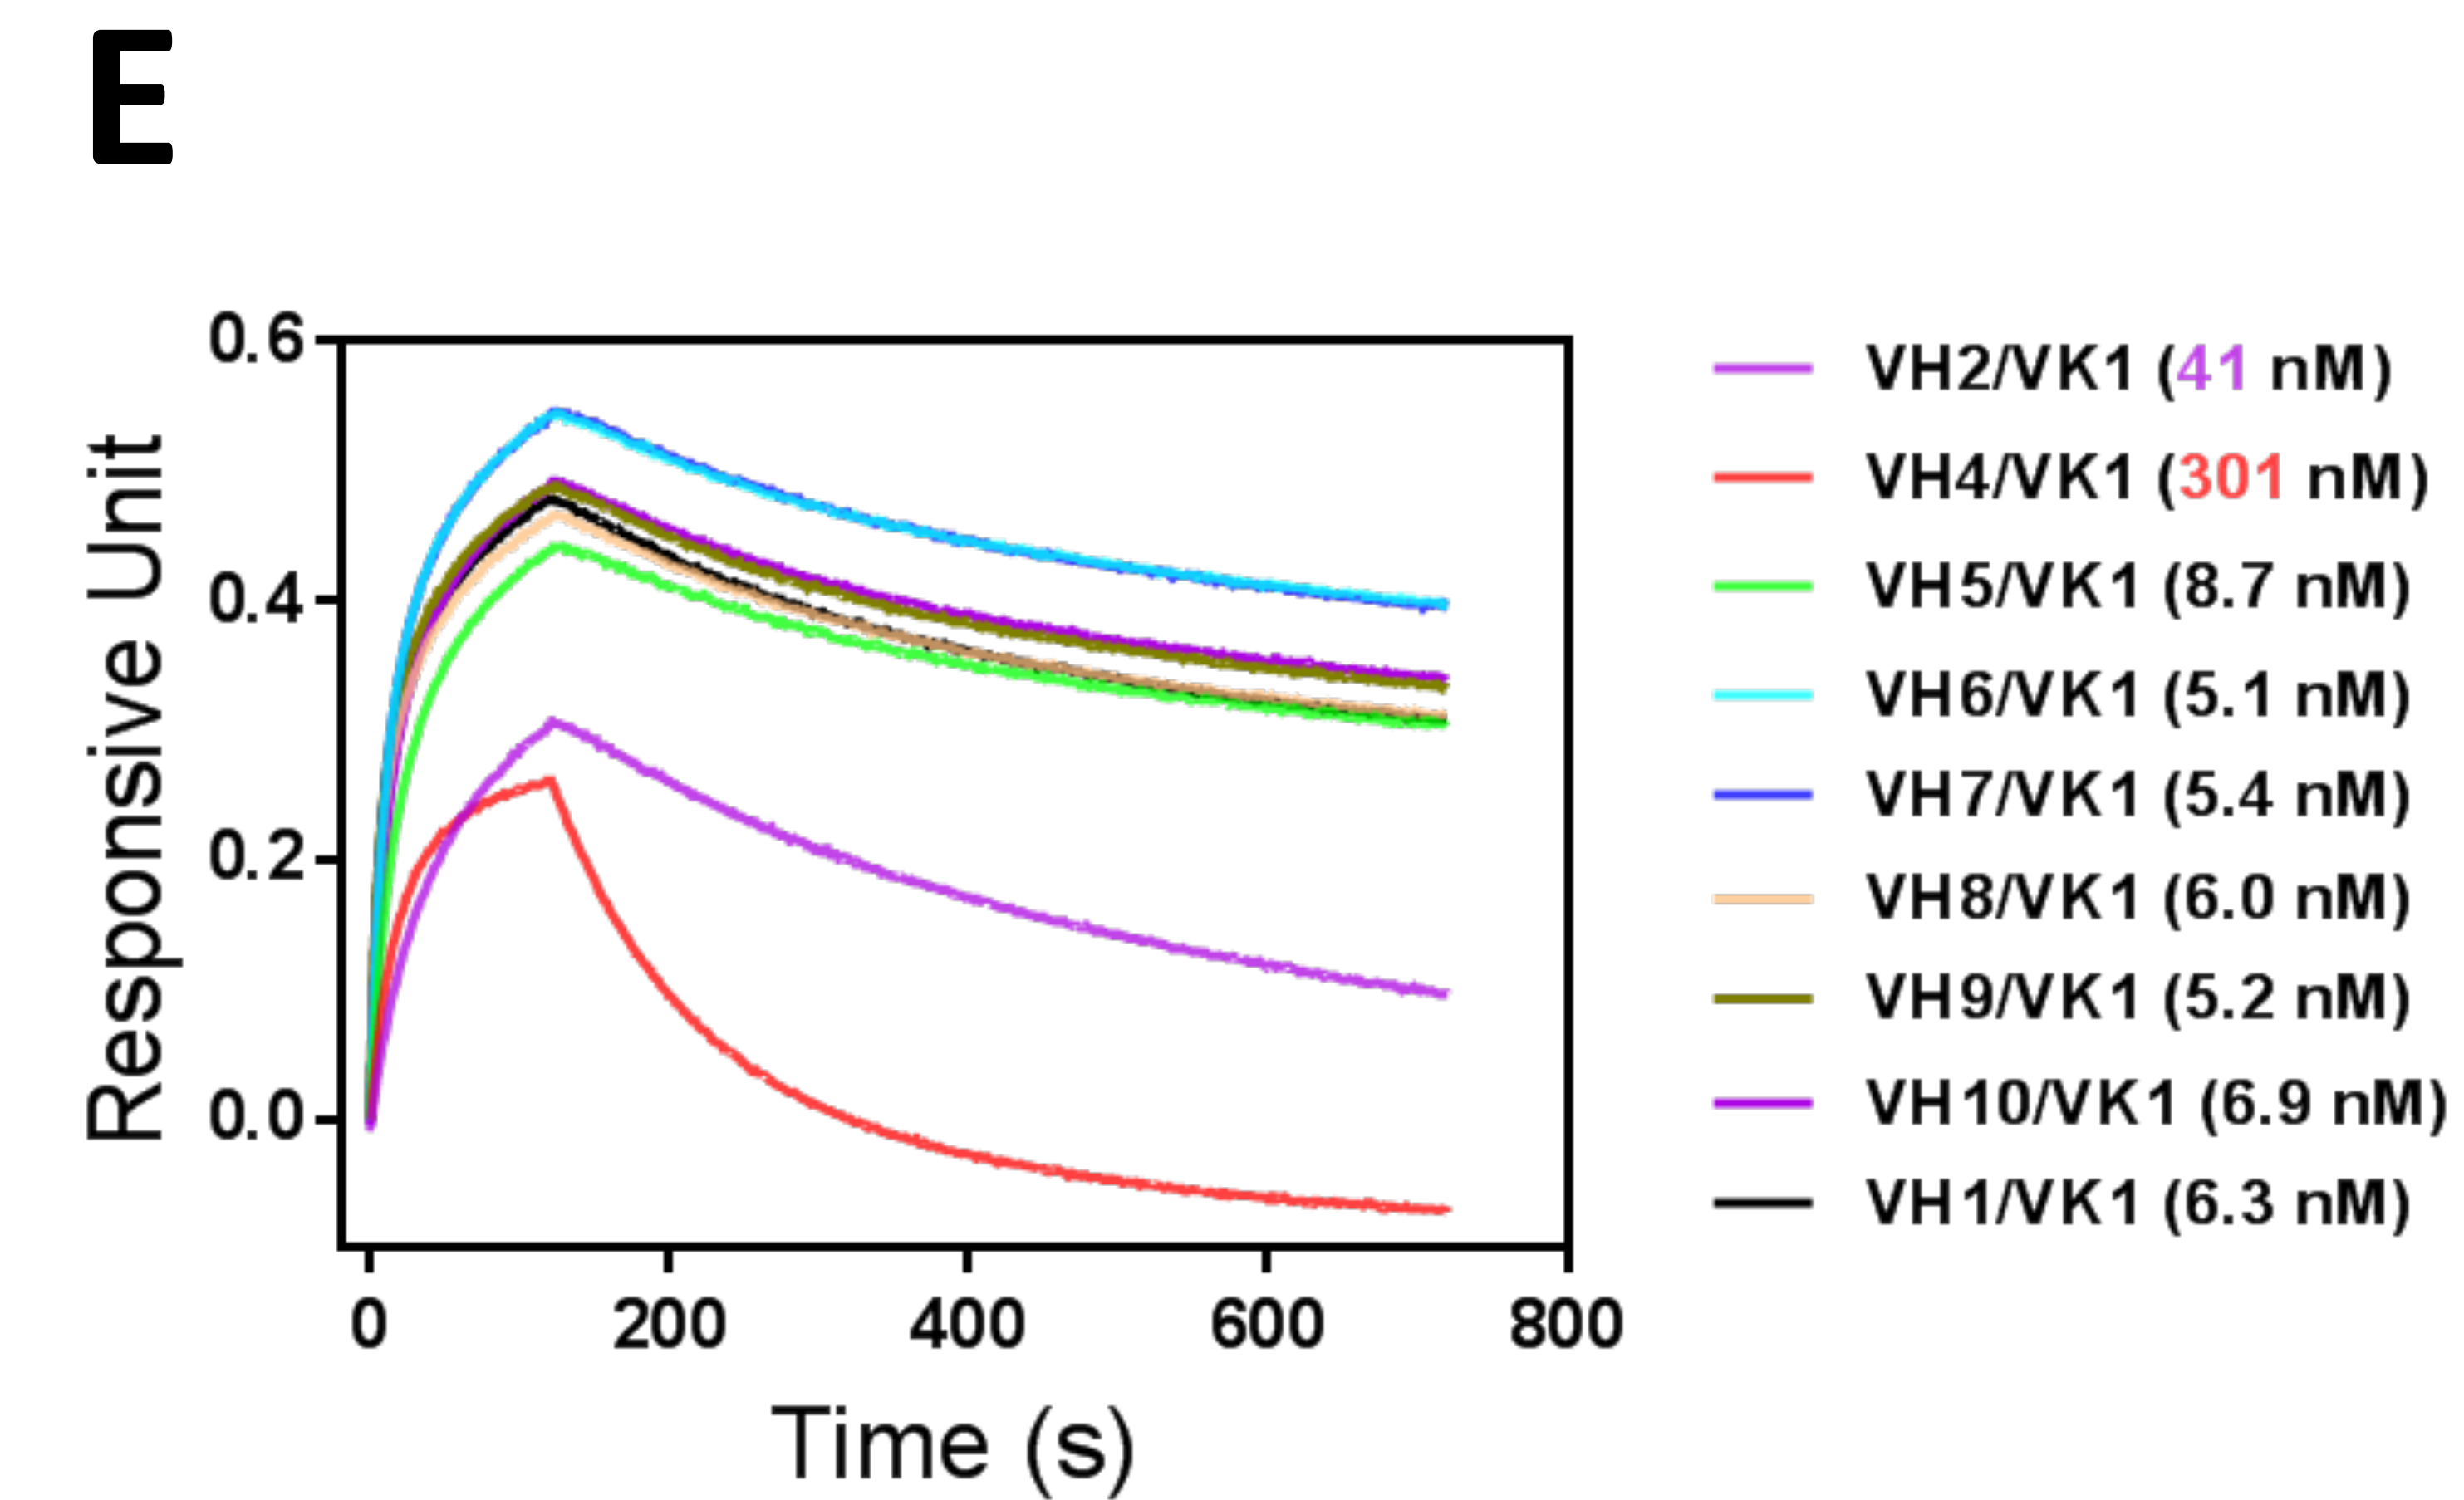

# Supplementary Fig 6

**A**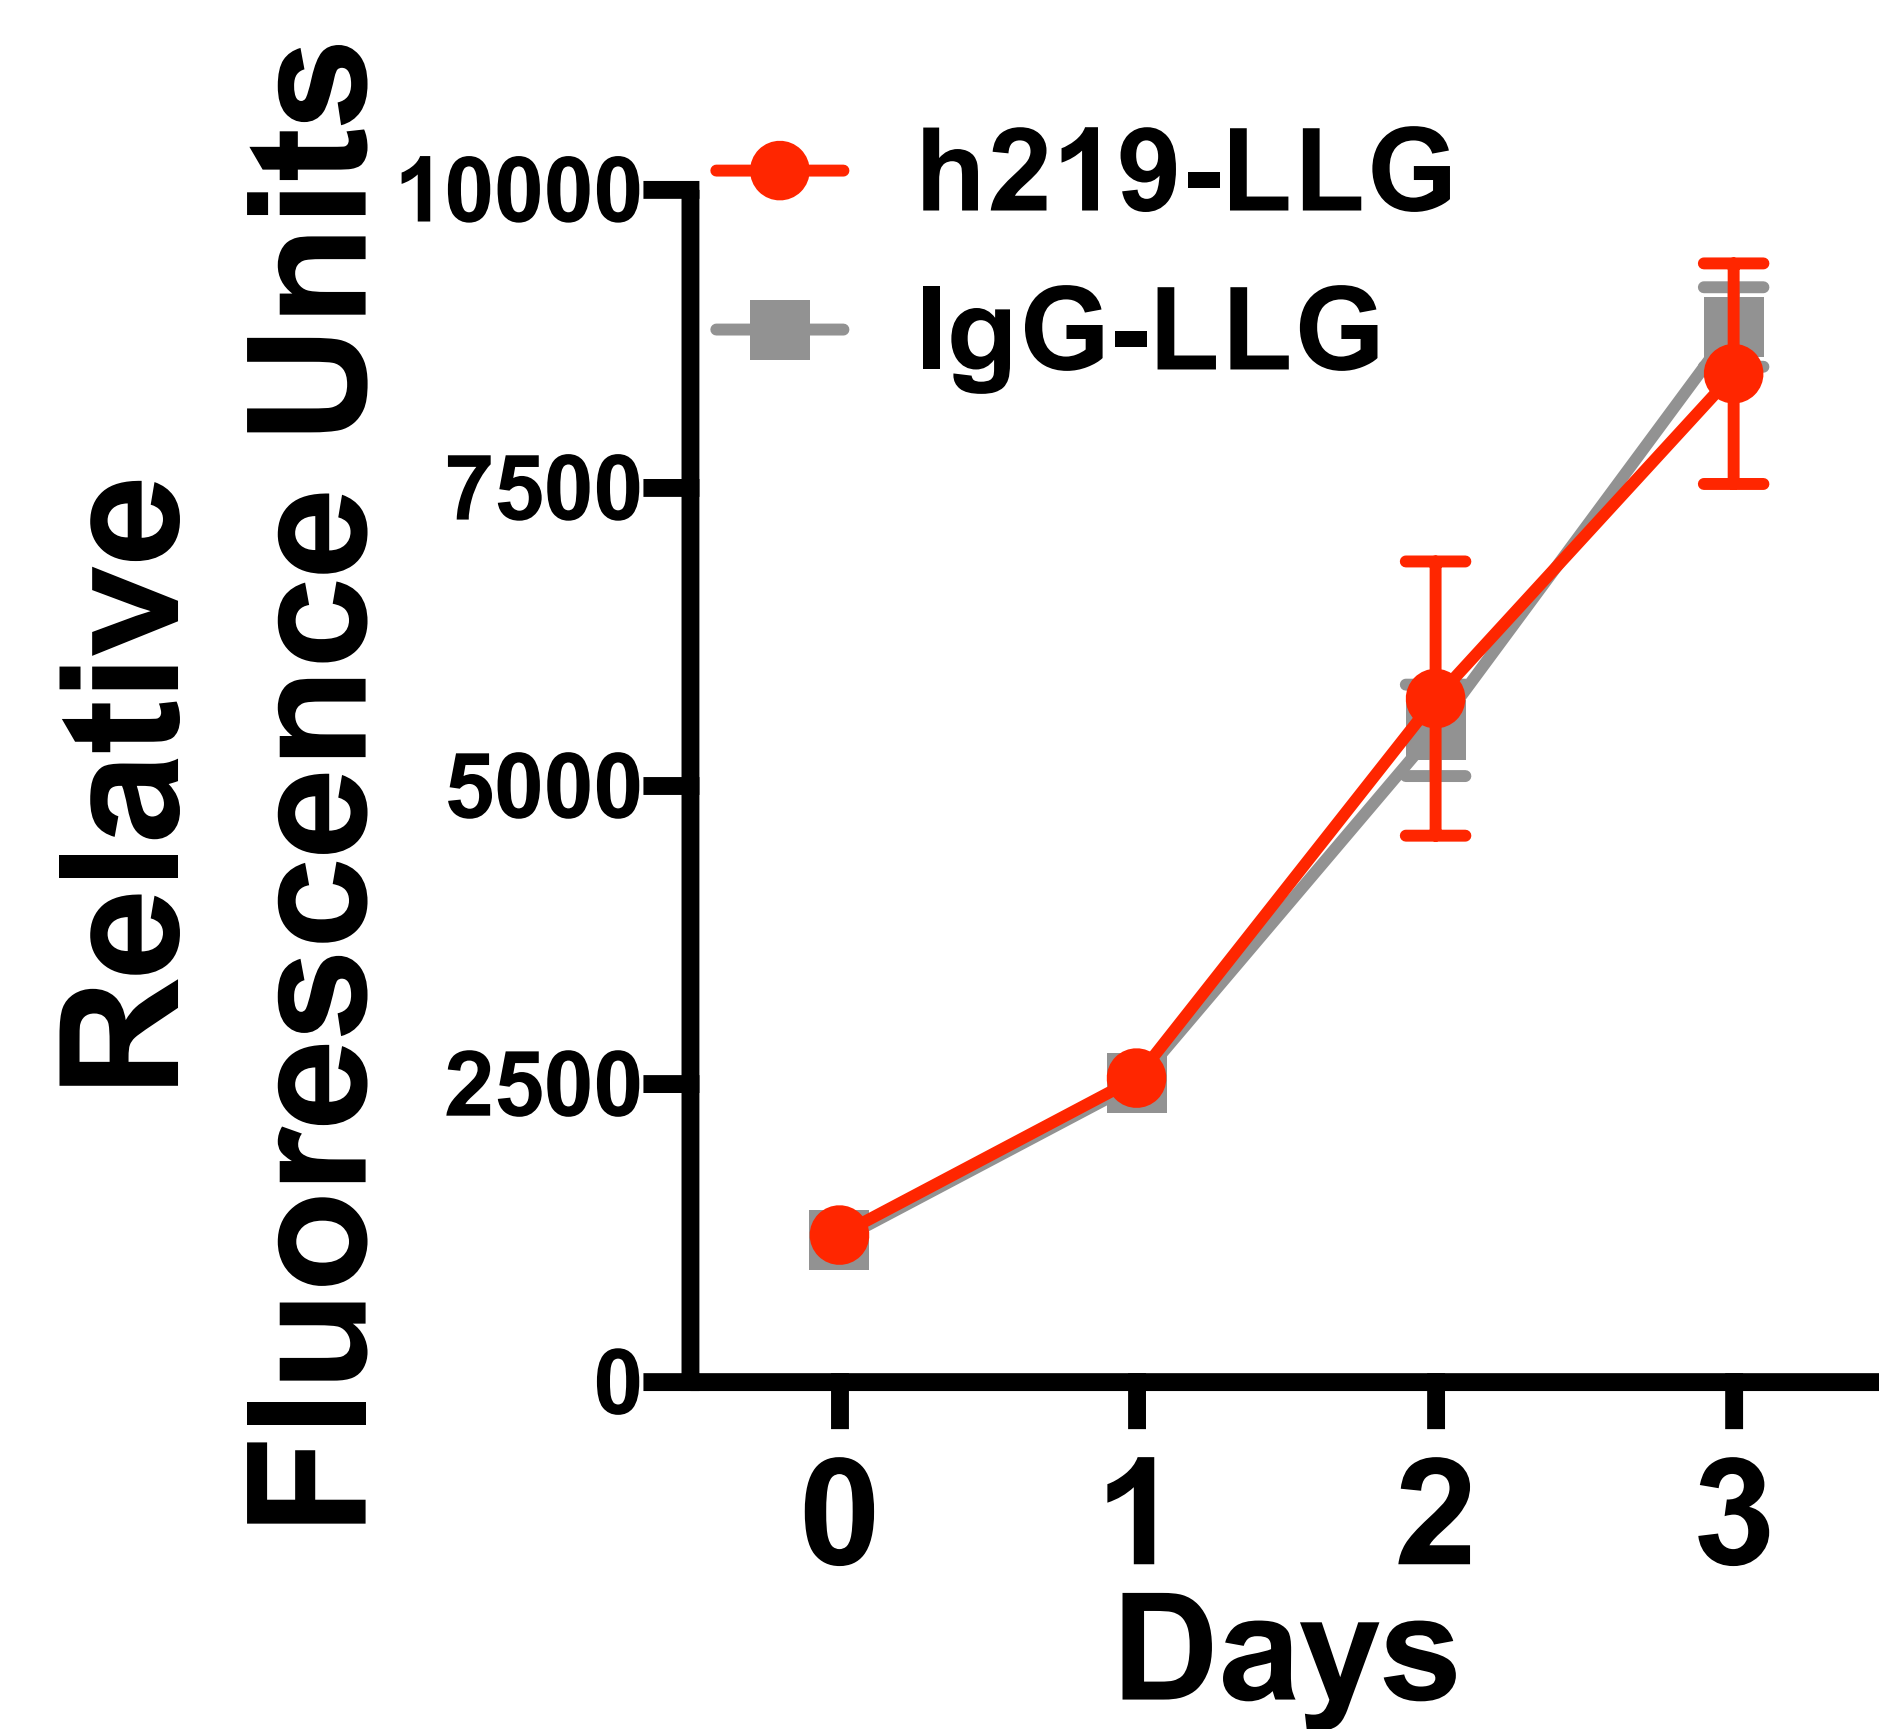**B**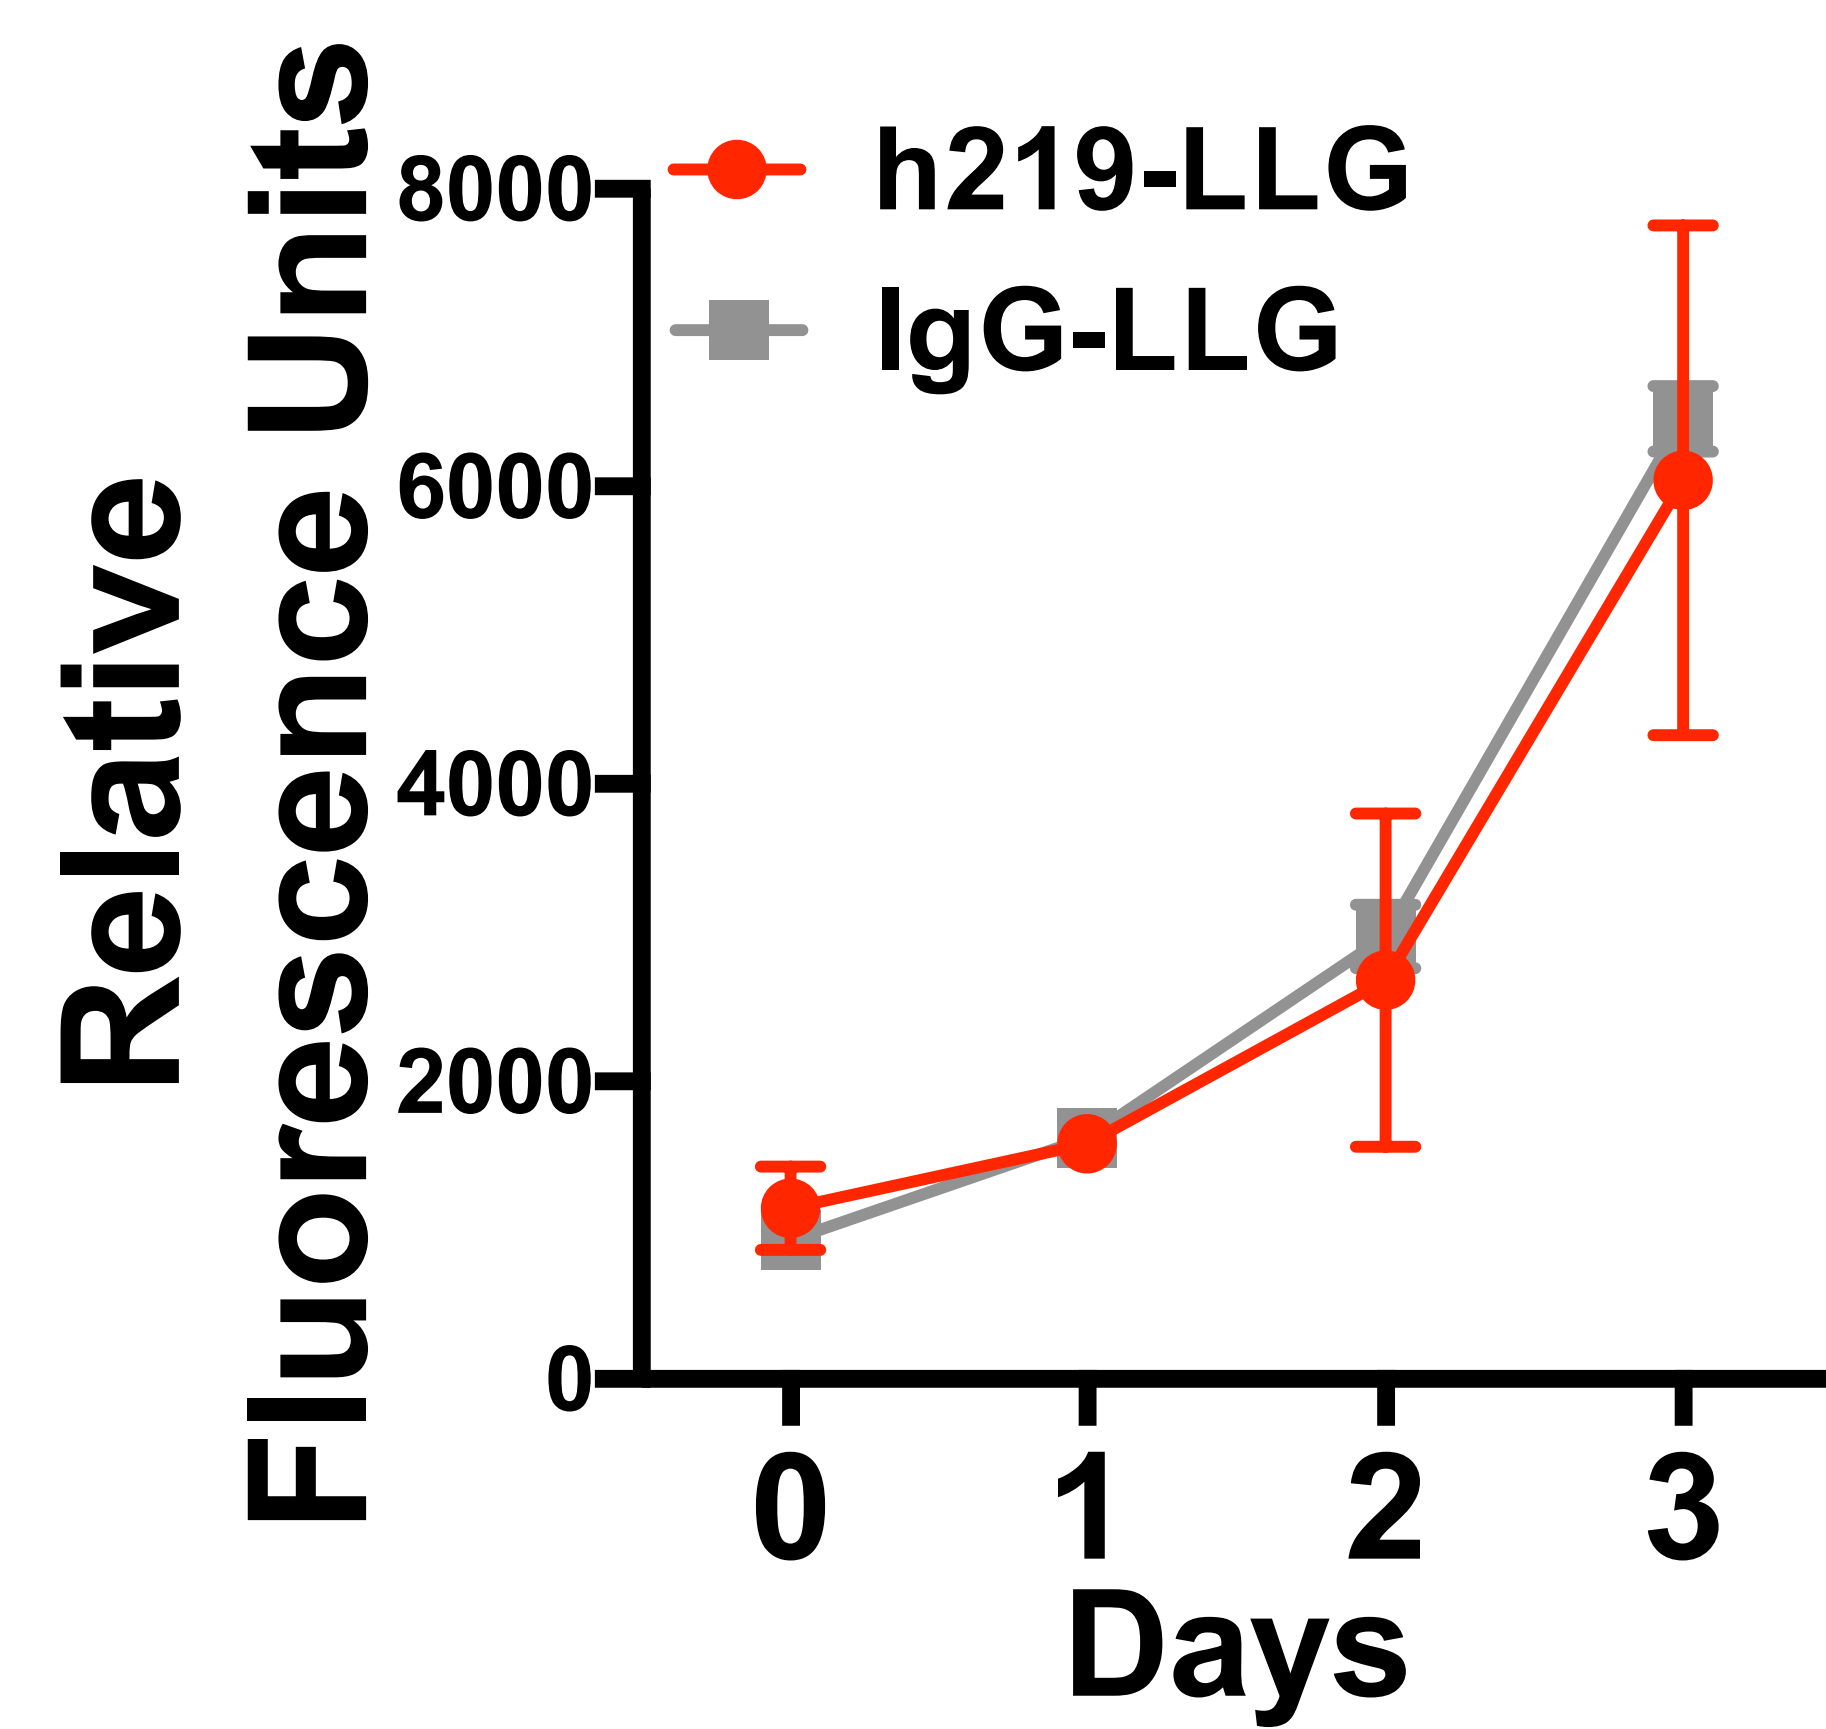**C**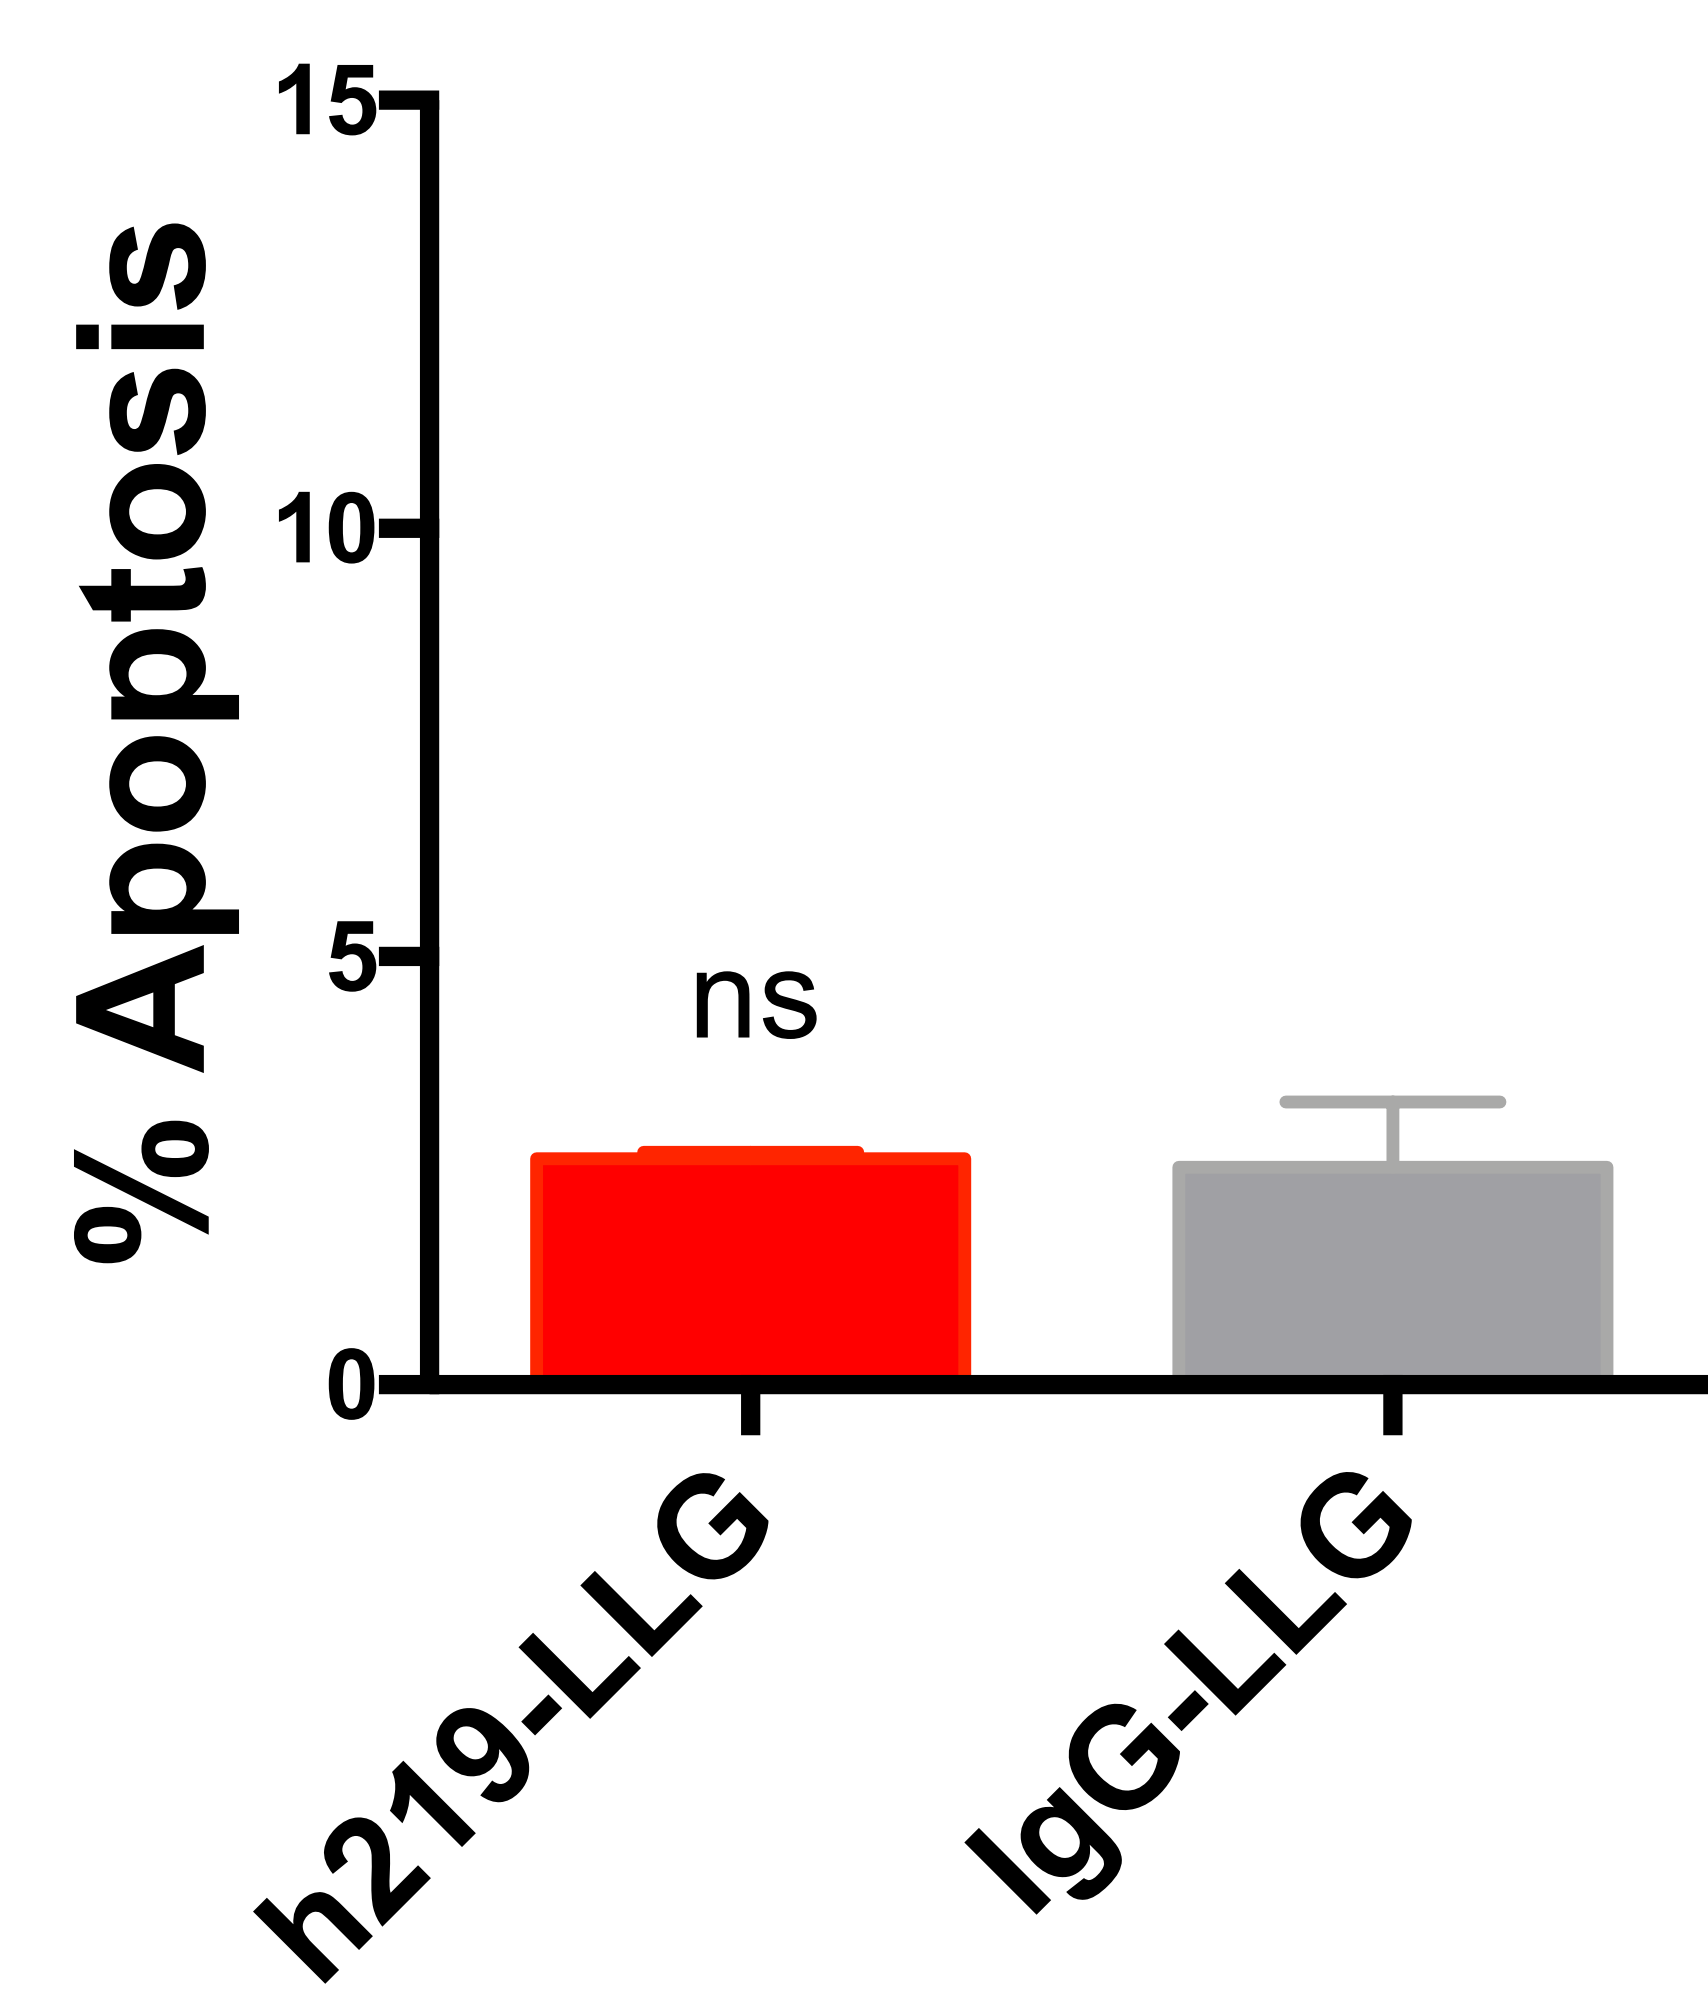**D**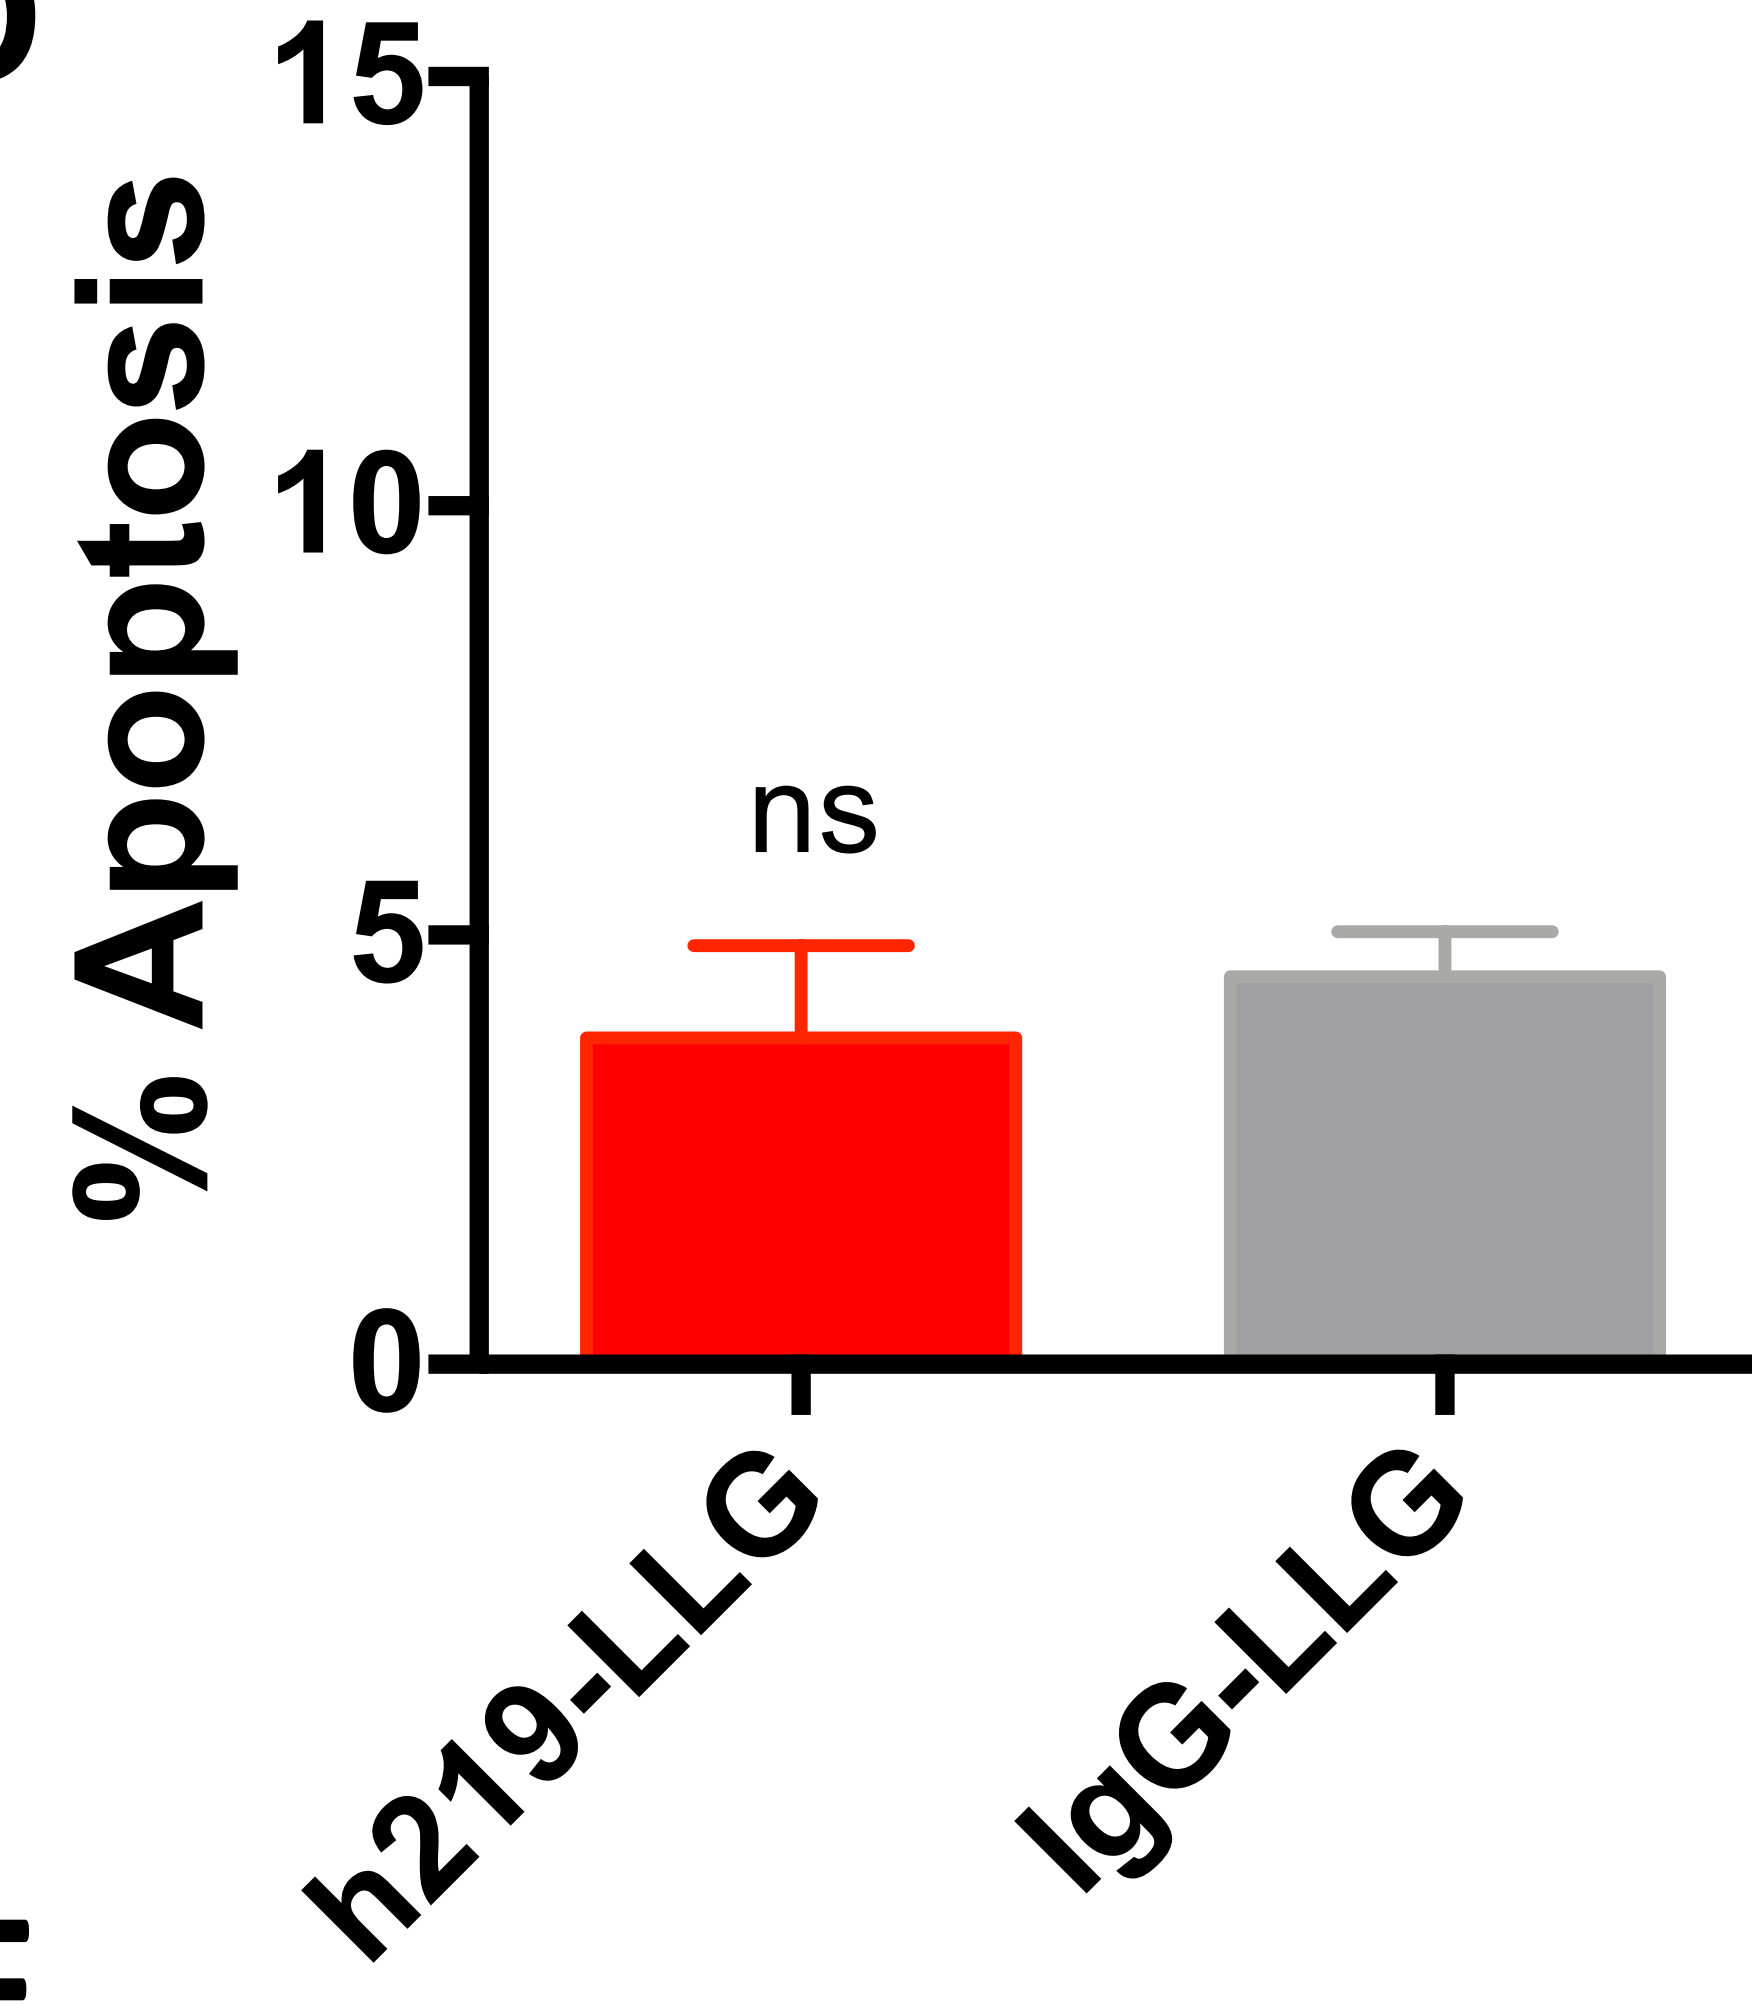**E**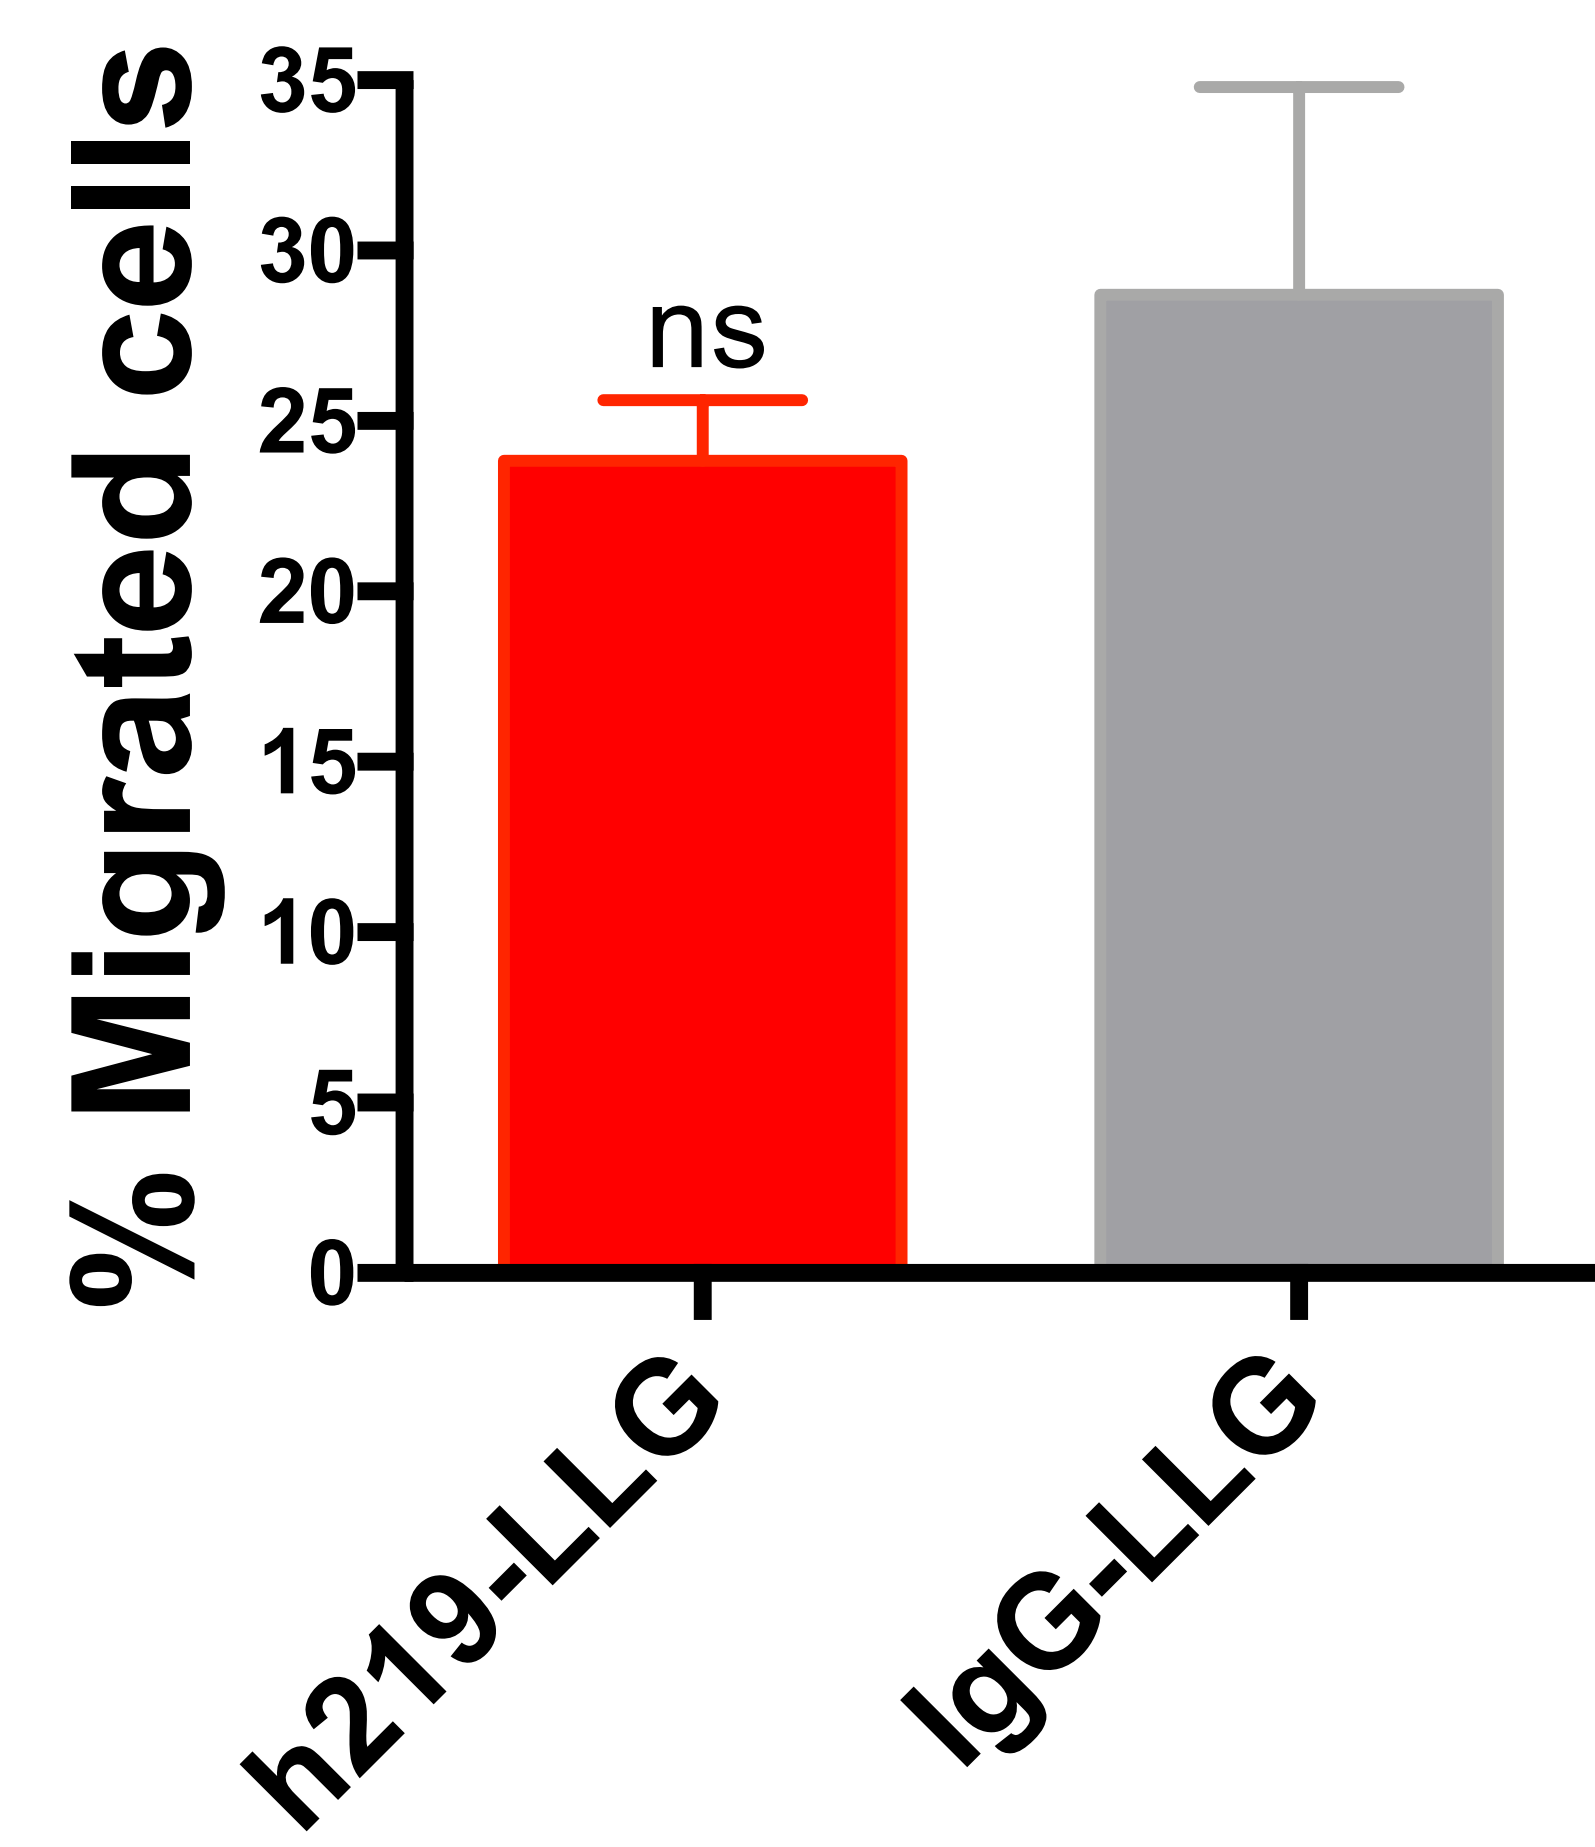**F**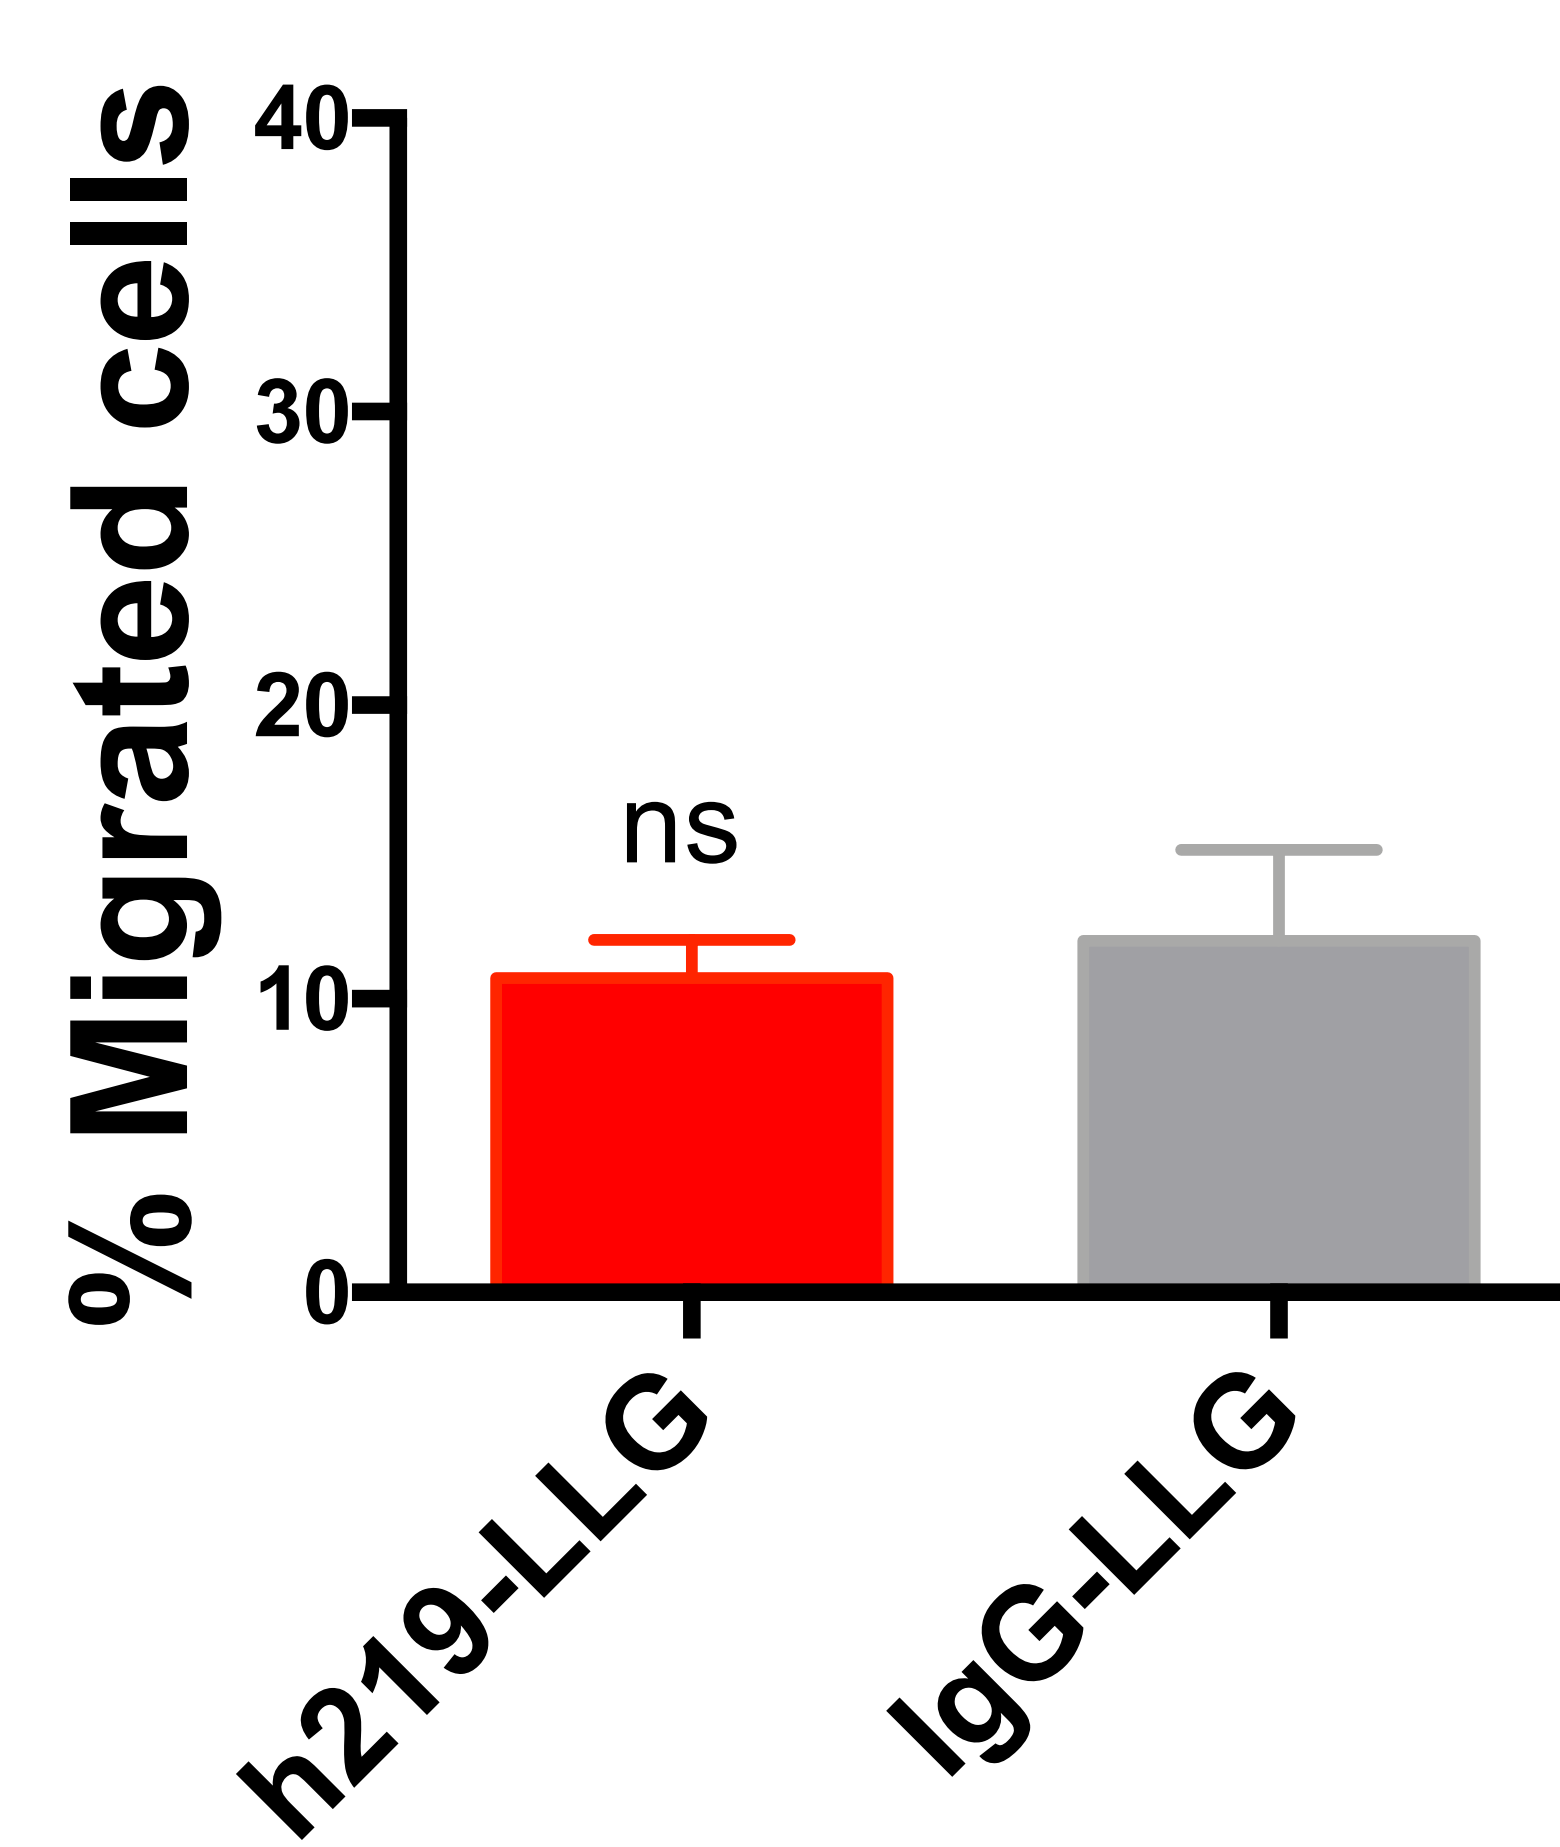

Supplementary Fig 7

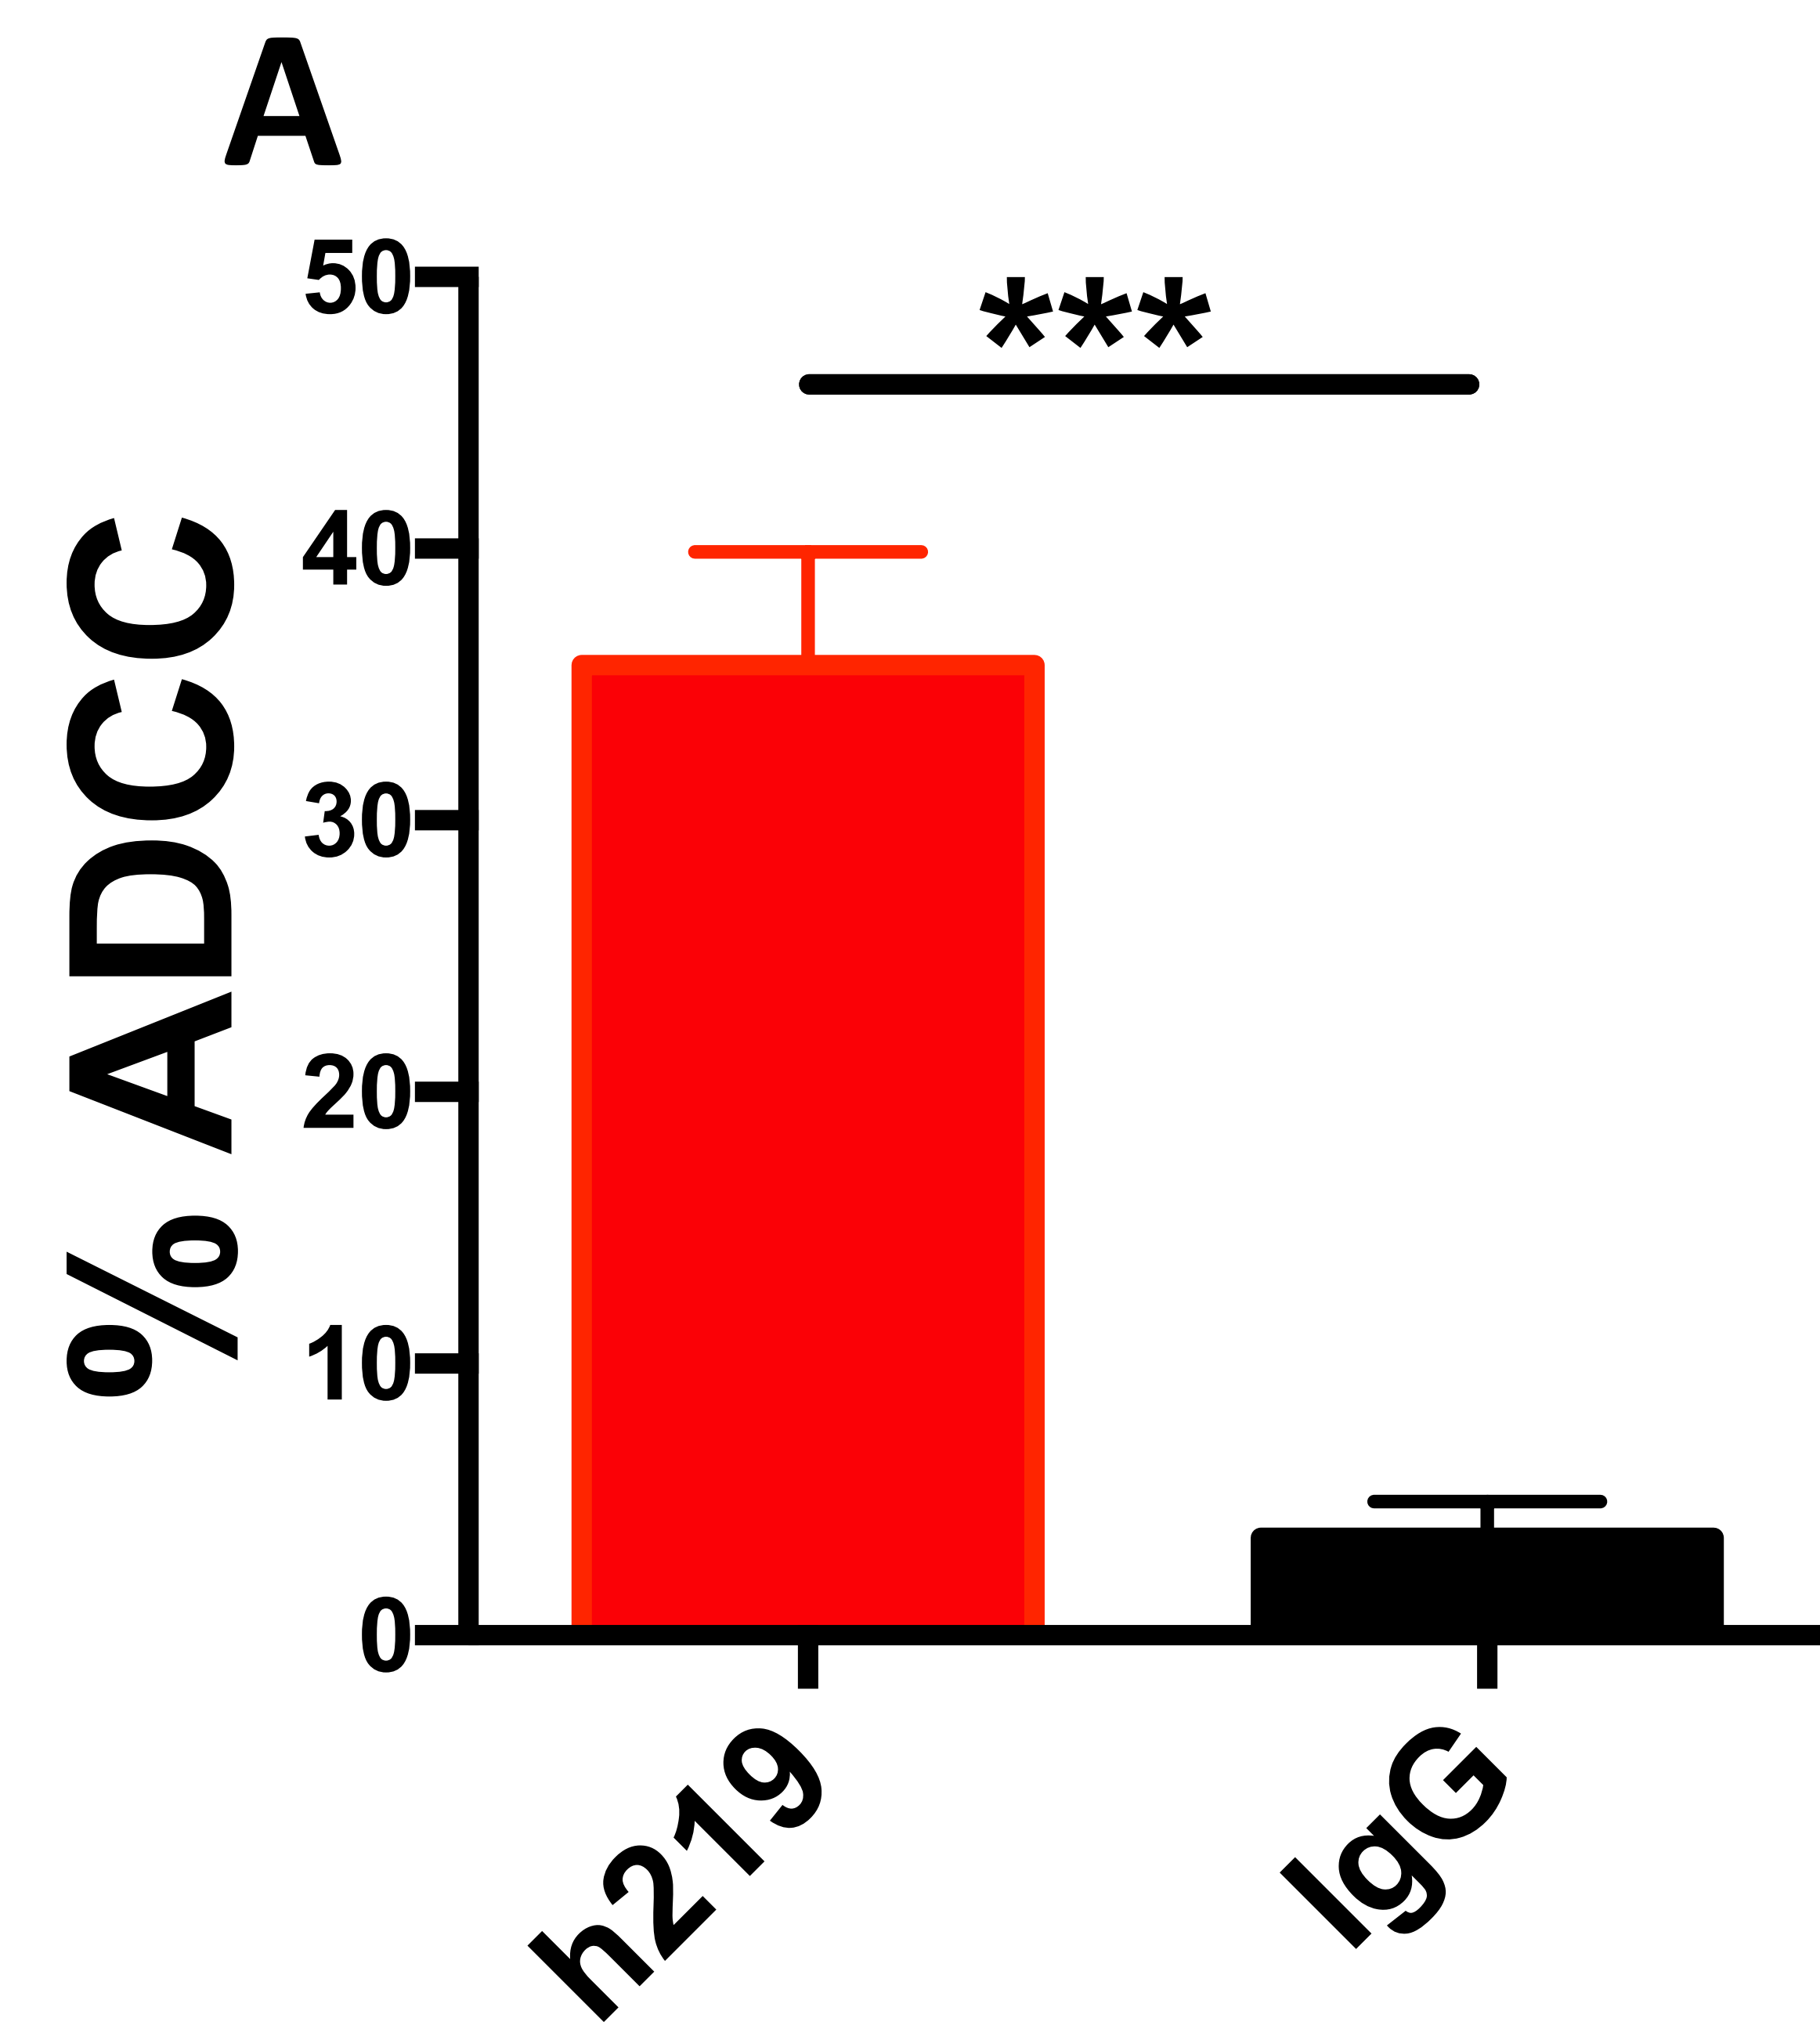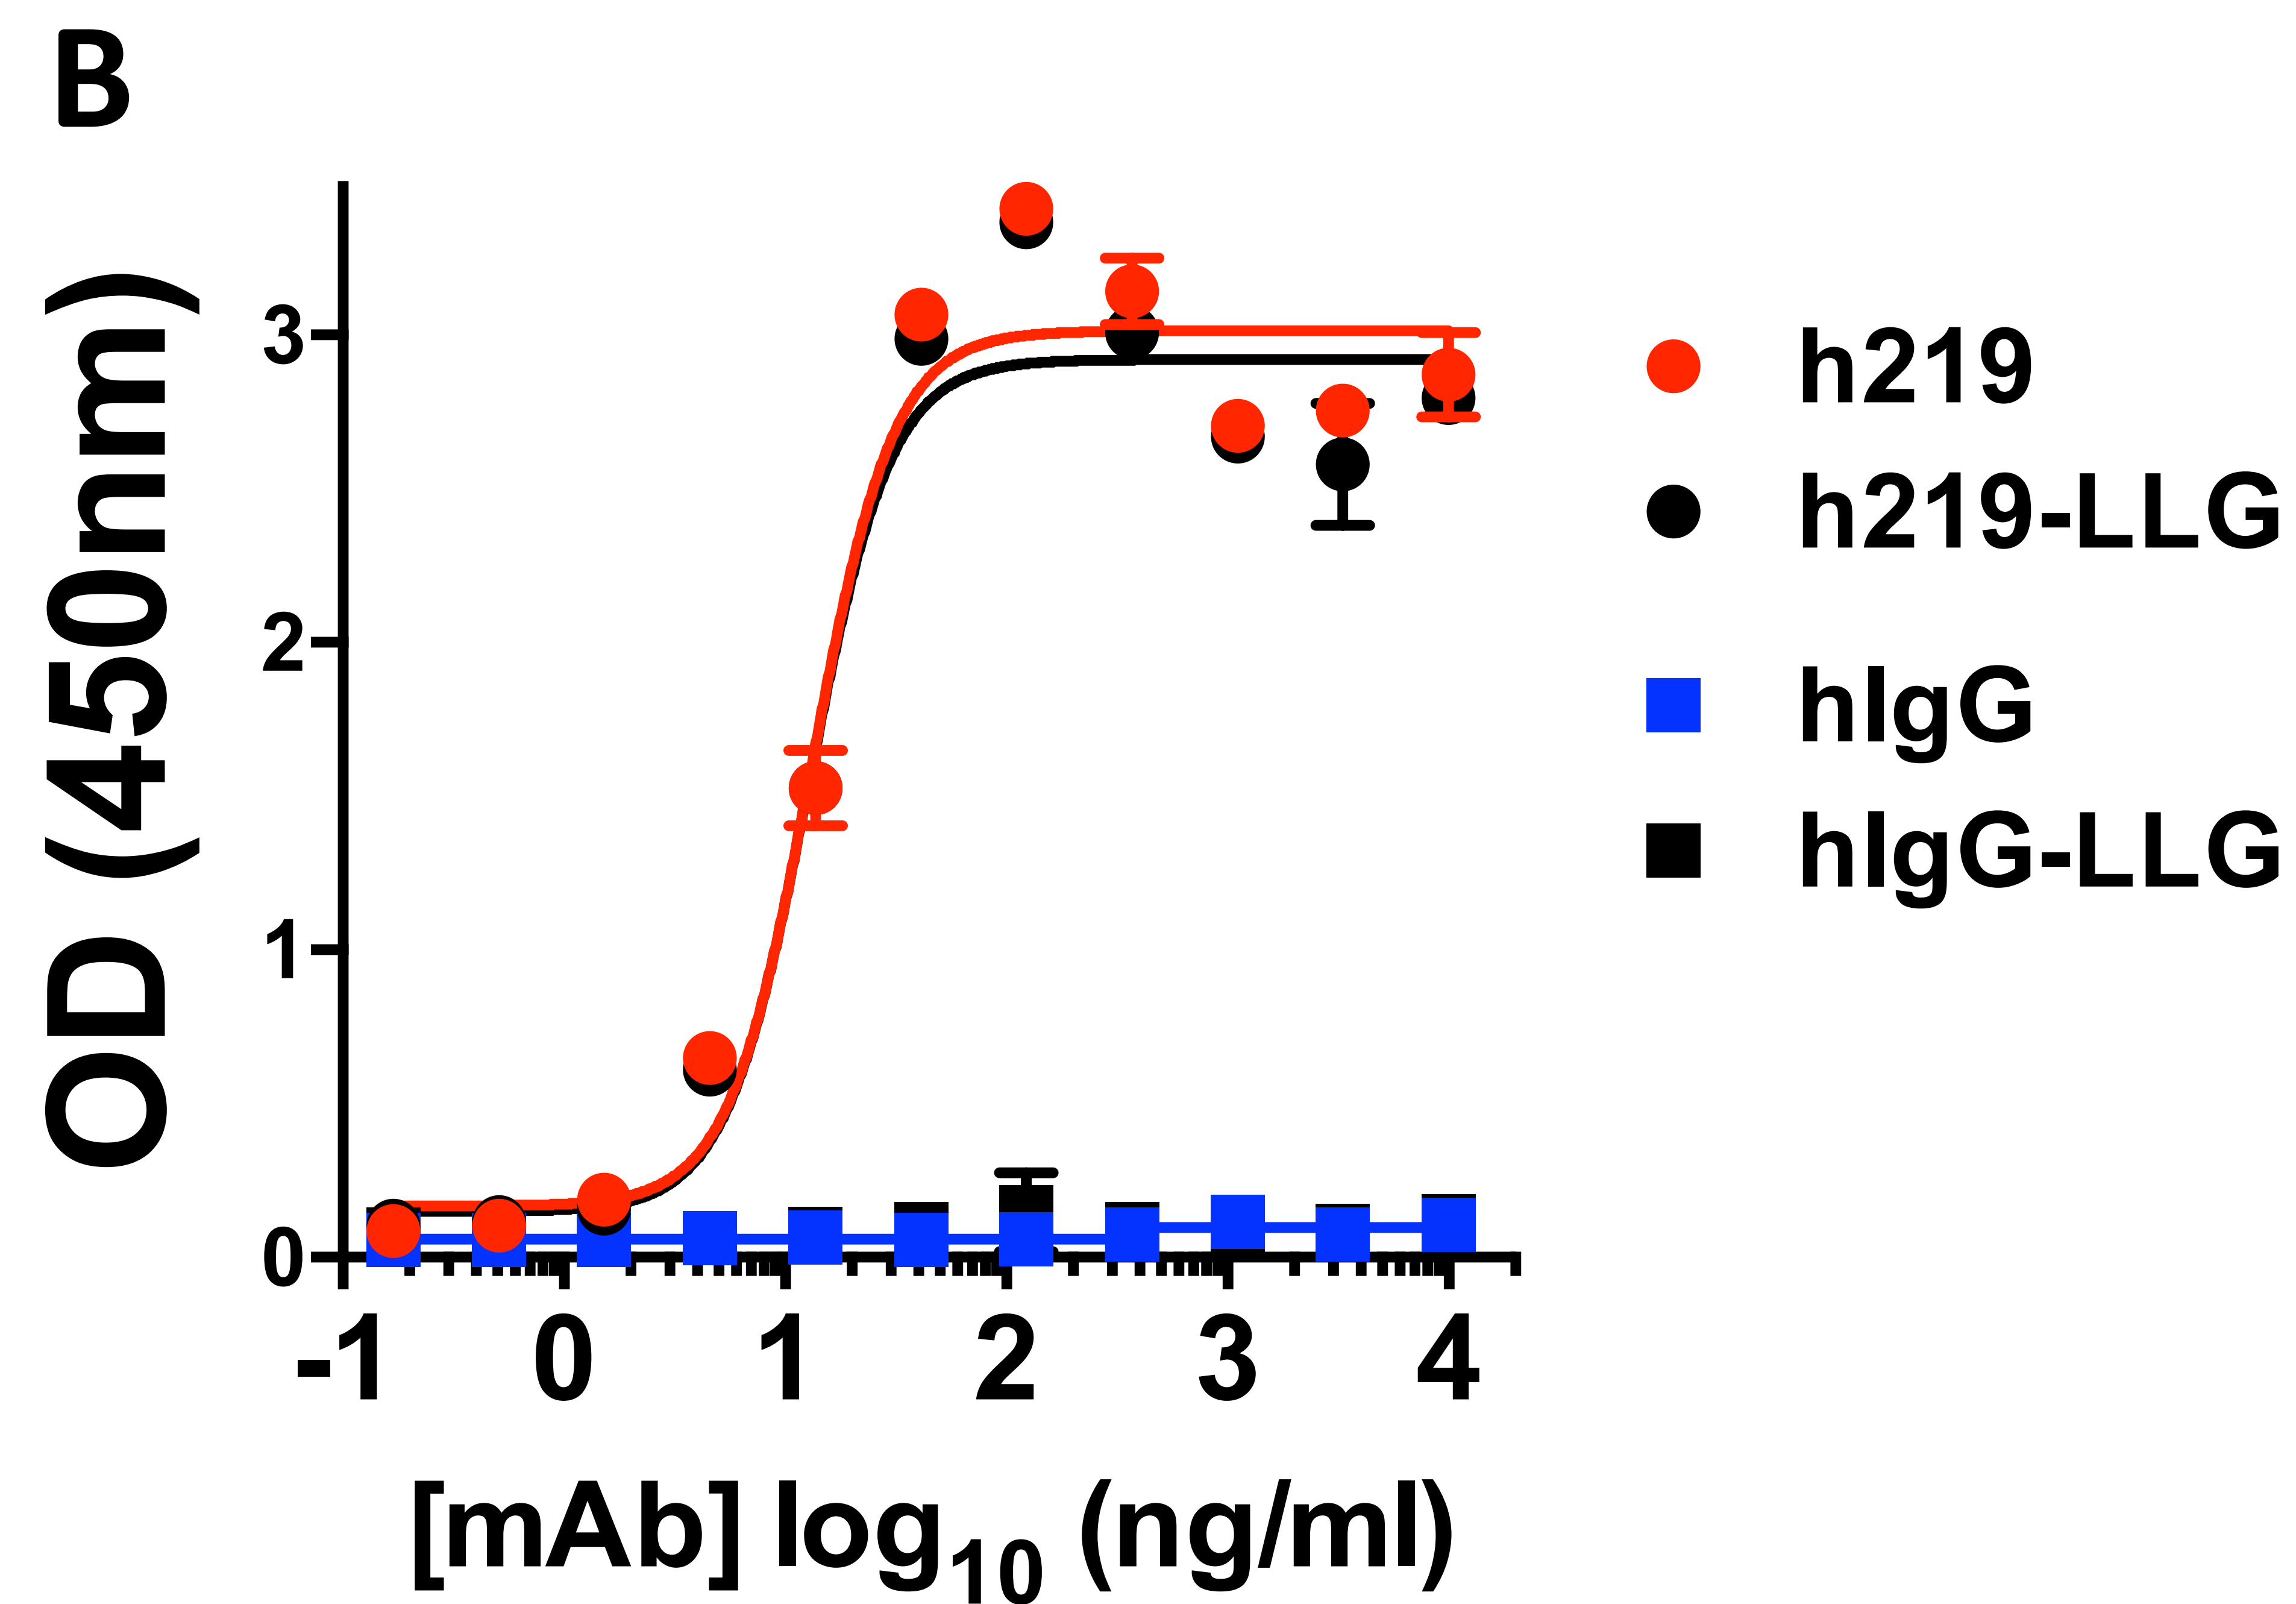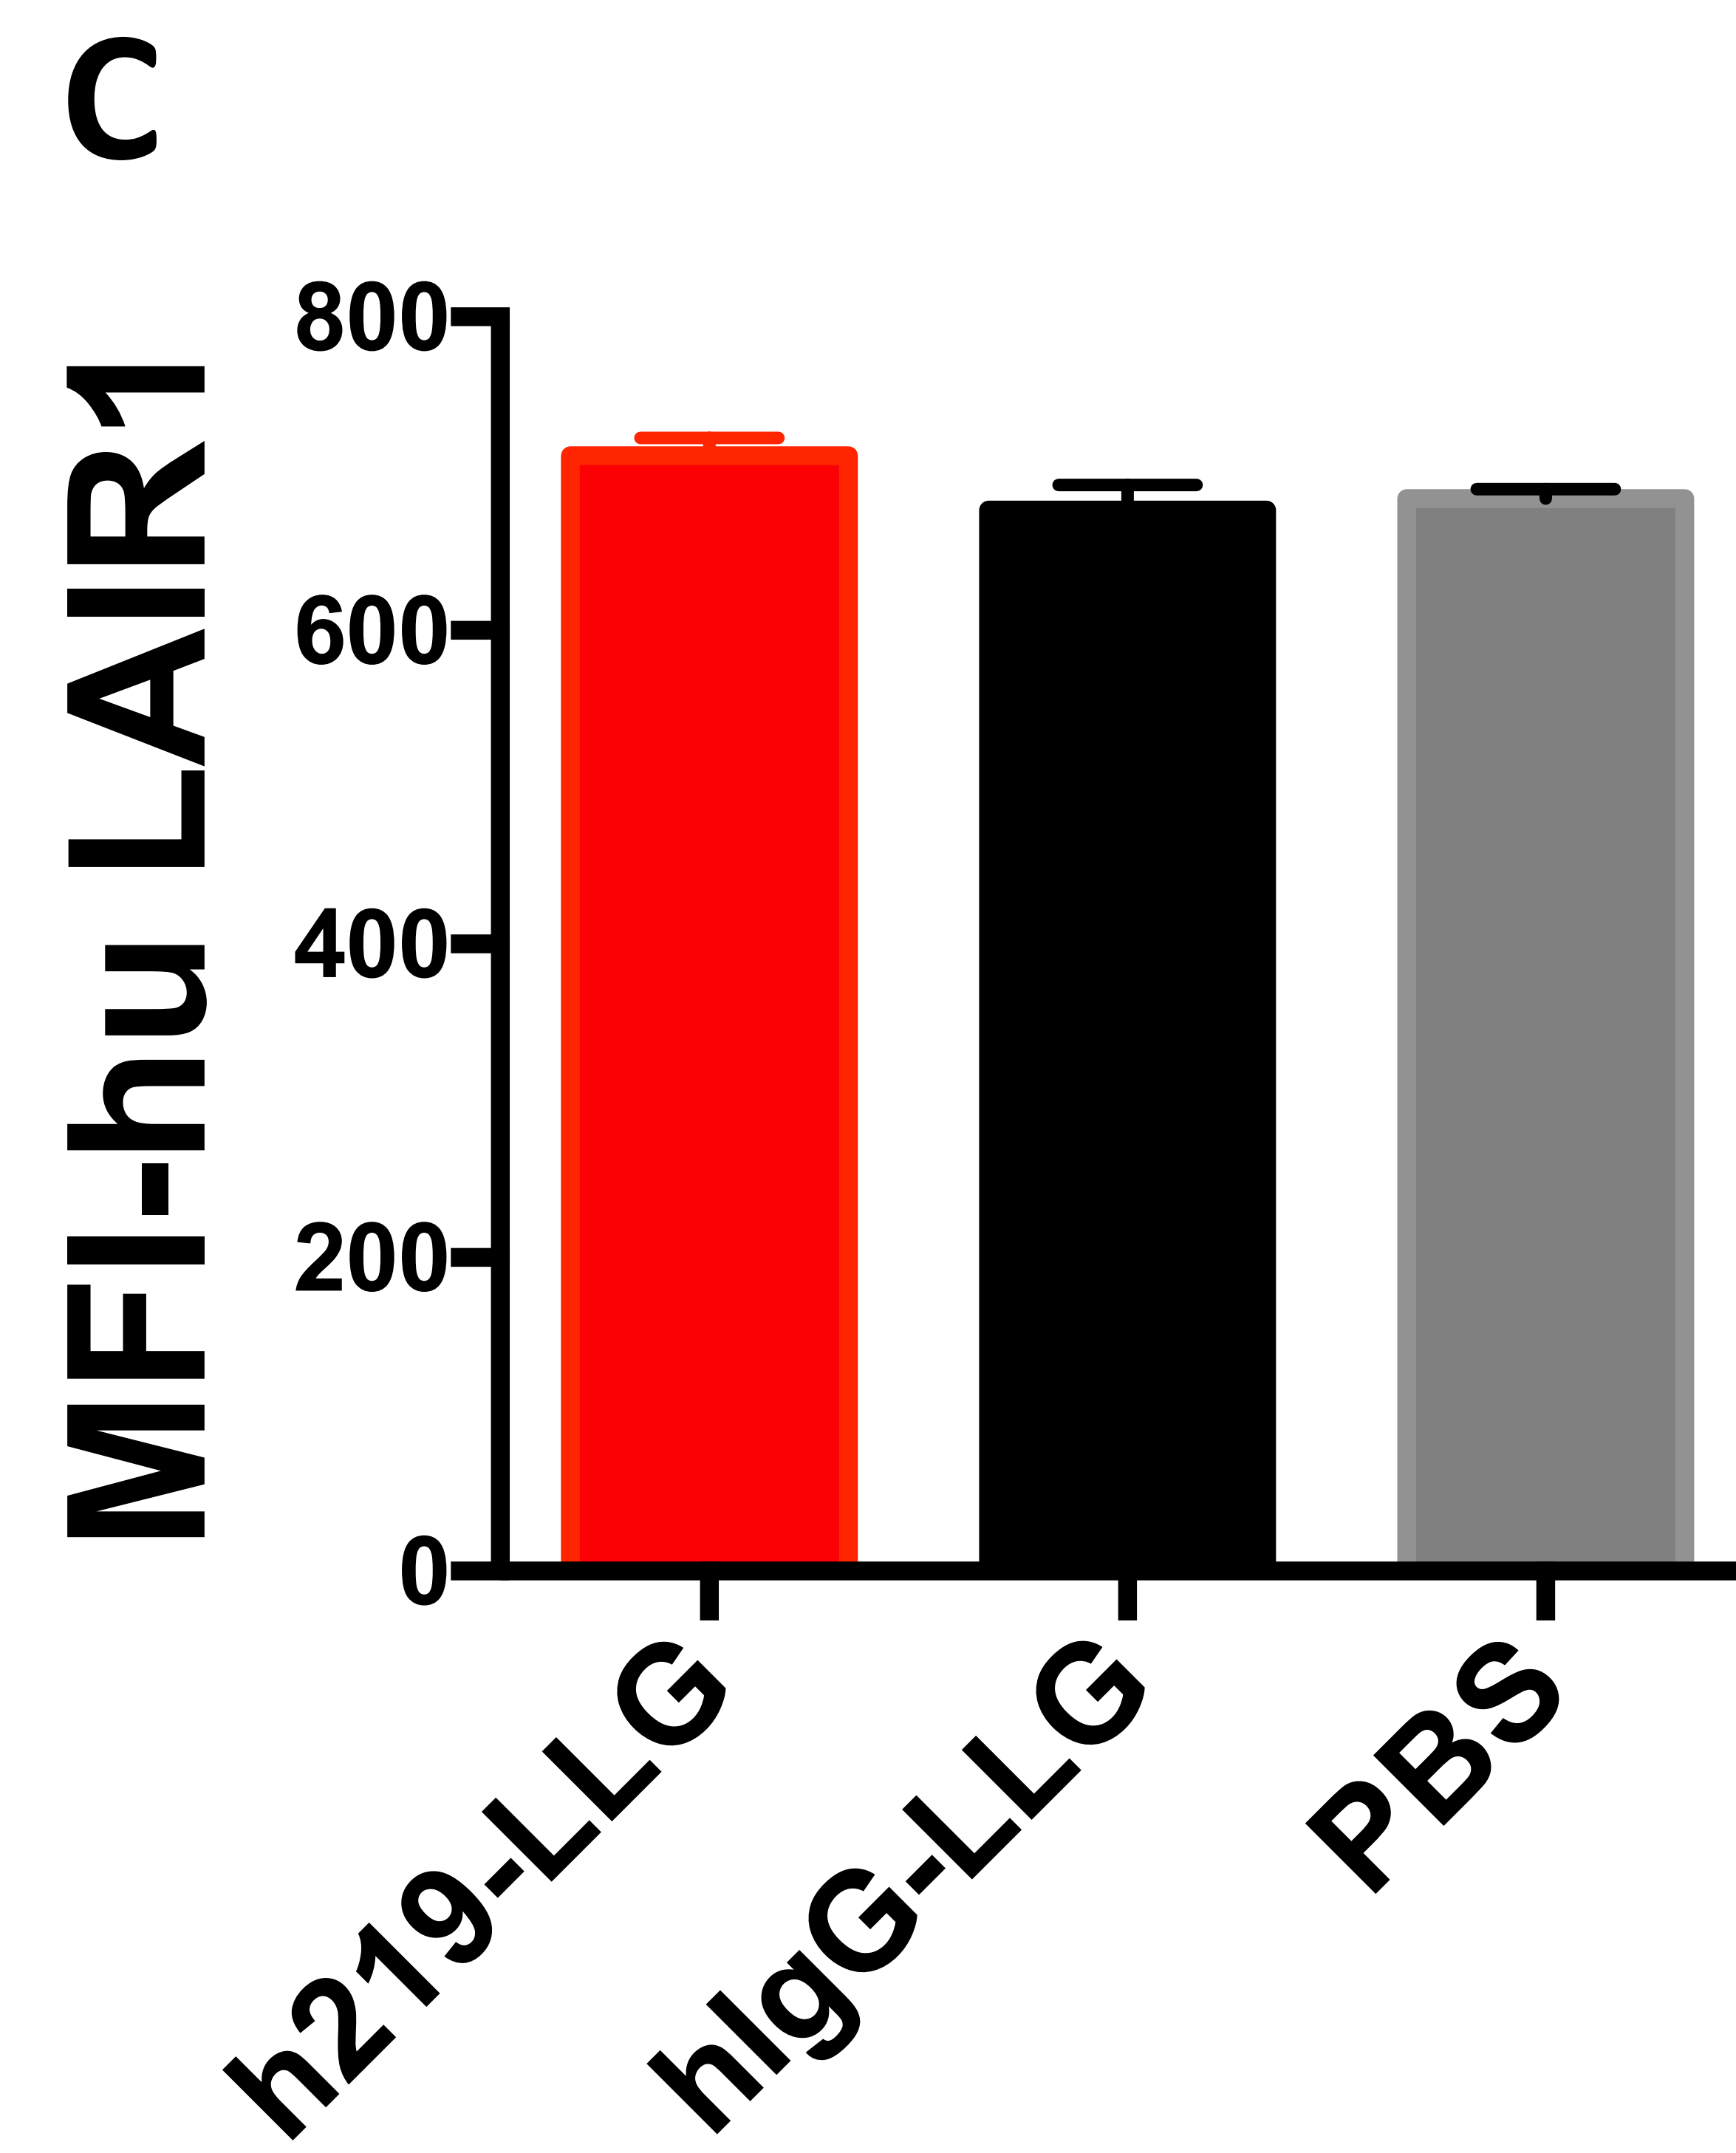

Supplementary Fig 8

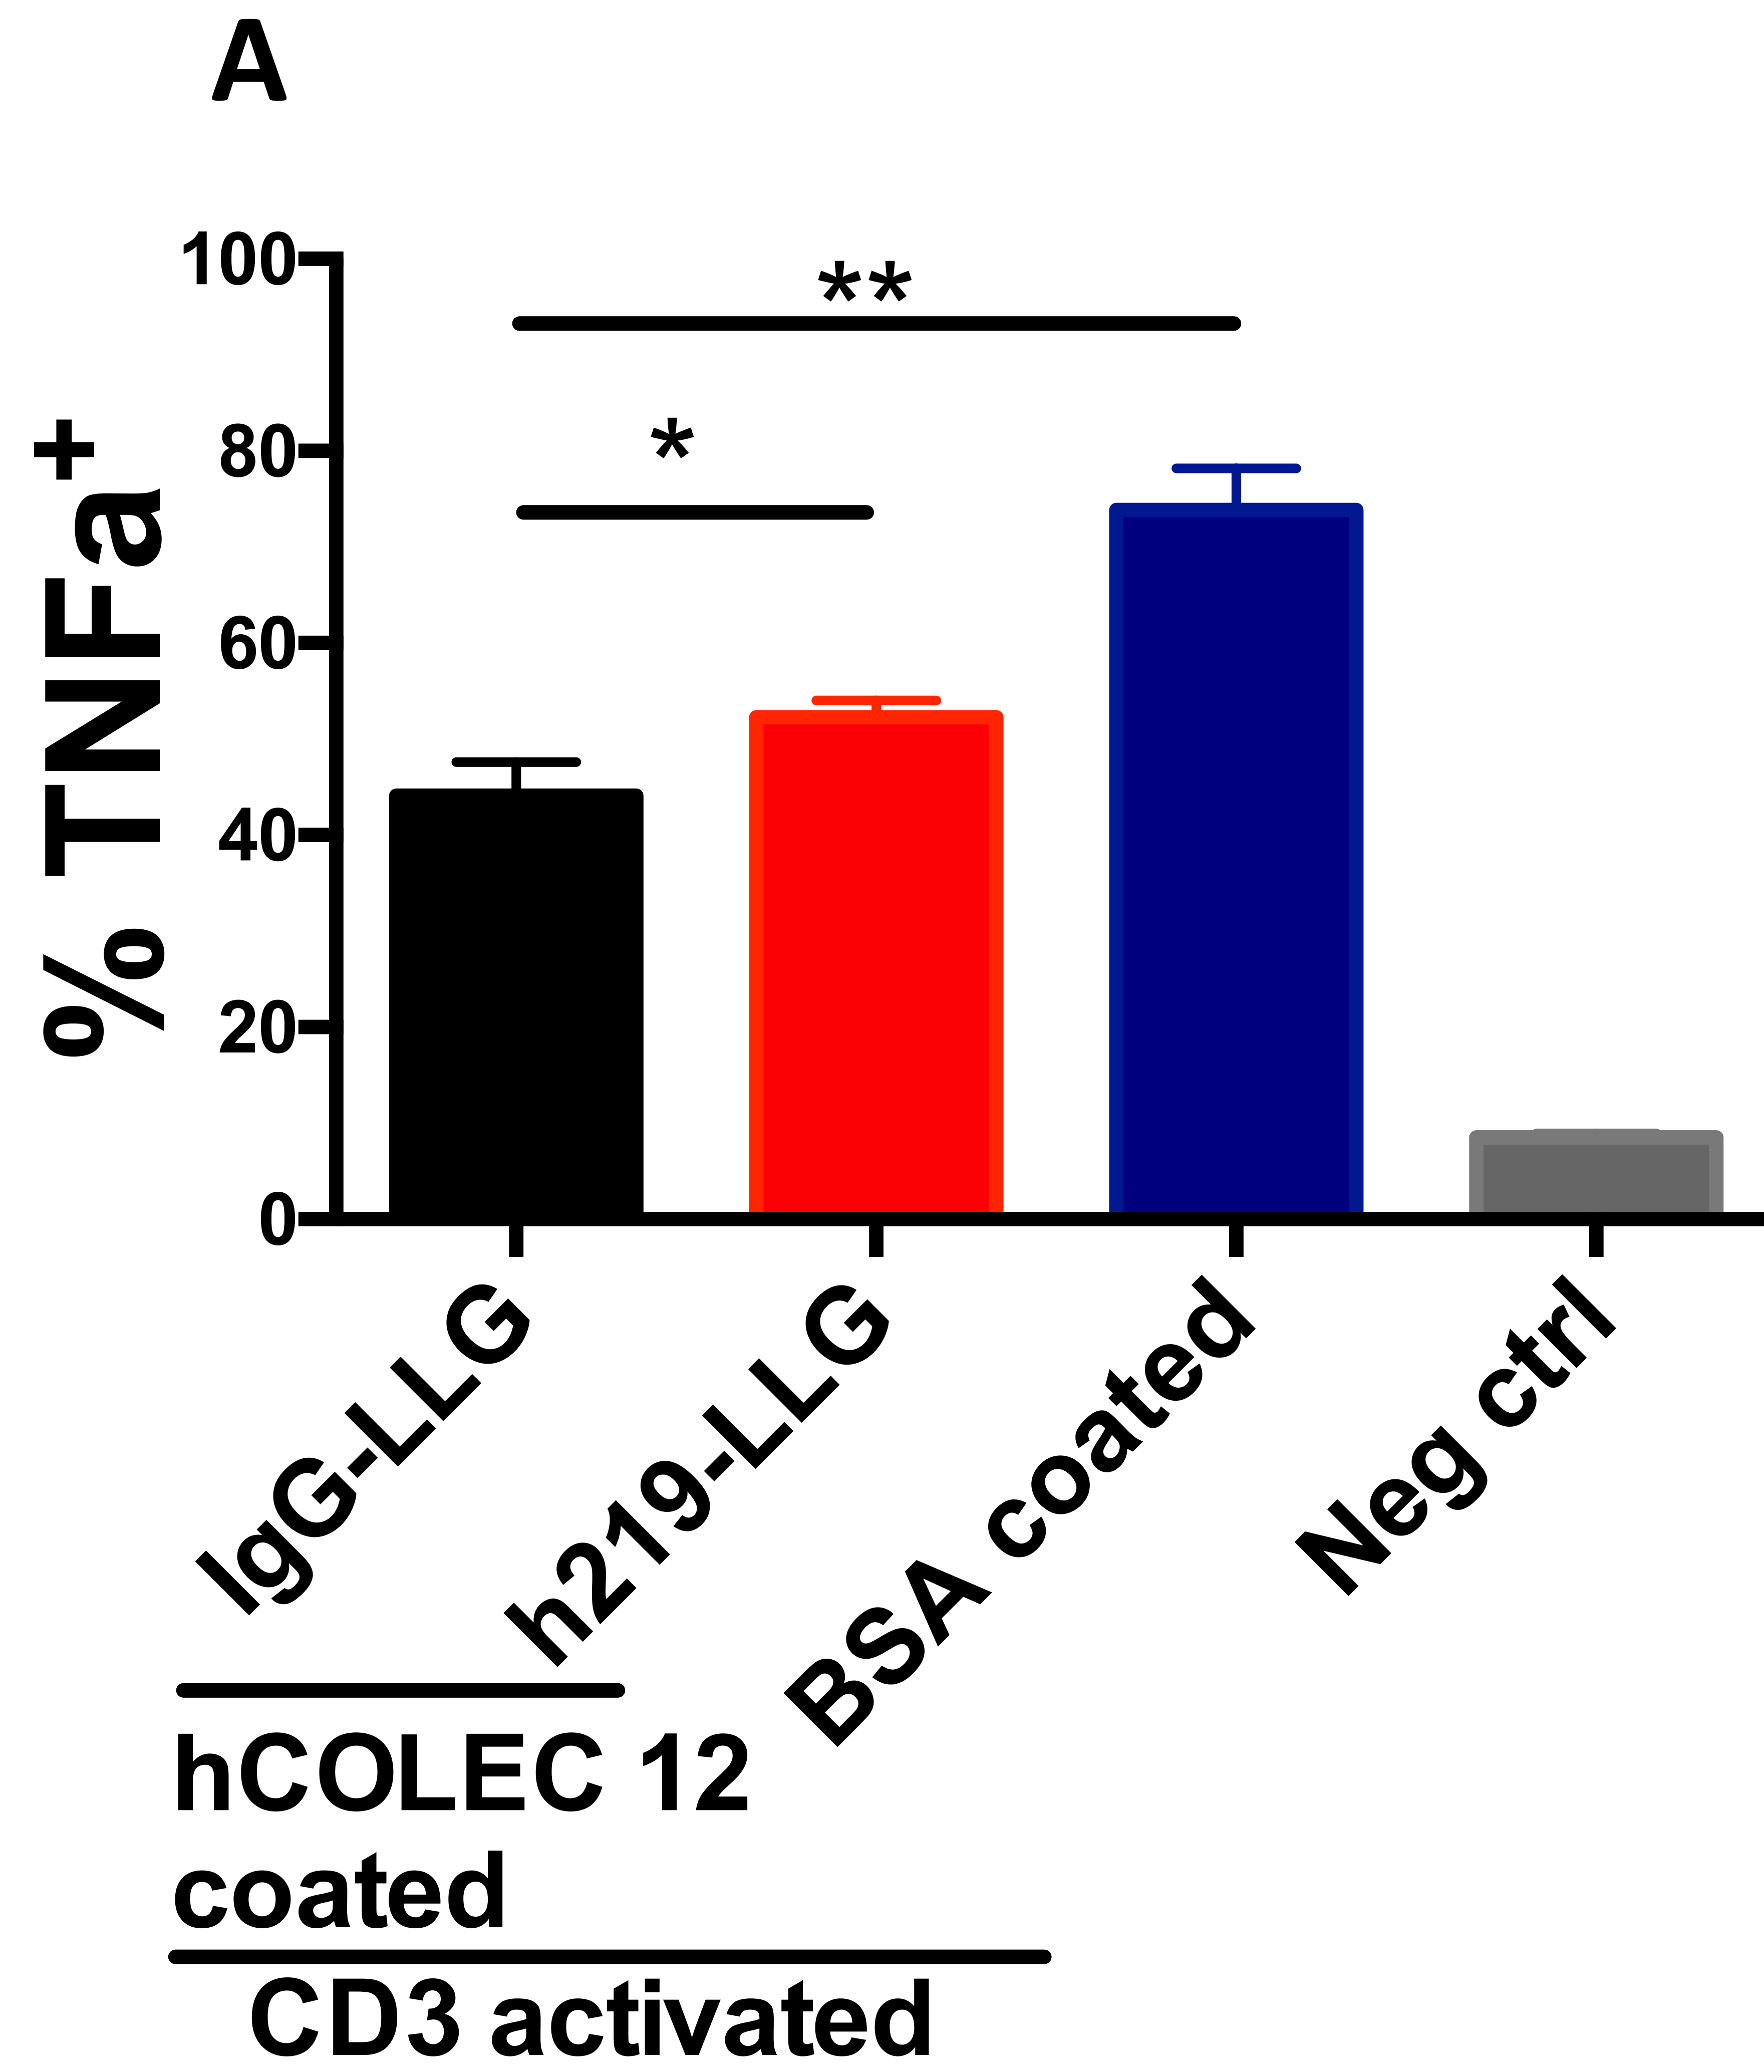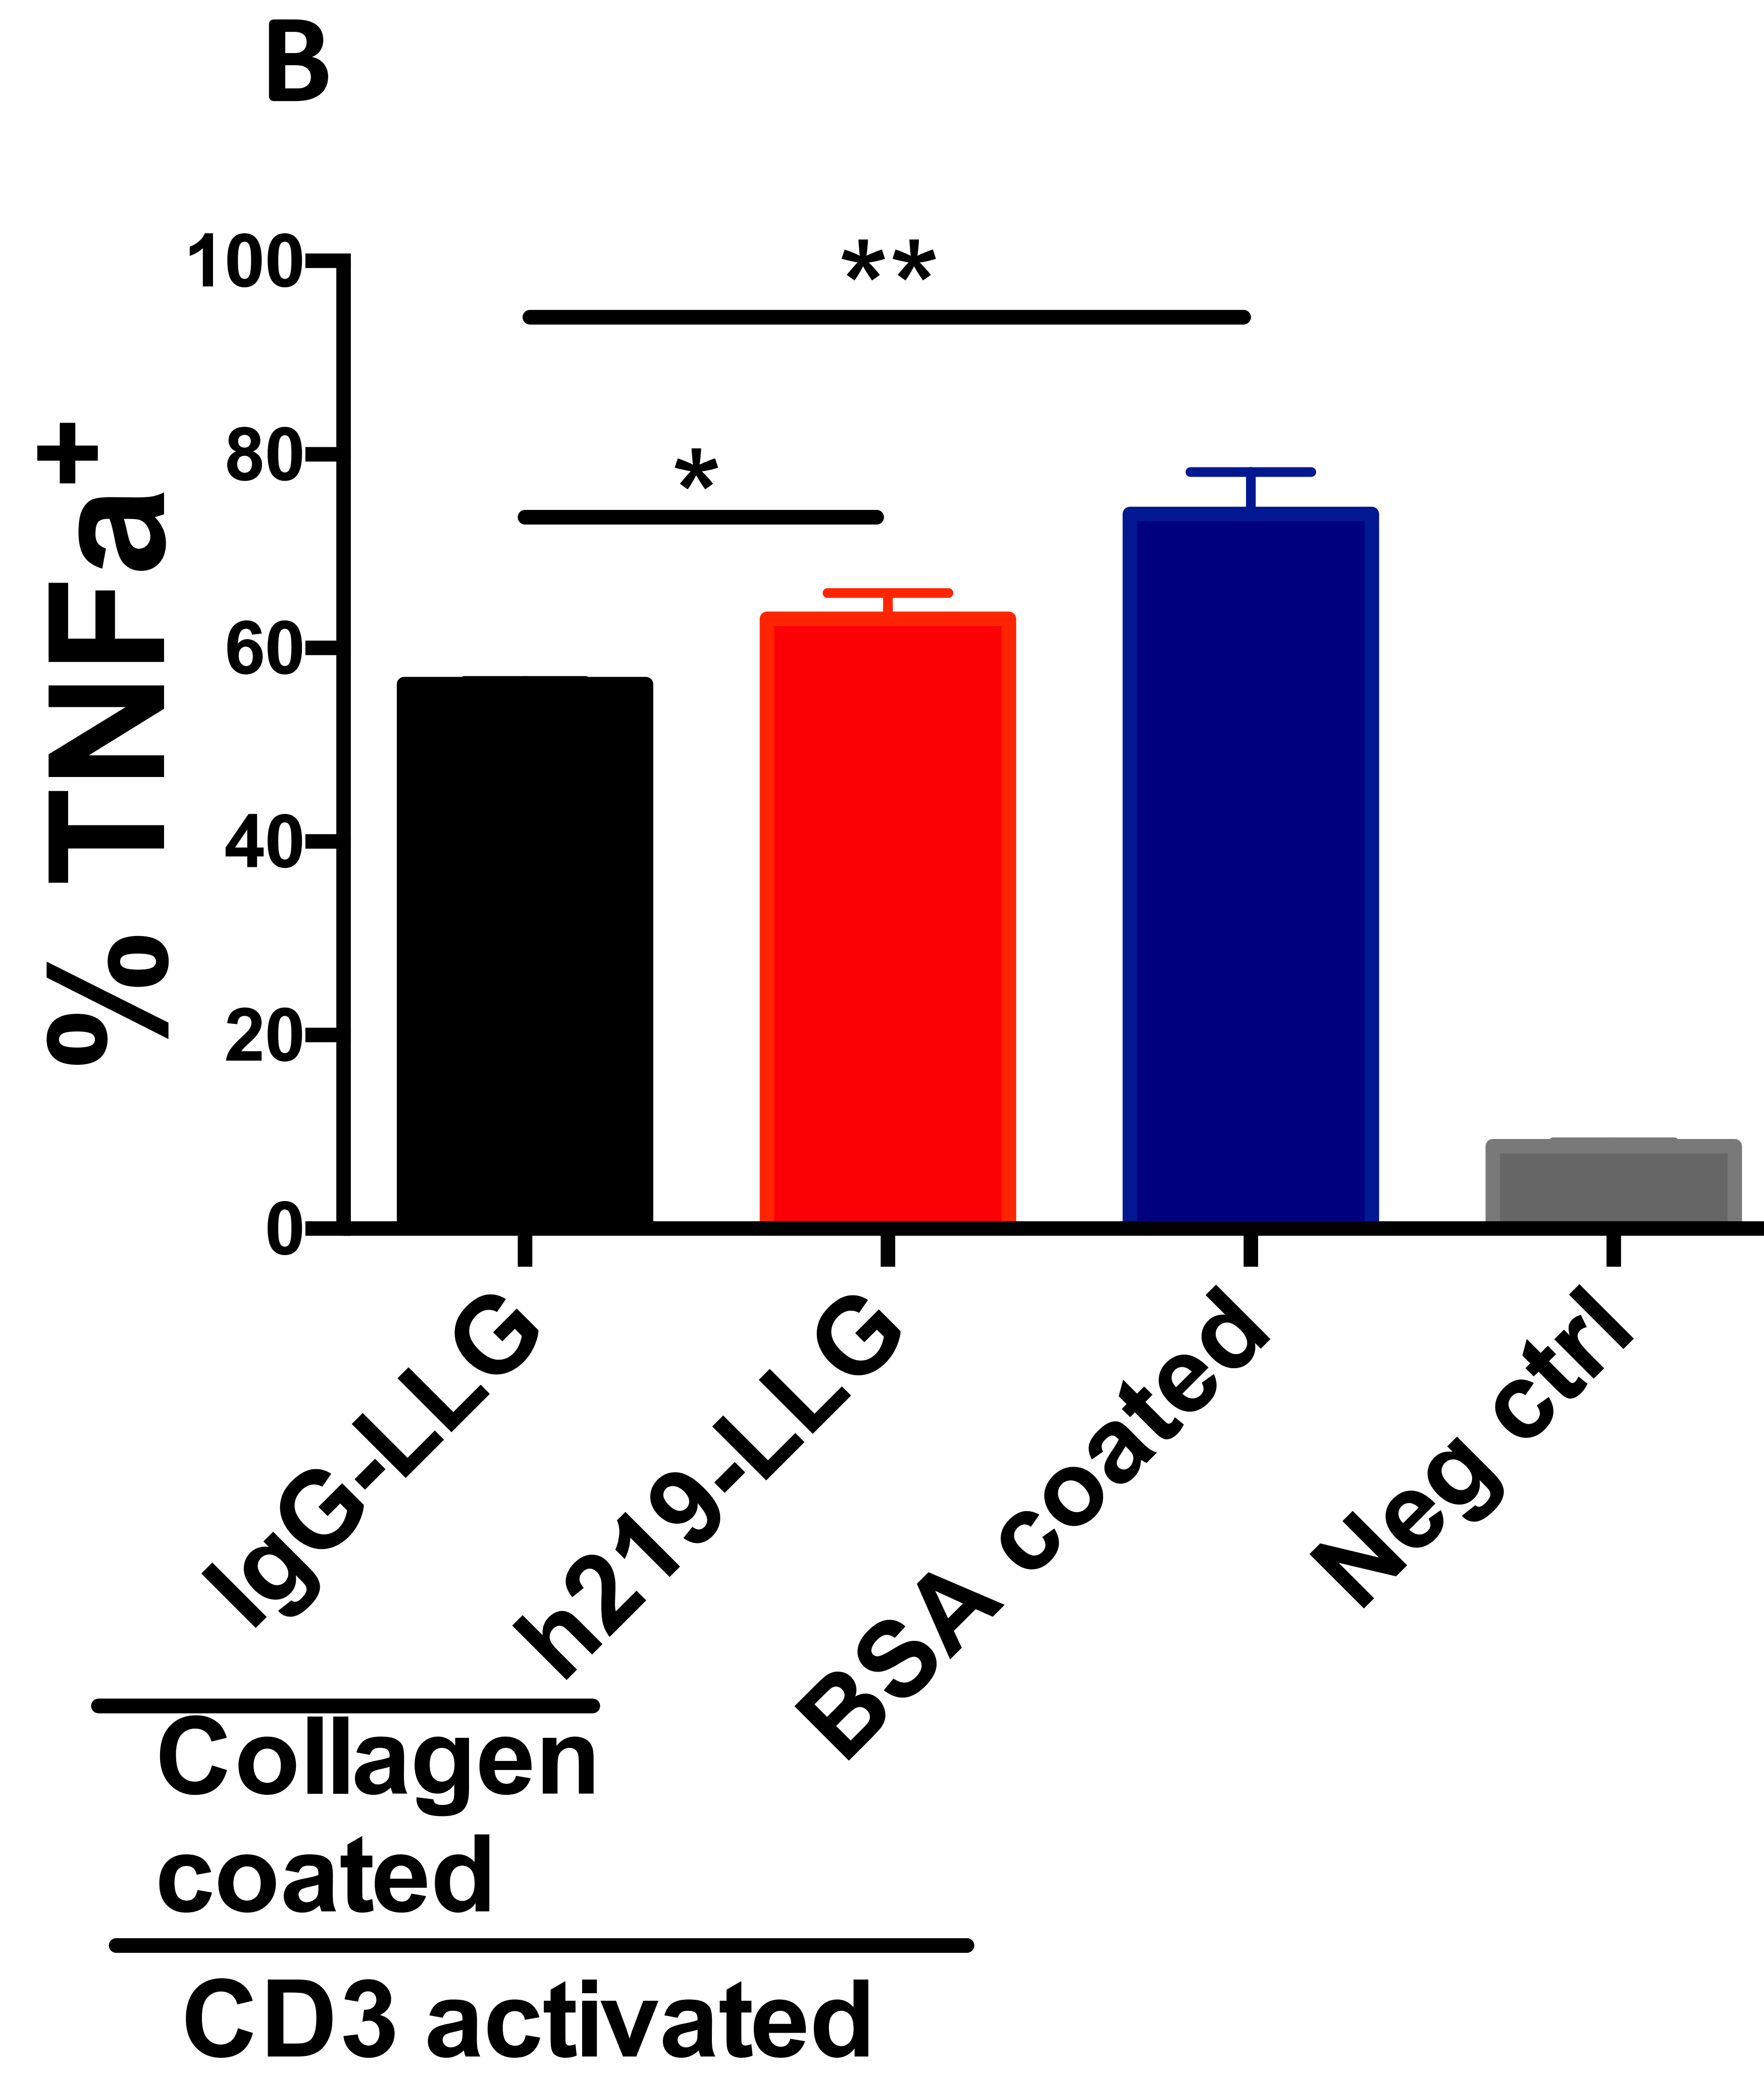



# Supplementary Fig 9

**A**

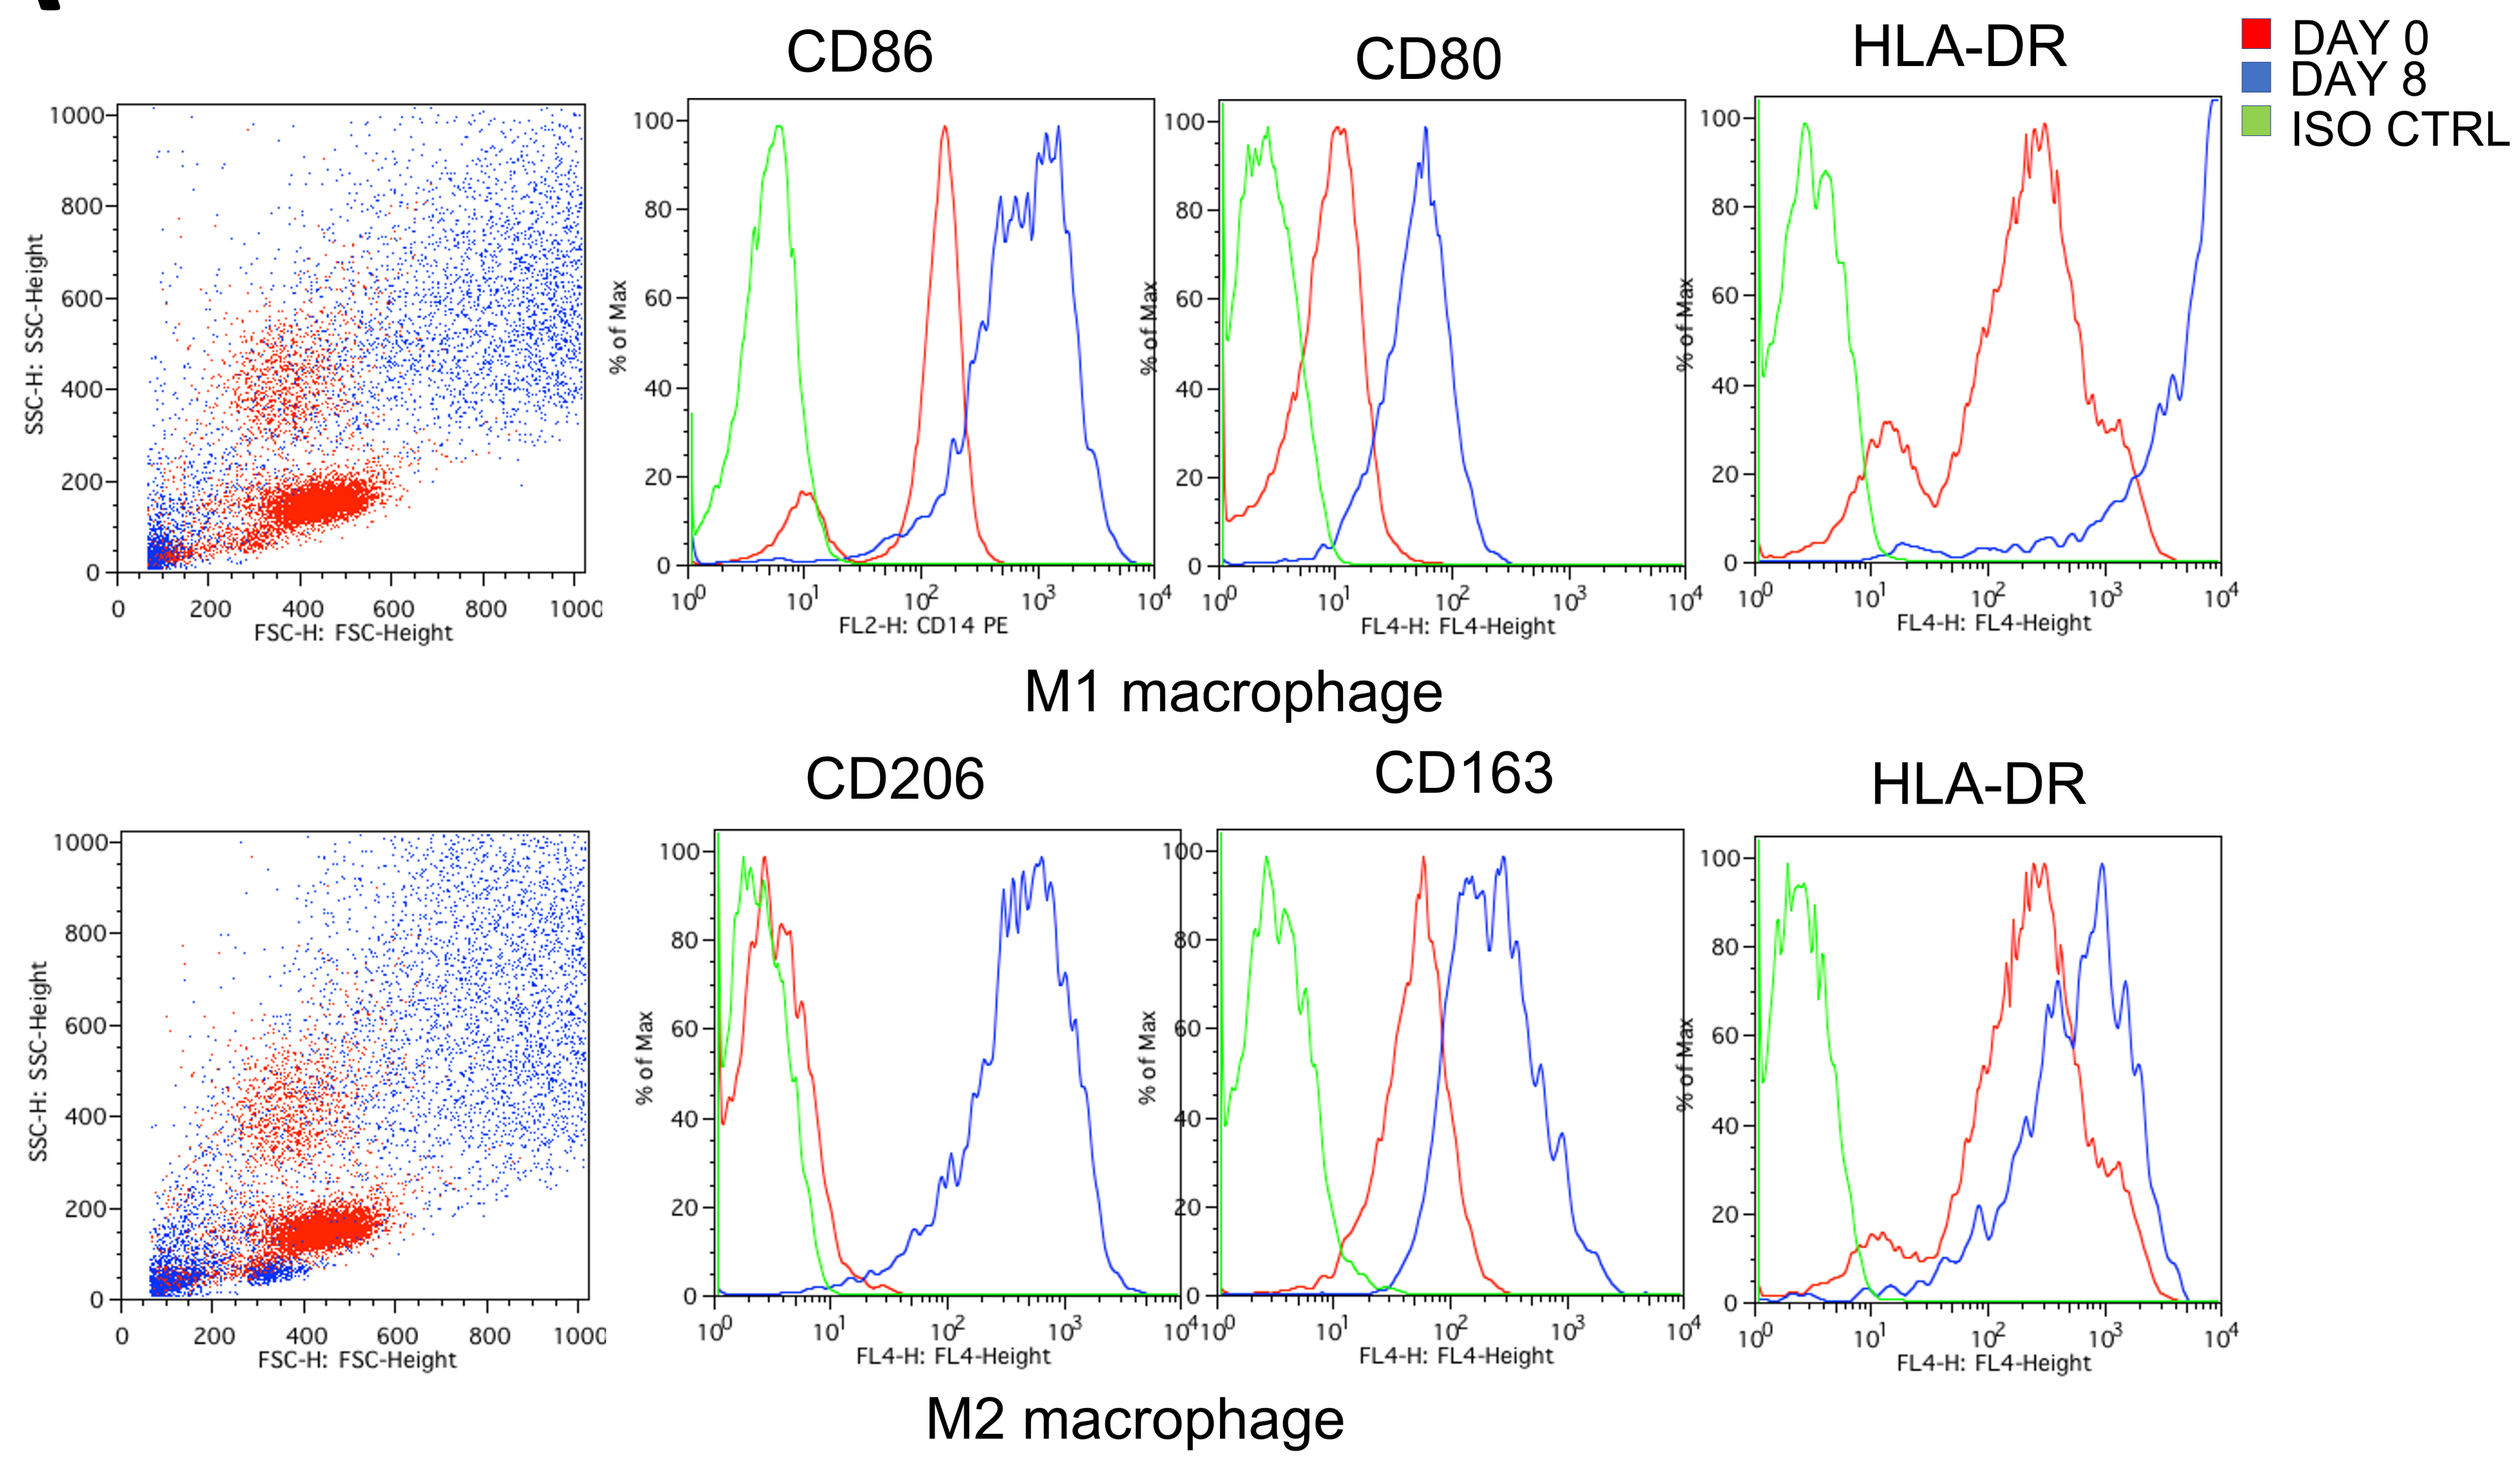

**B**

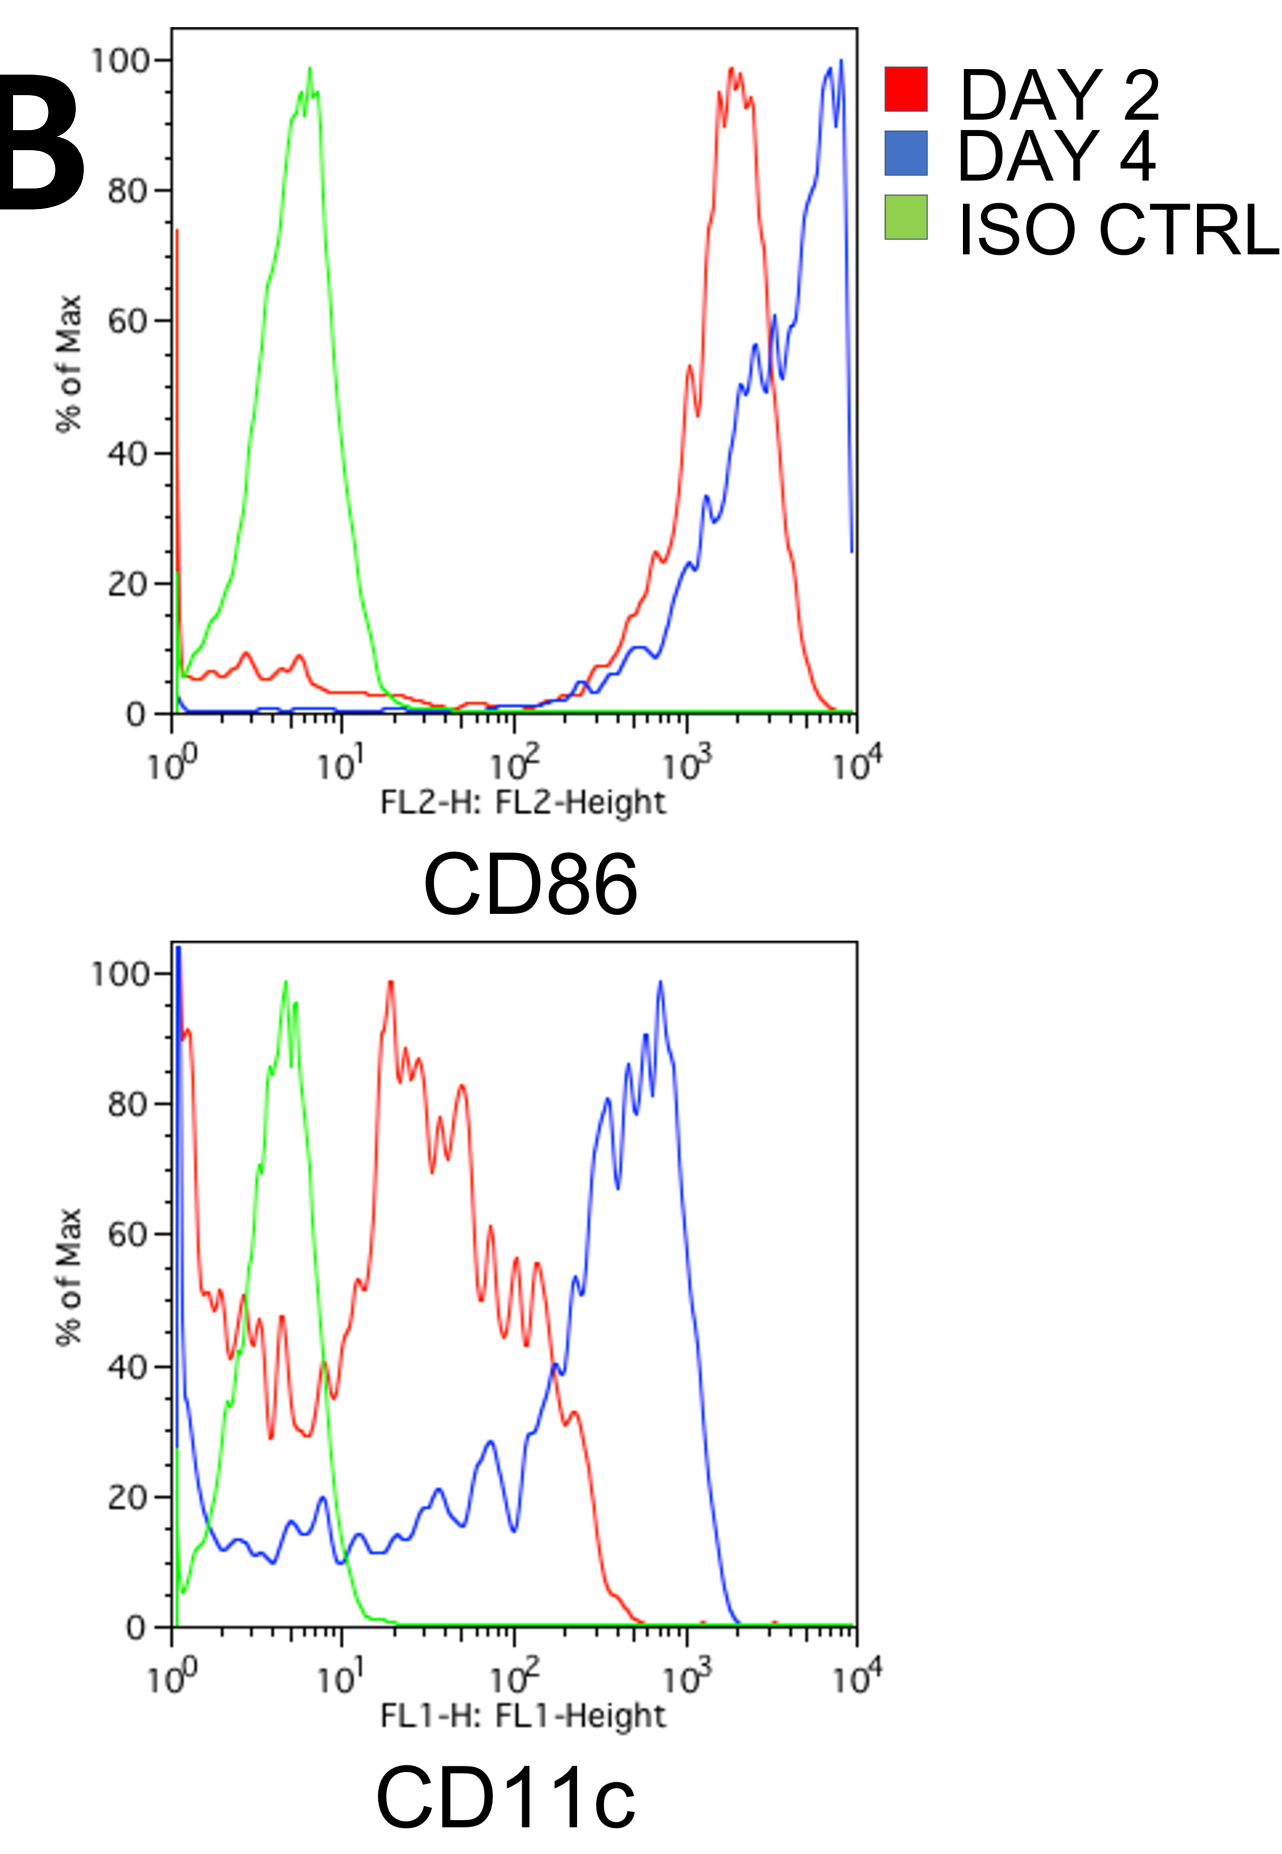

**C**

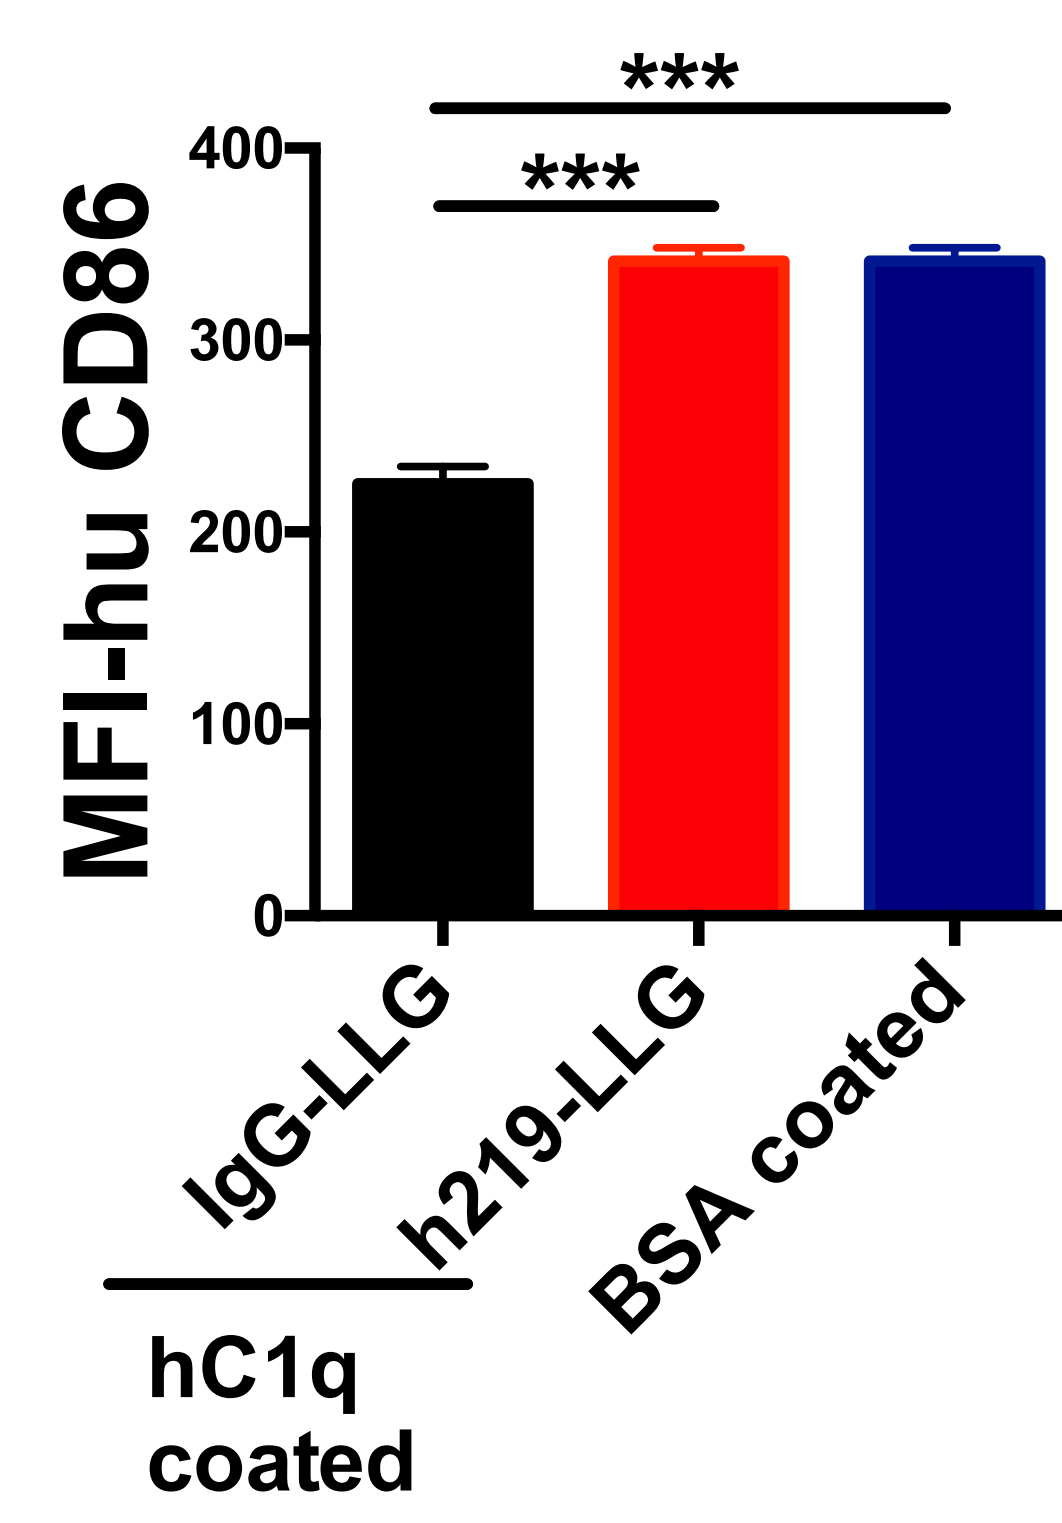

**D**

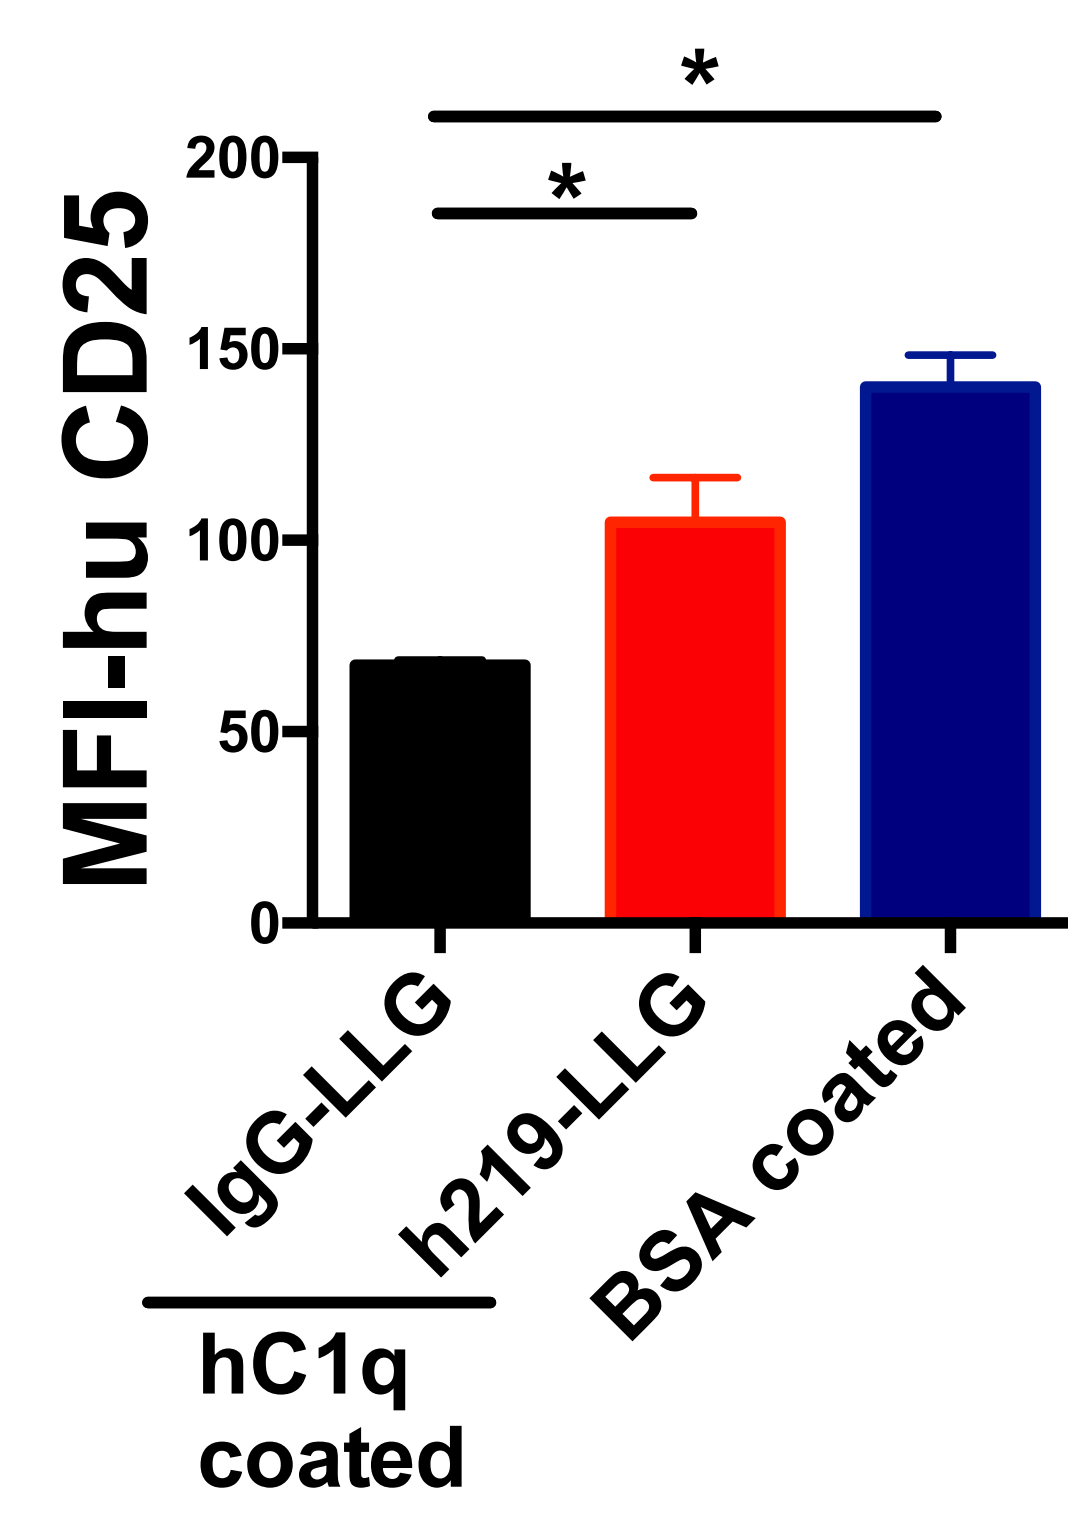

**E**

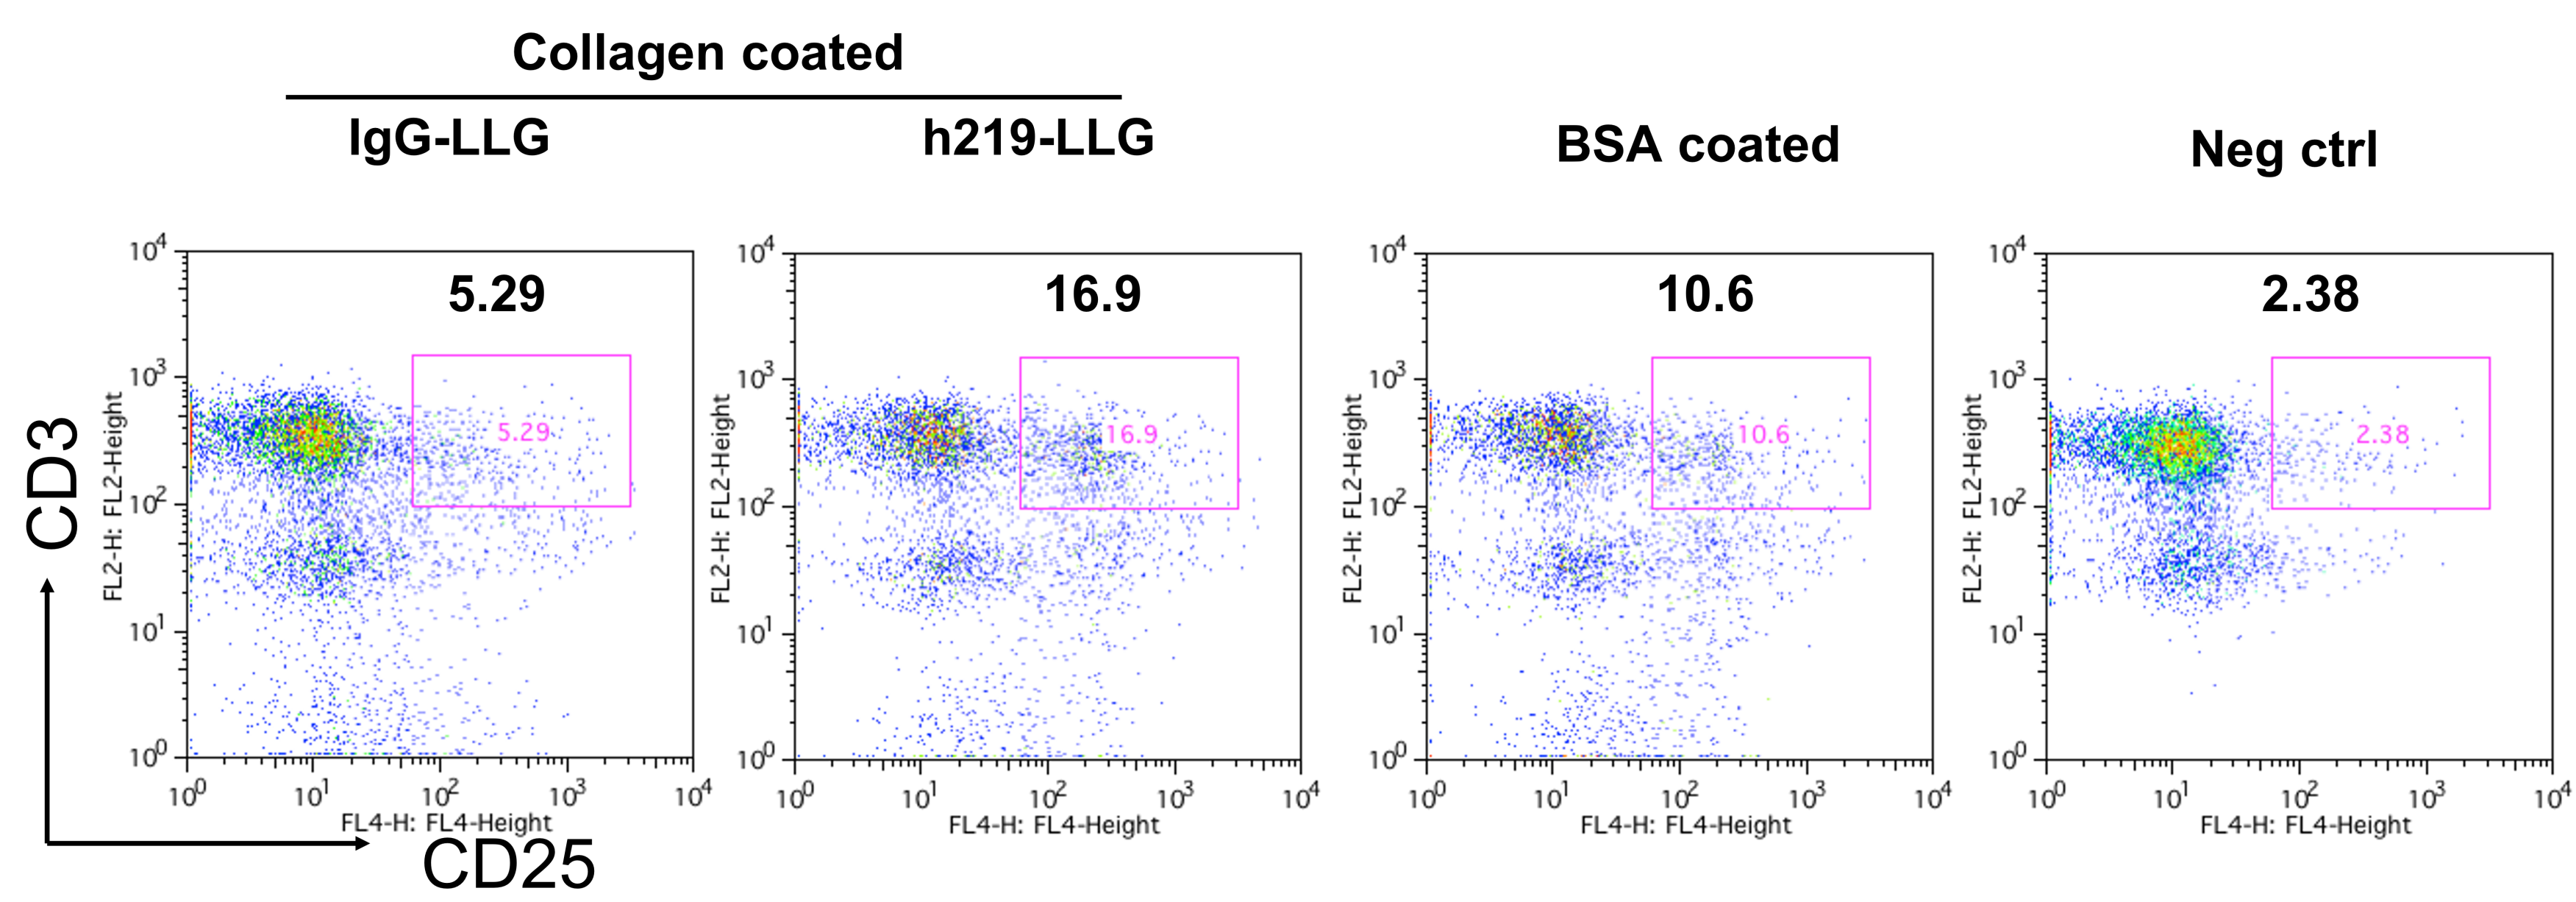

Supplementary Fig 10

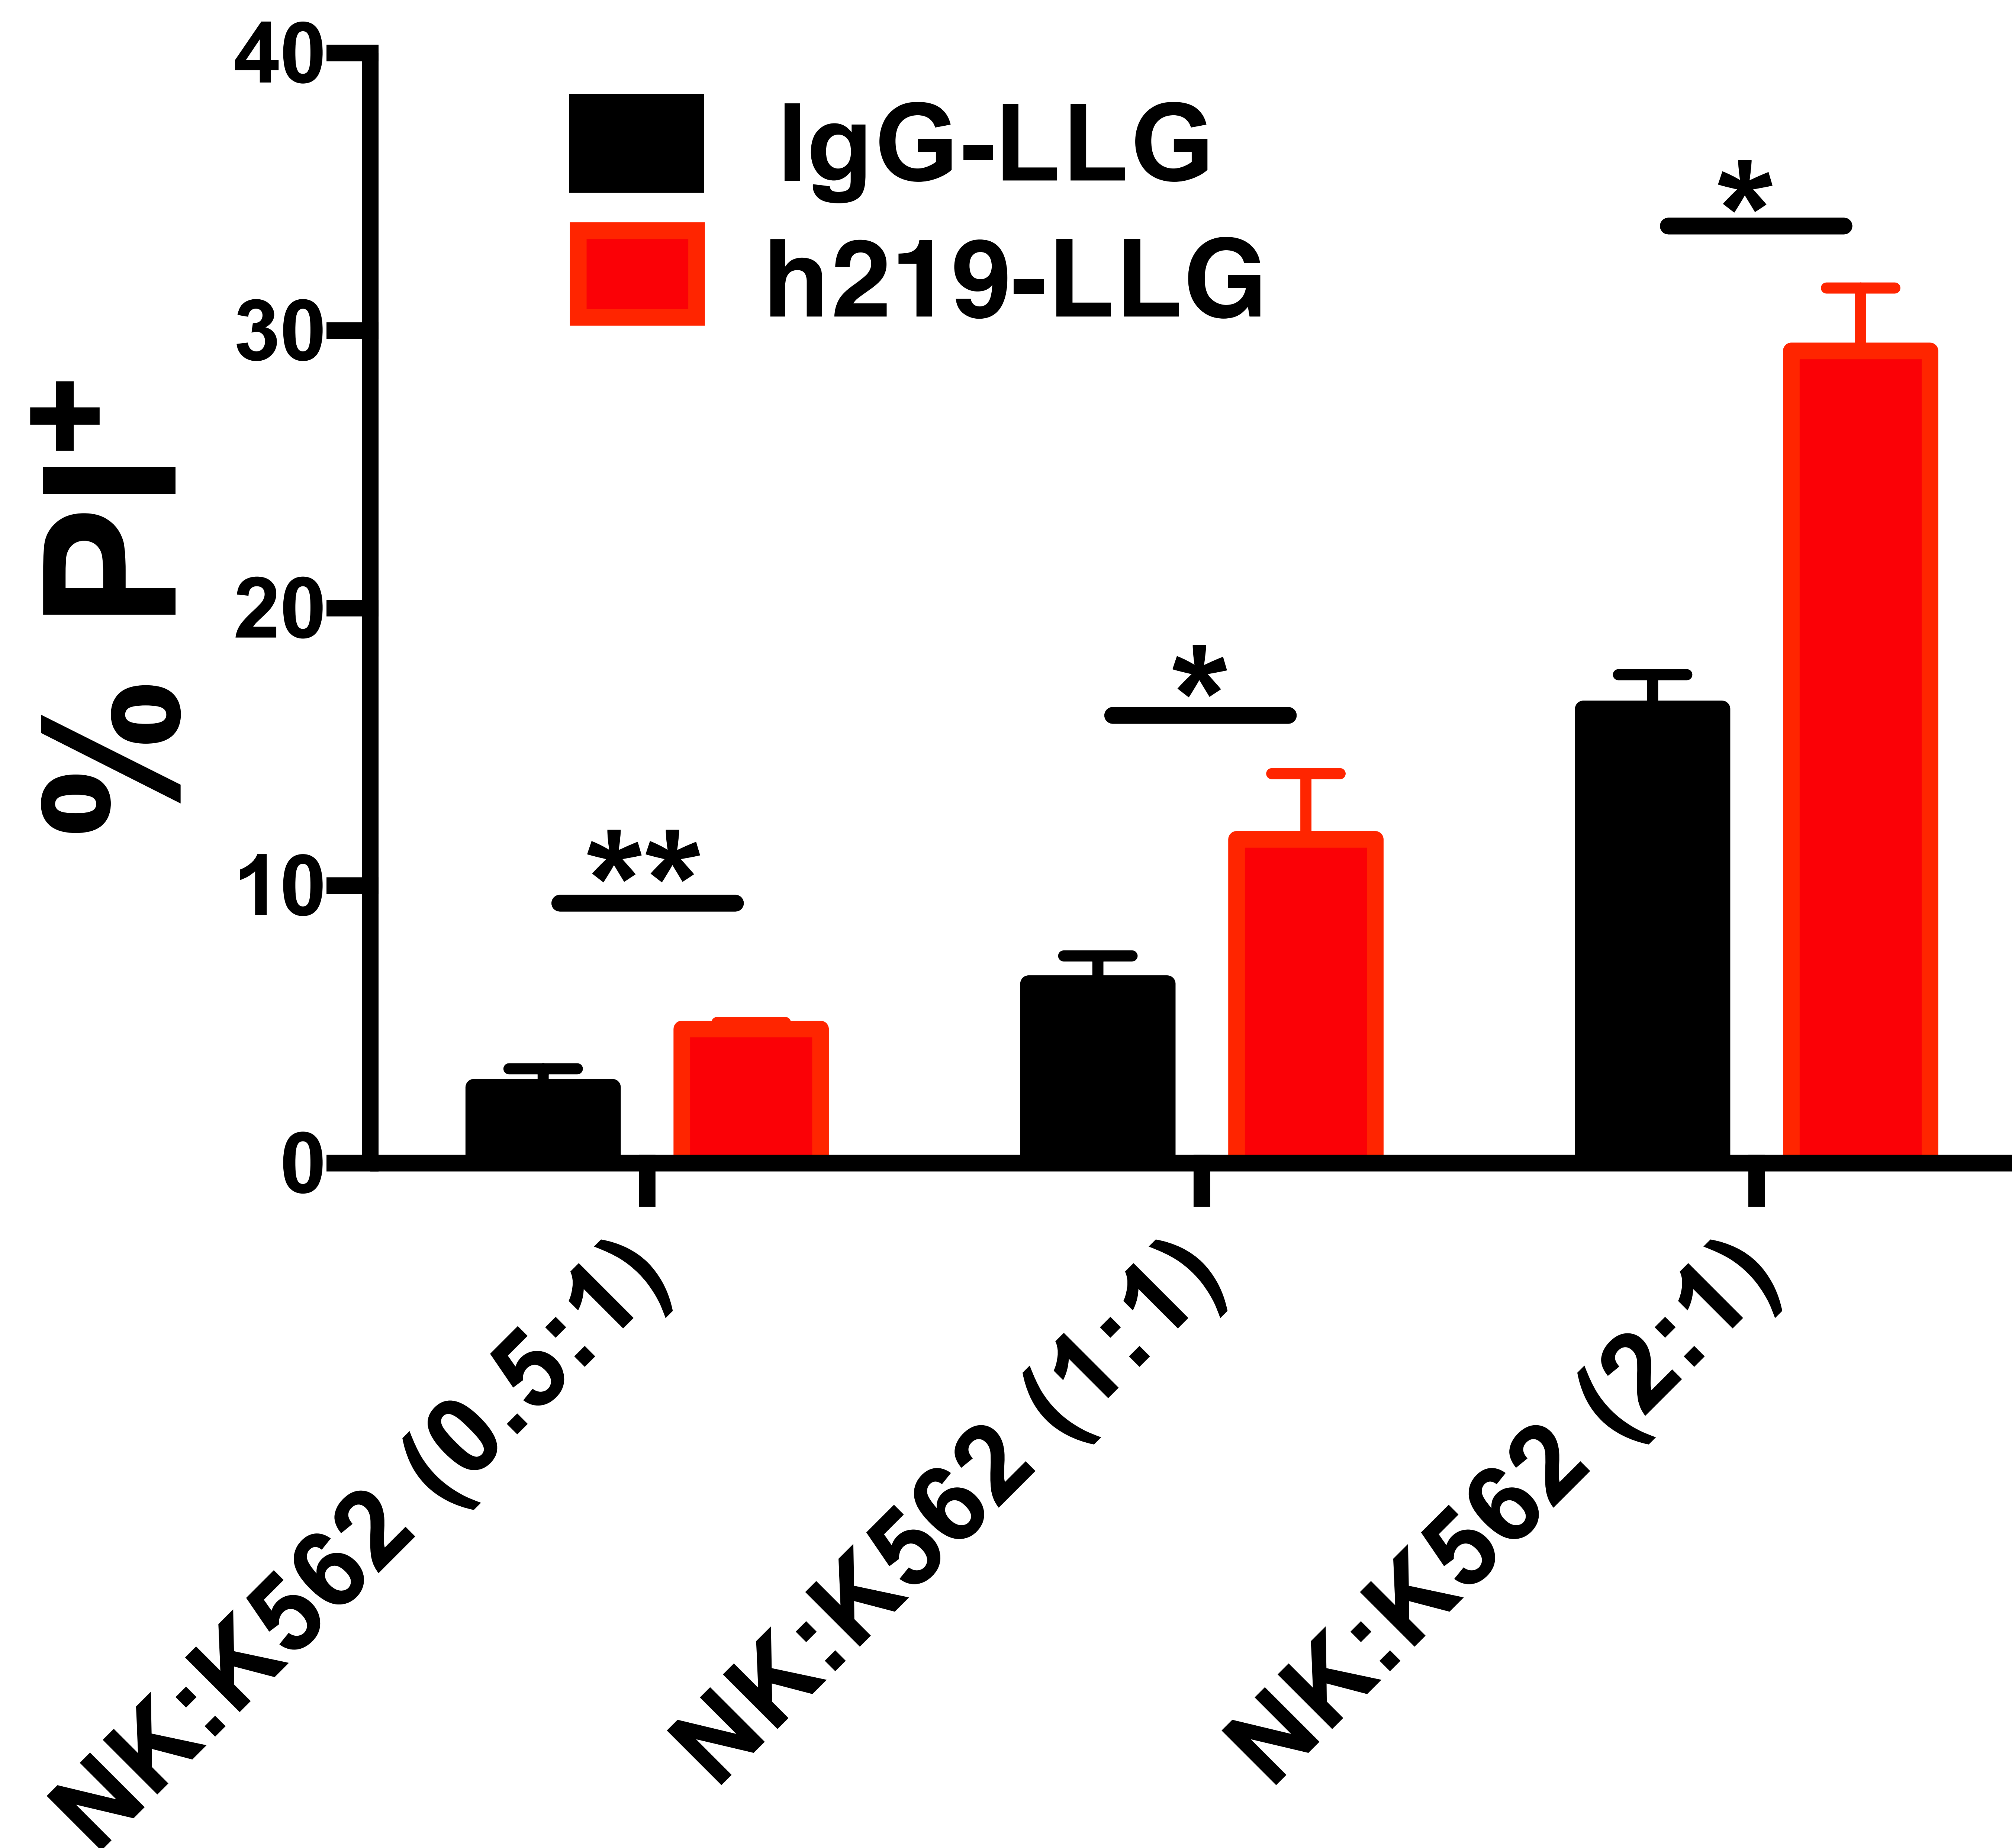

# Supplementary Fig 11

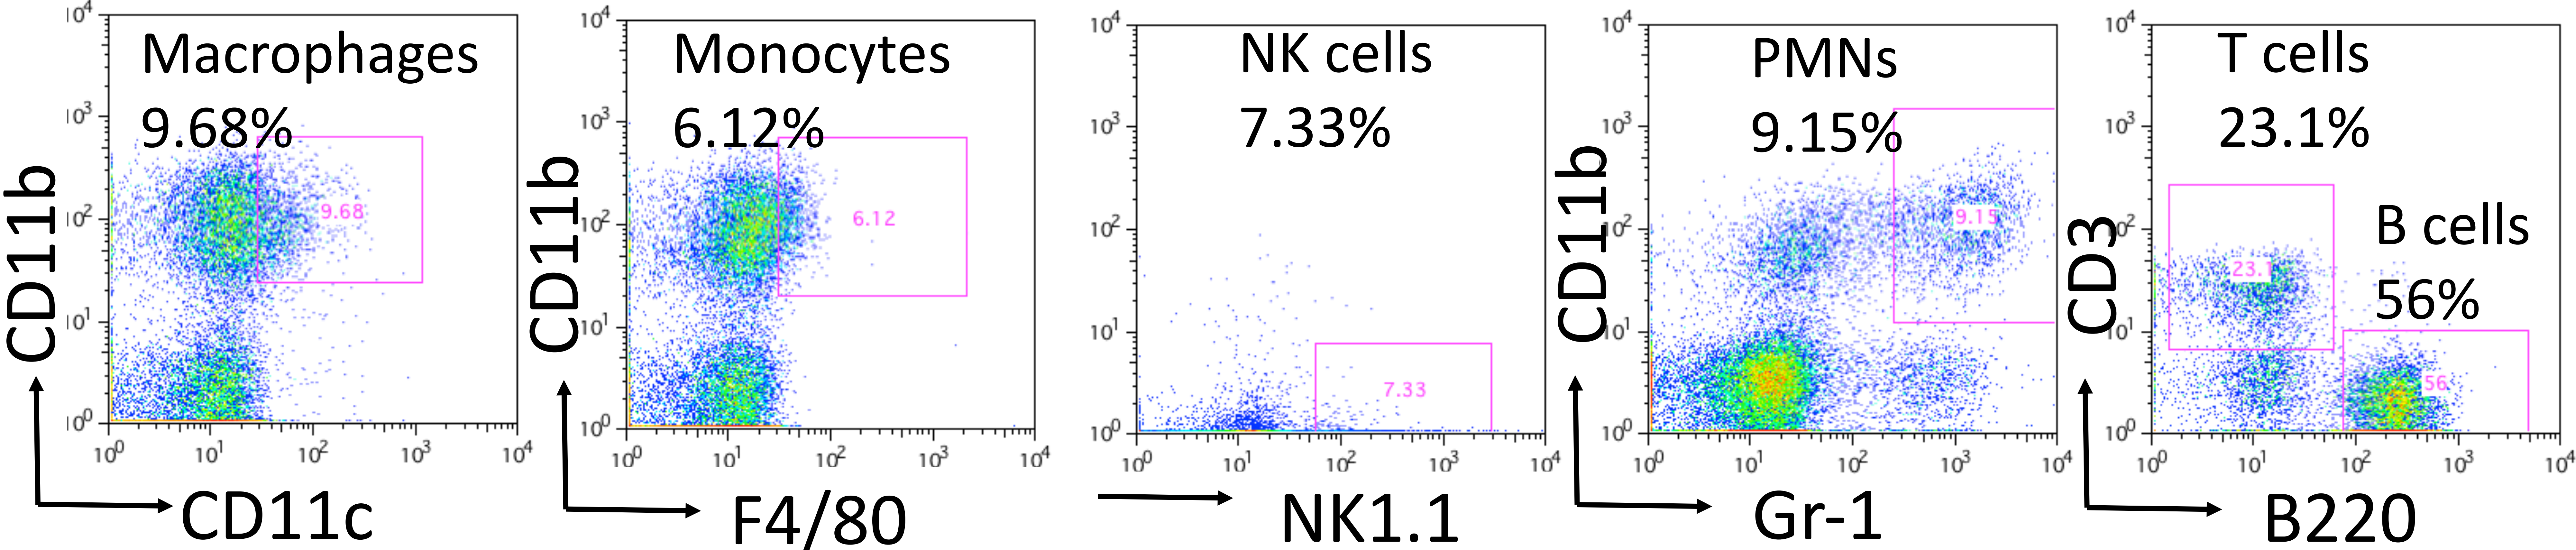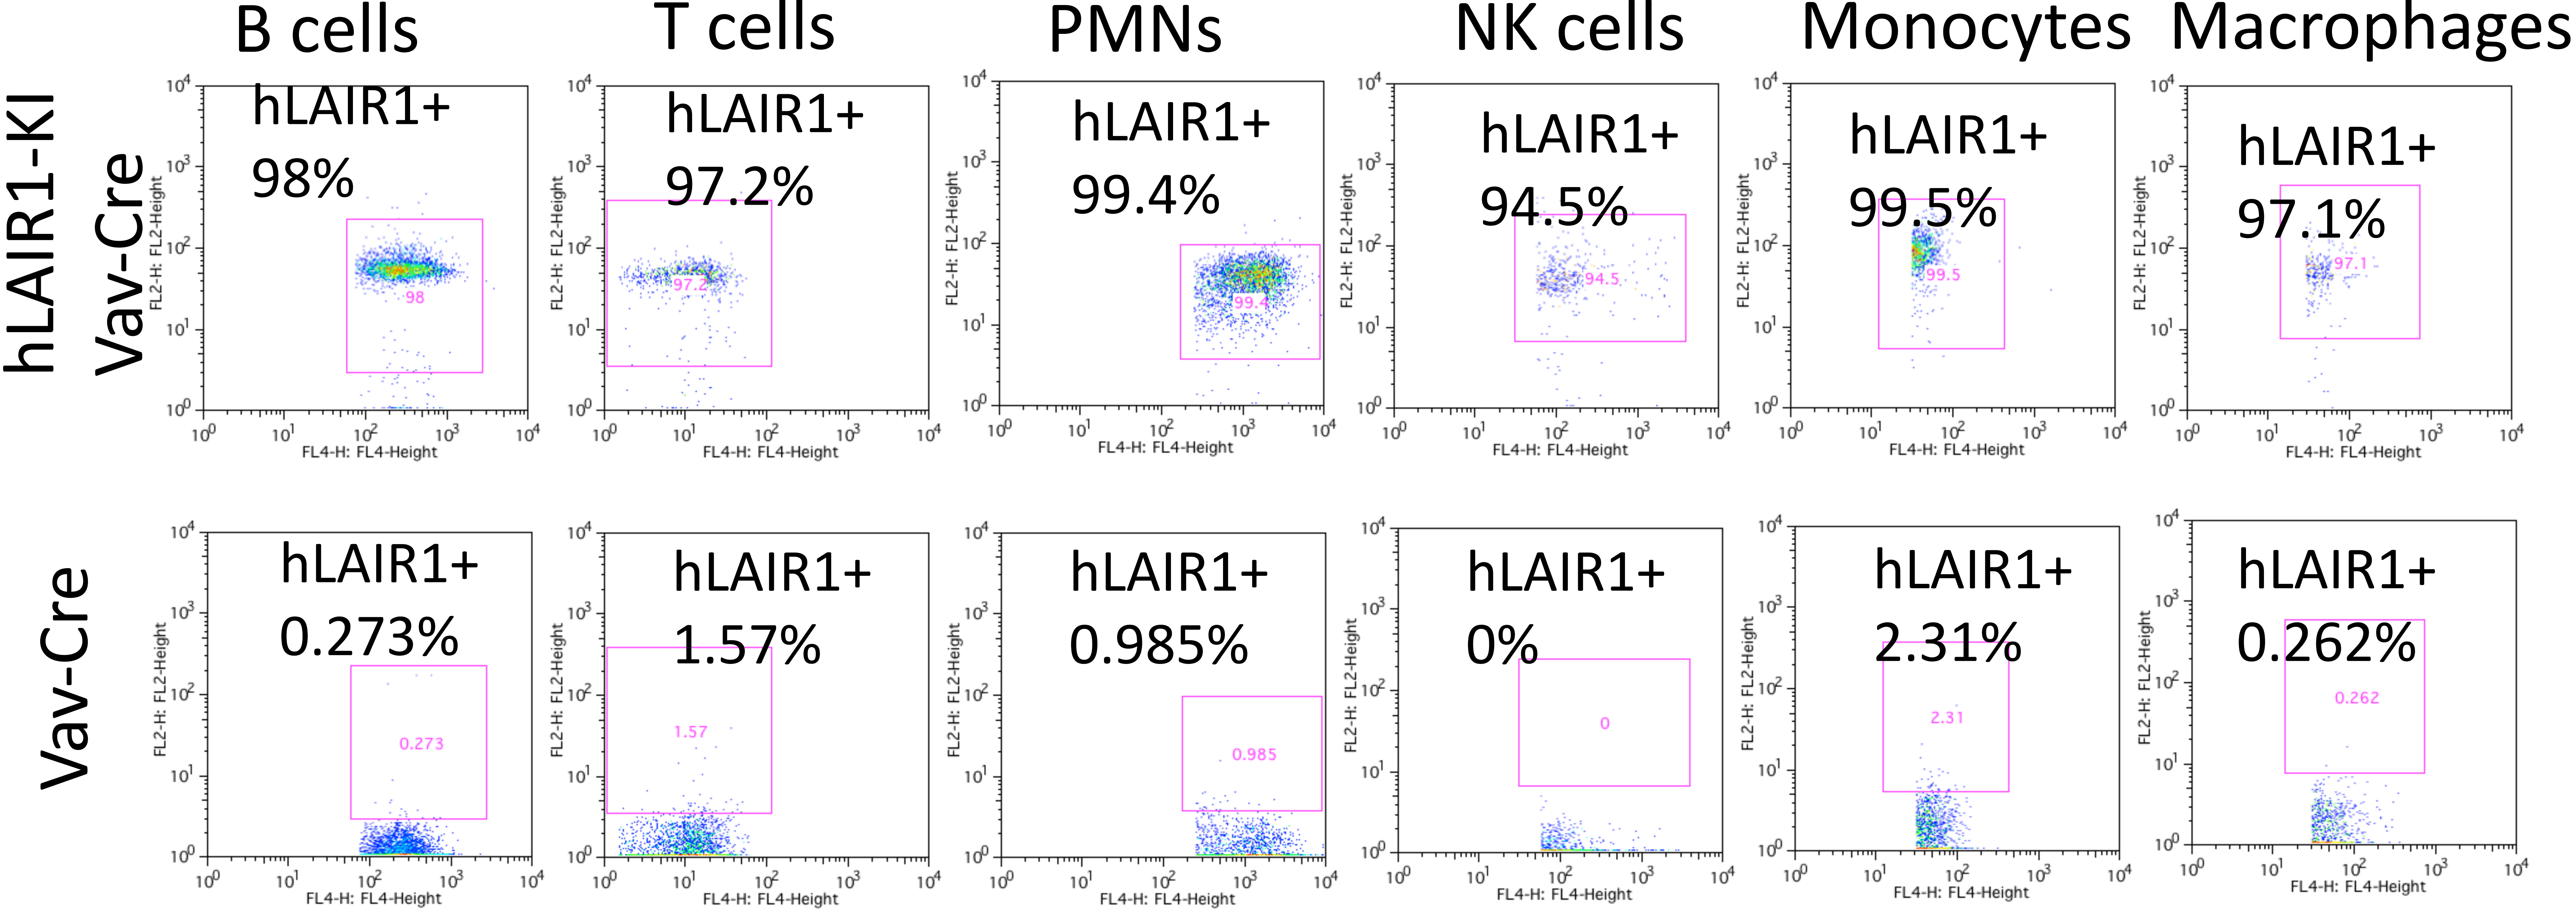

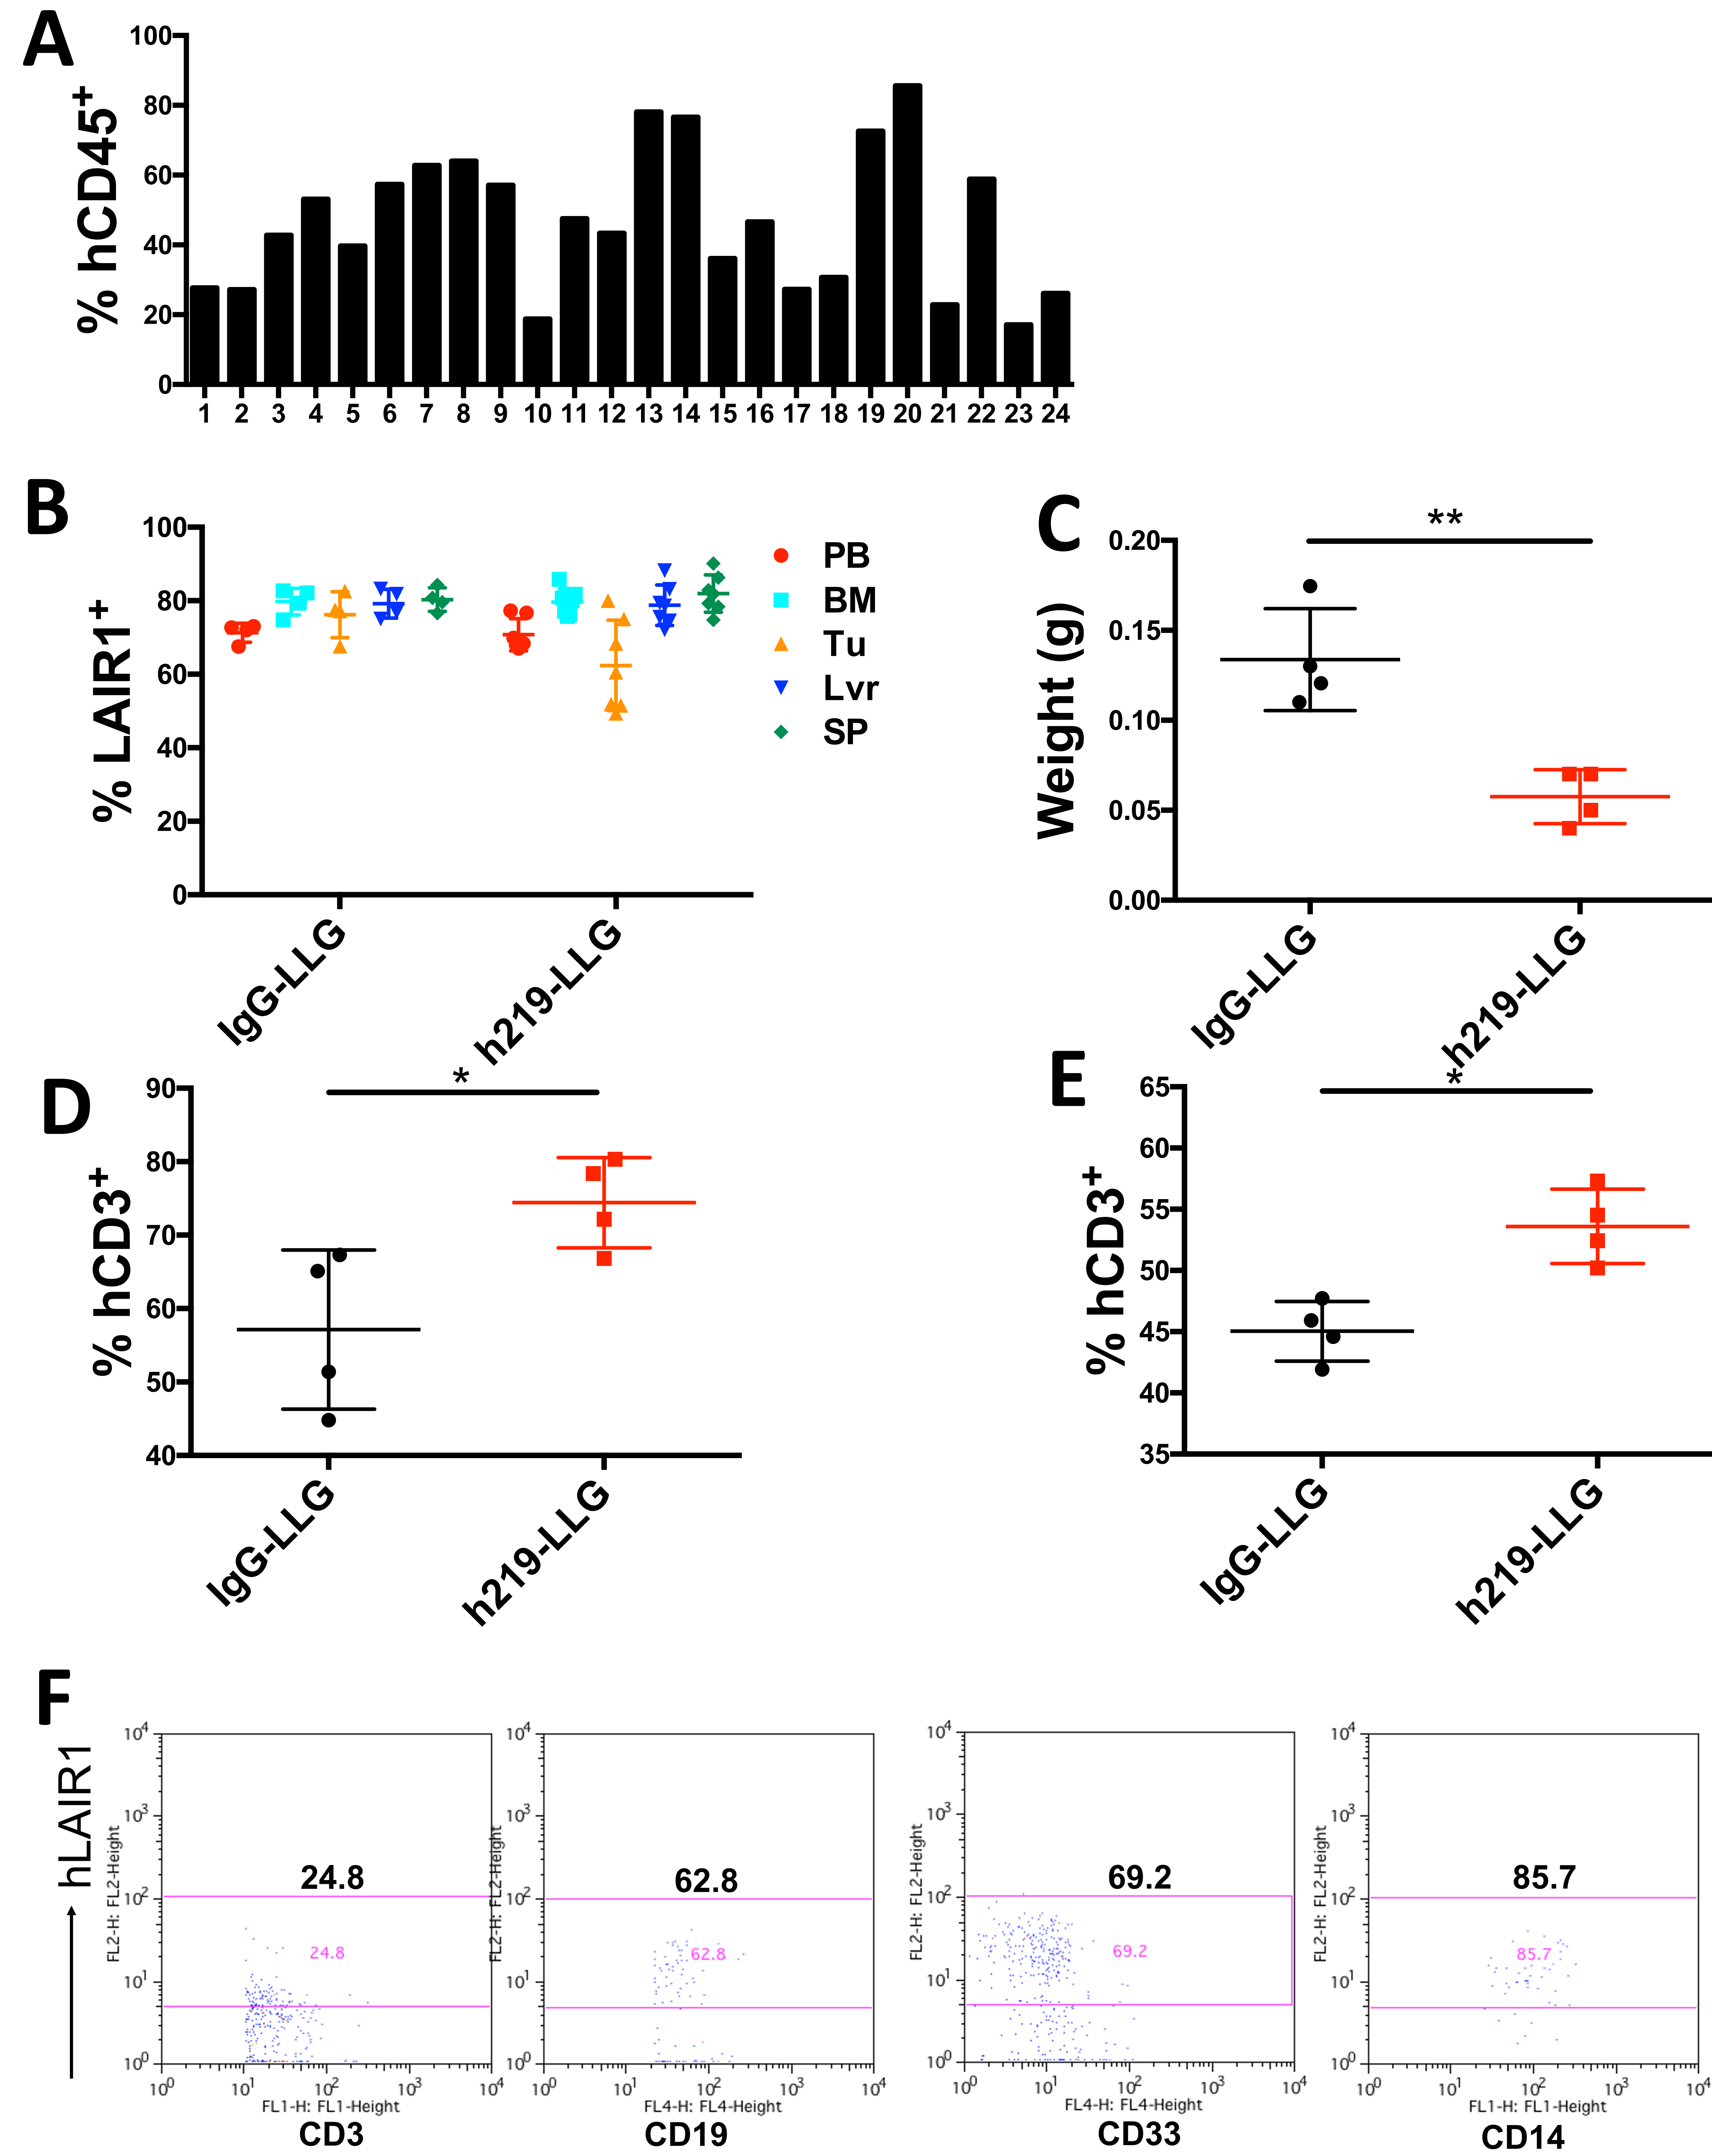

Supplement: Image_1.pdf [file Image_1.pdf]
